# Supplementary material
Source: MDPI journal article supplement (https://www.mdpi.com/2077-0472/14/2/288)
Supplement: s1 [file s1]

**Supplementary material – Relationship among soil biophysicochemical properties, agricultural practices and climate factors influencing soil phosphatase activity in agricultural land.**

Patrícia Campdelacreu Rocabrúna, Xavier Domene, Catherine Preece, Josep Peñuelas Reixach

**Figure S1.** Article search and selection process.

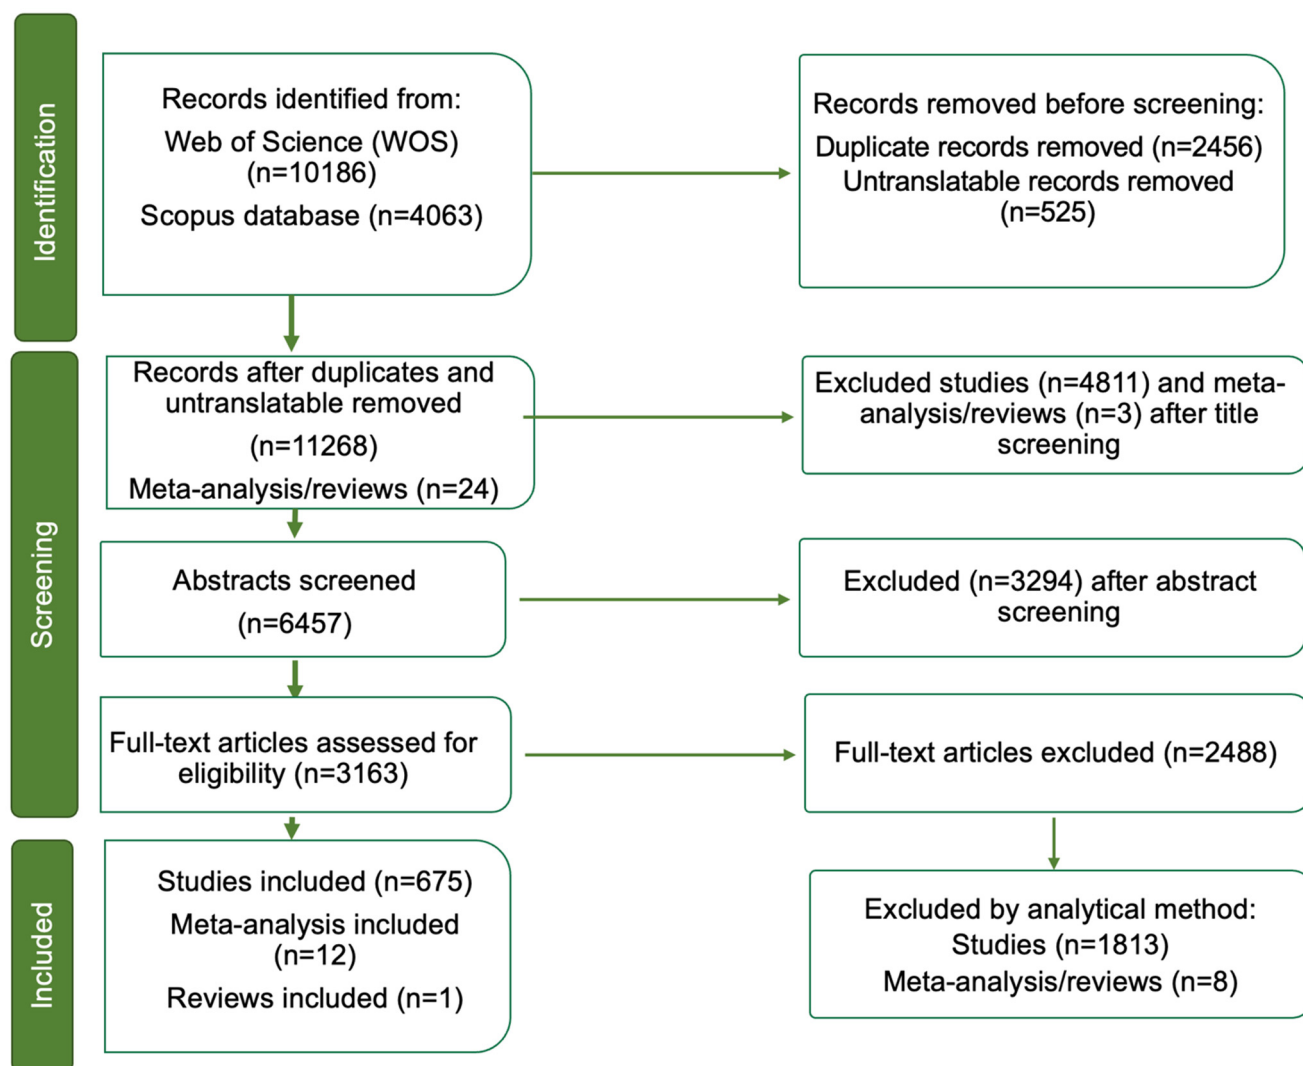

**Table S1.** Comprehensive overview of meta-analyses and reviews investigating explanatory drivers for phosphatase activity (APase), including the total number of studies, enzyme analysis substrates, and ecosystem types.

| Author and Year              | Studies | Type                         | Substrates                                                                                   | Ecosystems                                                             |
|------------------------------|---------|------------------------------|----------------------------------------------------------------------------------------------|------------------------------------------------------------------------|
| Janes-Bassett et al. (2022)  | 37      | Fertilization                | Disodium-p-nitrophenyl phosphate among others                                                | Farmland, grassland                                                    |
| Miao et al. (2019)           | 85      | Fertilization                | Disodium-p-nitrophenyl phosphate, 4-MUB-phosphate                                            | Farmland                                                               |
| Jian et al. (2016)           | 65      | Fertilization                | Disodium-p-nitrophenyl phosphate, 4-MUB-phosphate                                            | Farmland, grassland, forest, peat                                      |
| Marklein and Houlton, (2012) | 34      | Fertilization                | Disodium-p-nitrophenyl phosphate among others                                                | Grassland, shrubland, forest, tundra, wetland                          |
| Pokharel et al. (2020)       | 72      | Fertilization esp. Biochar   | Disodium-p-nitrophenyl phosphate among others                                                | Based on textural classes                                              |
| Lin et al. (2021)            | 73      | Pollution                    | Disodium-p-nitrophenyl phosphate among others                                                | Arable land, grassland                                                 |
| Aponte et al. (2020)         | 46      | Pollution                    | Disodium-p-nitrophenyl phosphate among others                                                | Based on soil (cultivated and uncultivated)                            |
| Riah et al. (2014)           | 47      | Pollution                    | Disodium-p-nitrophenyl phosphate                                                             | Agricultural landscapes, microcosms                                    |
| Margalef et al. (2017)       | 183     | Soil properties/<br>Climatic | Disodium-p-nitrophenyl phosphate, disodium phenyl phosphate, 4-methyl umbelliferyl phosphate | Soil forest, shrublands, grasslands                                    |
| Margalef et al. (2021)       | 97      | Climatic                     | Disodium-p-nitrophenyl phosphate, disodium phenyl phosphate, 4-methyl umbelliferyl phosphate | Soil forest, shrublands, grasslands                                    |
| Gao et al. (2020)            | 79      | Climatic                     | Disodium-p-nitrophenyl phosphate                                                             | Cropland, grassland, forest, wetland, shrubland, wasteland, open area, |
| Meng et al. (2020)           | 78      | Climatic                     | Disodium-p-nitrophenyl phosphate among others                                                | Farmland, forest, grassland, peatland, shrubland, tundra               |
| Sun et al. (2020)            | 139     | Climatic                     | Disodium-p-nitrophenyl phosphate, disodium phenyl phosphate, 4-methyl umbelliferyl phosphate | Soil forest, shrublands, grasslands                                    |

**Table S2.** Comprehensive overview of meta-analyses and reviews detailing factors influencing phosphatase activity (APase), encompassing number of observations, drivers, variables and acid and alkaline phosphatase (ACP and ALP, respectively) response.

| Reference                  | Number of observations* | Driver        | Variable                                                | APase                       | Response |
|----------------------------|-------------------------|---------------|---------------------------------------------------------|-----------------------------|----------|
| Jian et al., 2016          | 16                      | Fertilization | N                                                       | ACP                         | Positive |
| Marklein and Houlton, 2012 | 112                     | Fertilization | N                                                       | ACP, ALP                    | Positive |
| Marklein and Houlton, 2012 | 112                     | Fertilization | P                                                       | ACP, ALP                    | Positive |
| Margalef et al., 2021      | 50                      | Fertilization | N                                                       | ACP, ALP                    | Positive |
| Margalef et al., 2021      | 24                      | Fertilization | P                                                       | ACP, ALP                    | Negative |
| Margalef et al., 2021      | 49                      | Fertilization | N, P                                                    | ACP, ALP                    | Negative |
| Janes-Bassett et al., 2022 | 163                     | Fertilization | P                                                       | Monoesterases (unspecified) | None     |
| Miao et al., 2018          | 46                      | Fertilization | Chemical fertilizer<br>(unbalanced application, NPK)    | ACP, ALP                    | Positive |
| Miao et al., 2018          | 19                      | Fertilization | Organic fertilizer<br>(straw residue retention, manure) | ACP, ALP                    | Positive |
| Miao et al., 2018          | 35                      | Fertilization | Chemical+Organic<br>(NPK+straw, NPK+manure)             | ACP, ALP                    | Positive |
| Pokharel et al., 2020      | 37                      | Fertilization | Biochar                                                 | ACP                         | Positive |
|                            | 23                      |               |                                                         | ALP                         | None     |
| Riah et al., 2014          | 4                       | Pollution     | Herbicide                                               | ACP                         | None     |
|                            | 5                       |               |                                                         | ALP                         | None     |
| Riah et al., 2014          | 4                       | Pollution     | Fungicide                                               | ACP                         | Positive |
|                            | 5                       |               |                                                         | ALP                         | Negative |
| Reference                  | Number of               | Driver        | Variable                                                | APase                       | Response |

|                       | observations* |           |                               |            |                               |
|-----------------------|---------------|-----------|-------------------------------|------------|-------------------------------|
| Riah et al., 2014     | 6<br>8        | Pollution | Insecticide                   | ACP<br>ALP | Negative<br>Positive/<br>none |
| Aponte et al., 2020   | 103<br>67     | Pollution | Pb, Zn, As                    | ACP<br>ALP | Negative<br>Negative          |
|                       | 103<br>67     |           | Cu, Cd                        | ACP<br>ALP | Positive<br>Negative          |
| Lin et al., 2021      | 27<br>13      | Pollution | C, Cu, Ag NMs                 | ACP<br>ALP | Negative                      |
|                       |               |           | Fe NMs                        | ACP<br>ALP | Positive                      |
| Sun et al., 2020      | 139           | Climate   | MAT<br>MAP                    | ACP        | Positive                      |
| Meng et al., 2020     | 78            | Climate   | MAT                           | ACP<br>ALP | Positive                      |
| Margalef et al., 2021 | 13            | Climate   | MAT                           | ACP, ALP   | None                          |
| Margalef et al., 2021 | 11            | Climate   | Drought                       | ACP, ALP   | Negative                      |
| Margalef et al., 2021 | 37            | Climate   | CO <sub>2</sub> fertilization | ACP, ALP   | Positive                      |
| Gao et al., 2020      | 97            | Climate   | Drought                       | ACP        | Negative                      |
|                       | 15            |           |                               | ALP        |                               |

\* When data is accessible, the number of observations evaluating APase activity in cropland, farmland, and grassland is provided.

## Tables S3 to S20

Summary and comprehensive tables inclusive of references.

*Table S3. Single studies of APase response relationships to soil microbe and fauna factors.*

| Soil microbe/fauna factor                              | APase | Response relationship | Vote counting | Study                                                                                                                                                                                                                                                                                               |
|--------------------------------------------------------|-------|-----------------------|---------------|-----------------------------------------------------------------------------------------------------------------------------------------------------------------------------------------------------------------------------------------------------------------------------------------------------|
| Total microbe activity                                 | ACP   | Positive              | 9             | Boccolini et al., 2019;<br>Bolton et al., 1985;<br>Chellappa et al., 2021;<br>Datta et al., 2021;<br>Nath et al., 2017;<br>Nedunchezhiyan et al., 2018;<br>Radhakrishnan et al., 2022;<br>Stegarescu et al., 2021;<br>Tu C.M., 1995;                                                                |
|                                                        | ALP   | Positive              | 4             | Datta et al., 2021;<br>Delgado et al., 2012;<br>Nedunchezhiyan et al., 2018;<br>Singh et al., 2022;                                                                                                                                                                                                 |
| Microbe abundance<br>(Bacteria, Actinobacteria, Fungi) | ACP   | Positive              | 11            | Carricondo-Martínez et al., 2022;<br>Chen et al., 2018;<br>Chowdhury and Rasid, 2021b;<br>Dolker et al., 2020;<br>Idris and Yuliar, 2021;<br>Li et al., 2002;<br>Meher et al., 2021;<br>Sanchez-Peinado et al., 2009;<br>Swędrzyńska et al., 2013;<br>Tarafdar et al., 1989;<br>Yu et al., 2021;    |
|                                                        | ALP   | Positive              | 12            | Al-Taweel et al., 2019;<br>Firmano et al., 2021;<br>Idris and Yuliar, 2021;<br>Lemanowicz et al., 2016;<br>Li et al., 2017a;<br>Li et al., 2002;<br>Meher et al., 2021;<br>Niewiadomska et al., 2016;<br>Tamilselvi et al., 2015;<br>Tarafdar et al., 1989;<br>Xu et al., 2019;<br>Yu et al., 2021; |
| Microbial biomass phosphorus content                   | ACP   | Positive              | 6             | Basak and Gajbhiye, 2018;                                                                                                                                                                                                                                                                           |

|                                     |     |          |    |                                                                                                                                                                                                                                                                                                                                                                                                                                                                                                                                                                                                                                                                                                                                                                                                                                                                                     |
|-------------------------------------|-----|----------|----|-------------------------------------------------------------------------------------------------------------------------------------------------------------------------------------------------------------------------------------------------------------------------------------------------------------------------------------------------------------------------------------------------------------------------------------------------------------------------------------------------------------------------------------------------------------------------------------------------------------------------------------------------------------------------------------------------------------------------------------------------------------------------------------------------------------------------------------------------------------------------------------|
|                                     |     |          |    | de Jesus Franco et al., 2020;<br>Katsalirou et al., 2016;<br>Moharana et al., 2022;<br>Redel et al., 2011;<br>Turner and Haygarth, 2005;                                                                                                                                                                                                                                                                                                                                                                                                                                                                                                                                                                                                                                                                                                                                            |
|                                     | ALP | Positive | 6  | Basak and Gajbhiye, 2018;<br>Hu et al., 2009a;<br>Katsalirou et al., 2016;<br>Moharana et al., 2022;<br>Touhami et al., 2021;<br>Zhou et al., 2022;                                                                                                                                                                                                                                                                                                                                                                                                                                                                                                                                                                                                                                                                                                                                 |
| Microbial biomass<br>carbon content | ACP | Positive | 36 | Ansari et al., 2021;<br>Antolín et al., 2005;<br>Arora et al., 2021;<br>Balota et al., 2011b;<br>Banerjee et al., 1999;<br>Bhattacharyya et al., 2003;<br>Biswas et al., 2018;<br>Borase et al., 2021;<br>Choudhary et al., 2021;<br>Chowdhury and Rasid, 2021a;<br>Chowdhury and Rasid, 2021b;<br>da Cunha et al., 2021;<br>de Barros et al., 2019;<br>de Castro Lopes et al., 2013;<br>de Jesus Franco et al., 2020;<br>Feng et al., 2021;<br>Furtak et al., 2017;<br>Gelsomino et al., 2011;<br>Hazarika et al., 2009;<br>He et al., 2010;<br>Katsalirou et al., 2016;<br>Li et al., 2012;<br>Liu et al., 2008;<br>Lungmuana et al., 2019;<br>Mahajan et al., 2021;<br>Mandal et al., 2007;<br>Pascual et al., 2007;<br>Rouydel et al., 2021;<br>Roy et al., 2019;<br>Sarkar et al., 2009;<br>Sudhakaran et al., 2019;<br>Tamilselvi et al., 2015;<br>Turner and Haygarth, 2005; |

|                                       |     |          |    |                                                                                                                                                                                                                                                                                                                                                                                                                                                                                                                                                                                                                                                                                                                                                                                                                                                                                                                                                                  |
|---------------------------------------|-----|----------|----|------------------------------------------------------------------------------------------------------------------------------------------------------------------------------------------------------------------------------------------------------------------------------------------------------------------------------------------------------------------------------------------------------------------------------------------------------------------------------------------------------------------------------------------------------------------------------------------------------------------------------------------------------------------------------------------------------------------------------------------------------------------------------------------------------------------------------------------------------------------------------------------------------------------------------------------------------------------|
|                                       |     | Negative | 1  | Tuti et al., 2020;<br>Wei et al., 2017;<br>Woźniak et al., 2022;<br>Bera et al., 2016;                                                                                                                                                                                                                                                                                                                                                                                                                                                                                                                                                                                                                                                                                                                                                                                                                                                                           |
| ALP                                   |     | Positive | 38 | Acosta-Martínez et al., 2004;<br>Acosta-Martínez et al., 2011a;<br>Arora et al., 2021;<br>Bera et al., 2016;<br>Bissonette et al., 2001;<br>Biswas et al., 2018;<br>Borase et al., 2021;<br>Chander et al., 1997;<br>Chaudhary et al., 2015;<br>Choudhary et al., 2021;<br>Dar G., 1996;<br>Dong et al., 2016;<br>Gelsomino et al., 2011;<br>He et al., 2010<br>Hojati and Nourbakhsh, 2006;<br>Katsalirou et al., 2016;<br>Kaur et al., 2017;<br>Li et al., 2017a;<br>Li et al., 2012;<br>Liu and Zhou, 2017;<br>Lungmuana et al., 2019;<br>Madejón et al., 2007<br>Mandal et al., 2007<br>Mbarki et al., 2010<br>Melero et al., 2007a;<br>Pascual et al., 2007<br>Rouydel et al., 2021;<br>Roy et al., 2019;<br>Sarkar et al., 2009;<br>Sepat et al., 2014;<br>Sudhakaran et al., 2019;<br>Tamilselvi et al., 2015;<br>Tripathi et al., 2007;<br>Tuti et al., 2020;<br>Verma et al., 2016b;<br>Wang et al., 2014a;<br>Wick et al., 1998;<br>Zhao et al., 2009; |
| Microbial biomass<br>nitrogen content | ACP | Positive | 10 | Ajwaa et al., 1999;<br>Borase et al., 2021;                                                                                                                                                                                                                                                                                                                                                                                                                                                                                                                                                                                                                                                                                                                                                                                                                                                                                                                      |

|                                                   |     |          |    |                                                                                                                                                                                                                                                                  |
|---------------------------------------------------|-----|----------|----|------------------------------------------------------------------------------------------------------------------------------------------------------------------------------------------------------------------------------------------------------------------|
|                                                   |     |          |    | de Jesus Franco et al., 2020;<br>Furtak et al., 2017;<br>Gelsomino et al., 2011;<br>Katsalirou et al., 2016;<br>Lungmuana et al., 2019;<br>Sarkar et al., 2009;<br>Sudhakaran et al., 2019;<br>Woźniak et al., 2022;                                             |
|                                                   | ALP | Positive | 10 | Acosta-Martínez et al., 2011a;<br>Borase et al., 2021;<br>Dong et al., 2016;<br>Gelsomino et al., 2011;<br>Katsalirou et al., 2016;<br>Lungmuana et al., 2019;<br>Mandal et al., 2007<br>Sarkar et al., 2009;<br>Sepat et al., 2014;<br>Sudhakaran et al., 2019; |
| Microbe diversity<br>(Shannon diversity<br>index) | ACP | Positive | 3  | Diallo-Diagne et al., 2016;<br><br>Sun et al., 2018;<br><br>Woźniak et al., 2022;                                                                                                                                                                                |
|                                                   | ALP | Positive | 2  | Cao et al., 2021;<br>Liu et al., 2021a;                                                                                                                                                                                                                          |
| phoD gene<br>abundance and<br>richness            | ALP | Positive | 3  | Bi et al., 2020<br><br>Gou et al., 2020;<br>Wang et al., 2022c;                                                                                                                                                                                                  |
| Earthworm<br>abundance                            | ACP | Positive | 2  | Noronha et al., 2022;<br><br>Saha et al., 2008a;                                                                                                                                                                                                                 |
|                                                   |     | None     | 1  | Wu et al., 2012;                                                                                                                                                                                                                                                 |
|                                                   | ALP | Positive | 3  | Balachandar et al., 2021;<br>Buck et al., 2000;<br>Tao et al., 2009;                                                                                                                                                                                             |
|                                                   |     | None     | 1  | Stoven and Schnug, 2009;                                                                                                                                                                                                                                         |



*Table S4. Single and meta-analysis studies of APase response relationships to soil physical properties.*

| Soil property | APase<br>(single <sup>1</sup> or<br>meta-<br>analysis <sup>2</sup><br>study) | Response<br>relationships | Vote<br>counting | Study                                                                                                                                                                                                                                                                                                                                                                                                                                                                                                                                                                                                                                                           |
|---------------|------------------------------------------------------------------------------|---------------------------|------------------|-----------------------------------------------------------------------------------------------------------------------------------------------------------------------------------------------------------------------------------------------------------------------------------------------------------------------------------------------------------------------------------------------------------------------------------------------------------------------------------------------------------------------------------------------------------------------------------------------------------------------------------------------------------------|
| Depth         | ACP <sup>1</sup>                                                             | Negative                  | 26               | Baligar et al., 2005;<br>Bolton et al., 1993;<br>Cao et al., 2021;<br>de Barros et al., 2019;<br>de Castro Lopes et al., 2021;<br>Denton et al., 2006;<br>Fialho et al., 2008;<br>Firmano et al., 2021;<br>Gelsomino et al., 2011;<br>Guo et al., 2009<br>Kahle et al., 2010;<br>Kumar et al., 2021a;<br>Lemanowicz et al., 2016;<br>Rao et al., 1995;<br>Sigua et al., 2017;<br>Tarafdar et al., 1989;<br>Taylor et al., 2002;<br>Tiecher et al., 2012;<br>Trujillo-Narcía et al., 2019;<br>Venkatesan et al., 2006<br>Wang et al., 2011c;<br>Wang et al., 2012;<br>Yoshioka et al., 2006;<br>Zhang et al., 2016b;<br>Zhong et al., 2015;<br>Zhu et al., 2022; |
|               | ALP <sup>1</sup>                                                             | Negative                  | 18               | Cao et al., 2021;<br>Caudle et al., 2020;<br>de Barros et al., 2019;<br>Dou et al., 2016;<br>Gelsomino et al., 2011;<br>Guo et al., 2009<br>Jat et al., 2019;<br>Kumar et al., 2021a;<br>Lalande et al., 2009;<br>Lemanowicz et al., 2016;<br>Mahmood et al., 2022;<br>Melero et al., 2008b;                                                                                                                                                                                                                                                                                                                                                                    |

|                       |                  |          |    |                                                                                                                                                                                                                                                                                              |
|-----------------------|------------------|----------|----|----------------------------------------------------------------------------------------------------------------------------------------------------------------------------------------------------------------------------------------------------------------------------------------------|
|                       |                  |          |    | Melero et al., 2011;<br>Rao et al., 1995;<br>Rao et al., 1997;<br>Stehouwer et al., 1993;<br>Tarafdar et al., 1989;<br>Zhang et al., 2018;                                                                                                                                                   |
| Soil moisture content | ACP <sup>1</sup> | Positive | 5  | Gispert et al., 2013;<br><br>Hoyle and Murphy, 2006;<br>Lungmuana et al., 2019;<br>Omenda et al., 2019;<br>Stegarescu et al., 2021;                                                                                                                                                          |
|                       | ALP <sup>1</sup> | Positive | 2  | Gangwar et al., 2021;<br>Monaci et al., 2022;                                                                                                                                                                                                                                                |
|                       |                  | None     | 1  | Wang et al., 2022a;                                                                                                                                                                                                                                                                          |
| Clay content          | ACP <sup>1</sup> | Positive | 10 | Acosta-Martínez et al., 2003b;<br>Bossio et al., 2005;<br>Cycoń et al., 2013;<br>Cycoń Piotrowska-Seget, 2015;<br>de Castro Lopes et al., 2013;<br>Fernández et al., 2008;<br>Mejia Guerra et al., 2018;<br>Nedyalkova et al., 2020;<br>Nedyalkova et al., 2020;<br>Sudhakaran et al., 2019; |
|                       | ALP <sup>1</sup> | Positive | 21 | Abdalla and Lager, 2009;<br>Acosta-Martínez et al., 2003b;<br>Acosta-Martínez et al., 2003a;<br>Banerjee et al., 2008;<br>Bergstrom and Monreal, 1998a;<br>Calvarro et al., 2014;<br>Cycoń et al., 2013;<br>Dar G., 1996;<br>Fernández et al., 2008;                                         |
|                       |                  |          |    | Gelsomino et al., 2011;<br>Li et al., 2018c;<br>Łukowski and Dec, 2018;                                                                                                                                                                                                                      |

|                                   |                       |          |   |                                                                                                                                                                                                                                      |
|-----------------------------------|-----------------------|----------|---|--------------------------------------------------------------------------------------------------------------------------------------------------------------------------------------------------------------------------------------|
|                                   |                       |          |   | Mahmood et al., 2022;<br>Melero et al., 2007a;<br>Senwo et al., 2007;<br>Stehouwer et al., 1993;<br>Stenberg et al., 1998;<br>Sudhakaran et al., 2019;<br>Tavali et al., 2021;<br>Vekemans et al., 1989;<br>Wyszkowska et al., 2005; |
|                                   | ACP, ALP <sup>2</sup> | Positive | 1 | Aponte et al., 2020;                                                                                                                                                                                                                 |
| Sand content                      | ACP <sup>1</sup>      | Positive | 1 | Acosta-Martínez et al., 2003b;                                                                                                                                                                                                       |
|                                   |                       | Negative | 3 | Fernández-Calviño et al., 2010;<br>Nedyalkova et al., 2020;<br>Woźniak et al., 2022;                                                                                                                                                 |
|                                   | ALP <sup>1</sup>      | Positive | 3 | Acosta-Martínez et al., 2003b;<br>Bergstrom and Monreal, 1998a;<br>Wyszkowska et al., 2005;                                                                                                                                          |
|                                   |                       | Negative | 3 | Garg and Bahl, 2008;<br>Gelsomino et al., 2011;<br>Łukowski and Dec, 2018;                                                                                                                                                           |
| Microaggregate content (<0.25 mm) | ACP <sup>1</sup>      | Negative | 1 | Wei et al., 2014b;                                                                                                                                                                                                                   |
|                                   | ALP <sup>1</sup>      | Negative | 2 | Sharma et al., 2019a;<br>Wei et al., 2014a                                                                                                                                                                                           |

*Table S5. Single and meta-analysis studies of APase response relationships to soil pH and associated factors.*

| Soil pH factor | APase<br>(single <sup>1</sup> or<br>meta-analysis <sup>2</sup><br>study) | Response<br>relationship | Vote<br>counting | Study                                                                                                                                                                                                                                                                                                                                                                                                                                                                                                                                                                                                                                                                                                                                                                                   |
|----------------|--------------------------------------------------------------------------|--------------------------|------------------|-----------------------------------------------------------------------------------------------------------------------------------------------------------------------------------------------------------------------------------------------------------------------------------------------------------------------------------------------------------------------------------------------------------------------------------------------------------------------------------------------------------------------------------------------------------------------------------------------------------------------------------------------------------------------------------------------------------------------------------------------------------------------------------------|
| pH             | ACP <sup>1</sup>                                                         | Negative at<br>pH >7     | 50               | Acosta-Martínez and Tabatai, 2000;<br>Alvarenga et al., 2008;<br>Bachmann et al., 2014;<br>Balota et al., 2011b;<br>Bera et al., 2016;<br>Bi et al., 2020;<br>Biswas et al., 2018;<br>Borase et al., 2021;<br>Caballero Vanegas et al., 2018;<br>Chakrabarti et al., 2000;<br>Chang et al., 2007;<br>Chen et al., 2021a;<br>Dick et al., 2000;<br>Fernández-Calviño et al., 2010<br>Firmano et al., 2021;<br>Futa et al., 2021;<br>Gaiind and Nain, 2015b;<br>Ghiloufi and Chaieb, 2021;<br>Gispert et al., 2013;<br>Gupta et al., 1988;<br>Hu et al., 2019a;<br>Juma and Tabatai, 1988;<br>Katsalirou et al., 2016;<br>Kunito et al., 2001;<br>Laxminarayana K., 2017;<br>Li et al., 2021a;<br>Li et al., 2009;<br>Liu et al., 2008;<br>Martyniuk et al., 2019;<br>Masto et al., 2013; |

Meli et al., 2002;  
Mullen et al., 1998;  
Nakas et al., 1987;  
Nedunchezhiyan et al., 2018;  
Nedyalkova et al., 2020;  
Nurulitaa et al., 2016;

|                  |                   |    |                                                                                                                                                                                                                                                                                                                                                                                                                                                                                                                            |
|------------------|-------------------|----|----------------------------------------------------------------------------------------------------------------------------------------------------------------------------------------------------------------------------------------------------------------------------------------------------------------------------------------------------------------------------------------------------------------------------------------------------------------------------------------------------------------------------|
| ACP <sup>2</sup> | Negative at pH >7 | 3  | <p>Ortiz et al., 2020;</p> <p>Pan et al., 2018;</p> <p>Roldán et al., 2007;</p> <p>Singh et al., 2012b;</p> <p>Stege et al., 2009;</p> <p>Sun et al., 2019;</p> <p>Tripathi et al., 2007;</p> <p>Trujillo-Narcía et al., 2019;</p> <p>Turner and Haygarth, 2005;</p> <p>Vanlalveni and Lalfakzuala, 2018;</p> <p>Venkatesan et al., 2006;</p> <p>Wang et al., 2017;</p> <p>Wang et al., 2021c;</p> <p>Woźniak et al., 2022;</p> <p>Janes-Bassett et al., 2022;</p> <p>Pokharel et al., 2020;</p> <p>Sun et al., 2020;</p>  |
| ALP <sup>1</sup> | Positive at pH >7 | 45 | <p>Abdalla and Lager, 2009;</p> <p>Acosta-Martínez and Tabatai, 2000;</p> <p>Bachmann et al., 2014;</p> <p>Basak et al., 2017;</p> <p>Bera et al., 2016;</p> <p>Bi et al., 2020;</p> <p>Biswas et al., 2018;</p> <p>Borase et al., 2021;</p> <p>Caballero Vanegas et al., 2018;</p> <p>Carpenter-Boggs et al., 2003;</p> <p>Chang et al., 2007;</p> <p>Dick et al., 1988;</p> <p>Dick et al., 2000;</p> <p>Dinesh et al., 1998;</p> <p>Firmano et al., 2021;</p> <p>Gelsomino et al., 2011;</p> <p>Graça et al., 2021;</p> |

|                                |                  |                      |   |                                                                                                                                                                                                                                                                                                                                                                                                                                                                                                                                                                                                                                                                                                                                                                                                               |
|--------------------------------|------------------|----------------------|---|---------------------------------------------------------------------------------------------------------------------------------------------------------------------------------------------------------------------------------------------------------------------------------------------------------------------------------------------------------------------------------------------------------------------------------------------------------------------------------------------------------------------------------------------------------------------------------------------------------------------------------------------------------------------------------------------------------------------------------------------------------------------------------------------------------------|
|                                |                  |                      |   | <p>Guo et al., 2009</p> <p>Gupta et al., 1988;</p> <p>Katsalirou et al., 2016;</p> <p>Kunito et al., 2001;</p> <p>Laxminarayana K., 2017;</p> <p>Li et al., 2017a;</p> <p>Li et al., 2009;</p> <p>Madejón et al., 2003;</p> <p>Mandal et al., 2018;</p> <p>Melero et al., 2008a</p> <p>Melero et al., 2009;</p> <p>Meli et al., 2002;</p> <p>Monkiedje et al., 2006;</p> <p>Nath et al., 2021;</p> <p>Nedunchezhiyan et al., 2018;</p> <p>Rouydel et al., 2021;</p> <p>Senwo et al., 2007</p> <p>Shi et al., 2020;</p> <p>Siebielec et al., 2018;</p> <p>Singh et al., 2012b;</p> <p>Singh et al., 2020;</p> <p>Stege et al., 2009;</p> <p>Tavali et al., 2021;</p> <p>Tripathi et al., 2007;</p> <p>Truu et al., 2008;</p> <p>Wang et al., 2022c;</p> <p>Wojewódzki et al., 2022;</p> <p>Yu et al., 2021</p> |
|                                | ALP <sup>2</sup> | Positive at pH<br>>7 | 3 | <p>Janes-Bassett et al., 2022;</p> <p>Pokharel et al., 2020;</p> <p>Sun et al., 2020;</p>                                                                                                                                                                                                                                                                                                                                                                                                                                                                                                                                                                                                                                                                                                                     |
| Cation<br>exchange<br>capacity | ACP <sup>1</sup> | Positive             | 1 | Gonnety et al., 2012;                                                                                                                                                                                                                                                                                                                                                                                                                                                                                                                                                                                                                                                                                                                                                                                         |
|                                |                  | Negative             | 1 | Senwo et al., 2007;                                                                                                                                                                                                                                                                                                                                                                                                                                                                                                                                                                                                                                                                                                                                                                                           |
|                                | ALP <sup>1</sup> | Positive             | 1 | Gonnety et al., 2012;                                                                                                                                                                                                                                                                                                                                                                                                                                                                                                                                                                                                                                                                                                                                                                                         |

|                                |                  |          |   |                                                                                                                                                                         |
|--------------------------------|------------------|----------|---|-------------------------------------------------------------------------------------------------------------------------------------------------------------------------|
|                                |                  | Negative | 1 | Senwo et al., 2007;<br>Valarini et al., 2003;                                                                                                                           |
| Electrical conductivity        | ACP <sup>1</sup> | Positive | 3 | Arora et al., 2021;<br><br>Liu et al., 2008;<br>Venkatesan et al., 2006;                                                                                                |
|                                | ALP <sup>1</sup> | Positive | 7 | Al-Taweel et al., 2019;<br>Arora et al., 2021;<br>Guo et al., 2009;<br>Melero et al., 2008a;<br>Melero et al., 2009;<br>Monkiedje et al., 2006;<br>Singh et al., 2012b; |
| Chlorine anion content         | ACP <sup>1</sup> | Negative | 1 | Dinesh et al., 1995;                                                                                                                                                    |
| Carbonate content              | ACP <sup>1</sup> | Negative | 2 | Dick et al., 2000;<br><br>Siddaramappa et al., 1994;                                                                                                                    |
|                                | ALP <sup>1</sup> | Positive | 2 | Dick et al., 2000;<br>Mahmood et al., 2022;                                                                                                                             |
| Iron content                   | ACP <sup>1</sup> | Positive | 1 | Maini et al., 2022;                                                                                                                                                     |
|                                | ALP <sup>1</sup> | Positive | 3 | Maini et al., 2022;<br>Senwo et al., 2007;<br>Yu et al., 2006;                                                                                                          |
| Exchangeable aluminium content | ACP <sup>1</sup> | Positive | 1 | Meena et al., 2021;                                                                                                                                                     |

*Table S6. Single studies of APase response relationships to levels of soil salinity.*

| APase | Response relationship | Vote counting | Study                                                                            |
|-------|-----------------------|---------------|----------------------------------------------------------------------------------|
| ACP   | Negative              | 3             | Garcia and Hernández, 1996;<br>Rouydel et al., 2021;<br>Sadeghi and Taban, 2021; |
| ALP   | Negative              | 2             | Al-Taweel et al., 2019;<br>Fitriatin et al., 2018;                               |



*Table S7. Single and meta-analysis studies of APase response relationships to soil carbon content.*

| Soil carbon variable       | APase (single <sup>1</sup> or meta-analysis <sup>2</sup> study) | Response relationship | Vote counting | Study                                                                                                                                                                                                                                                                                                                                                                                                                                                                                                                                                                                                                                                                                                                                                                                                                                                                                                               |
|----------------------------|-----------------------------------------------------------------|-----------------------|---------------|---------------------------------------------------------------------------------------------------------------------------------------------------------------------------------------------------------------------------------------------------------------------------------------------------------------------------------------------------------------------------------------------------------------------------------------------------------------------------------------------------------------------------------------------------------------------------------------------------------------------------------------------------------------------------------------------------------------------------------------------------------------------------------------------------------------------------------------------------------------------------------------------------------------------|
| Soil organic carbon/matter | ACP <sup>1</sup>                                                | Positive              | 53            | <p>Acosta-Martínez et al., 2003b;</p> <p>Acosta-Martínez et al., 2004;</p> <p>Avila-Salem et al., 2020;</p> <p>Babu et al., 2020;</p> <p>Baligar et al., 2005;</p> <p>Balota et al., 2011b;</p> <p>Bobul'ská et al., 2015;</p> <p>Borase et al., 2021;</p> <p>Butterly et al., 2011;</p> <p>Chang et al., 2007;</p> <p>Chellappa et al., 2021;</p> <p>Chen et al., 2021c;</p> <p>Choudhary et al., 2021;</p> <p>D'Ascoli et al., 2006;</p> <p>de Varennes and Torres, 2011;</p> <p>Eivazi et al., 2003;</p> <p>Evald et al., 2021;</p> <p>Fernández-Calviño et al., 2010;</p> <p>Gaind and Singh, 2016;</p> <p>Green et al., 2007;</p> <p>Hazarika et al., 2009;</p> <p>Katsalirou et al., 2016;</p> <p>Laxminarayana K., 2017;</p> <p>Li et al., 2021a;</p> <p>Lungmuana et al., 2019;</p> <p>Mahajan et al., 2021;</p> <p>Maini et al., 2022;</p> <p>McCallister et al., 2002;</p> <p>Monkiedje et al., 2006;</p> |

|                  |          |    |                                                                                                                                                                                                                                                                                                                                                                                                                                                                                                                                                                                                                     |
|------------------|----------|----|---------------------------------------------------------------------------------------------------------------------------------------------------------------------------------------------------------------------------------------------------------------------------------------------------------------------------------------------------------------------------------------------------------------------------------------------------------------------------------------------------------------------------------------------------------------------------------------------------------------------|
|                  |          |    | Mullen et al., 1998;<br>Omenda et al., 2019;<br>Pan et al., 2018;<br>Ramdas et al., 2016;<br>Rietz and Haynes, 2003;<br>Roy et al., 2019;<br>Sangma et al., 2016;<br>Šarapatka et al., 2004;<br>Sarkar et al., 2020;<br>Sharma et al., 2013a;<br>Sharma et al., 2019a;<br>Singh et al., 2018b;<br>Singh et al., 2021;<br>Siwik-Ziomek et al., 2014;<br>Soon et al., 2000;<br>Sudhakaran et al., 2019;<br>Tarafdar et al., 1989;<br>Truu et al., 2008;<br>Tuti et al., 2020;<br>Venkatesan et al., 2006;<br>Wang et al., 2011b;<br>Wei et al., 2017;<br>Yu et al., 2006;<br>Zuazo et al., 2020;<br>Sun et al., 2020; |
| ACP <sup>2</sup> | Positive | 1  |                                                                                                                                                                                                                                                                                                                                                                                                                                                                                                                                                                                                                     |
| ALP <sup>1</sup> | Positive | 47 | Acosta-Martínez et al., 2003b;<br>Acosta-Martínez et al., 2004;<br>Arora et al., 2021;<br>Bhattachayya et al., 2008;<br>Blaise and Rao, 2004;<br>Bobul'ská et al., 2015;<br>Borase et al., 2020;<br>Borase et al., 2021;<br>Cao et al., 2022;<br>Cattaneo et al., 2014;<br>Chang et al., 2007;                                                                                                                                                                                                                                                                                                                      |

Chocano et al., 2016;  
Choudhary et al., 2018c;  
Choudhary et al., 2021;  
Cui et al., 2015;  
Eivazi et al., 2003;  
Gaind and Singh, 2016;  
Gangwar et al., 2021;  
Ghosh et al., 2019;  
Laxminarayana K., 2017;  
Li et al., 2017b;  
Liu et al., 2017;  
Łukowski and Dec, 2018;  
Lungmuana et al., 2019;  
Madejón et al., 2007;  
Maini et al., 2022;  
Melero et al., 2006;  
Mullen et al., 1998;  
Rietz and Haynes, 2003;  
Roy et al., 2019;  
Sepat et al., 2014;  
Sharma et al., 2015;  
Sharma et al., 2019a;  
Shi et al., 2020;  
Singh et al., 2018b;  
Singh et al., 2021;  
Siwik-Ziomek et al., 2014;  
Sudhakaran et al., 2019;  
Tarafdar et al., 1989;  
Truu et al., 2008;  
Tuti et al., 2020;  
Vekemans et al., 1989;  
Verma et al., 2016a;  
Wang et al., 2011b;  
Yu et al., 2006;  
Yu et al., 2021;  
Zhao et al., 2009;

|                          |                  |          |    |                                                                                                                                                                                                                                                                                     |
|--------------------------|------------------|----------|----|-------------------------------------------------------------------------------------------------------------------------------------------------------------------------------------------------------------------------------------------------------------------------------------|
|                          | ALP <sup>2</sup> | Positive | 1  | Pokharel et al., 2020;                                                                                                                                                                                                                                                              |
| Total organic carbon     | ACP <sup>1</sup> | Positive | 10 | Borase et al., 2021;<br><br>da Silva Xavier et al., 2020;<br>Franco-Otero et al., 2012;<br>Futa et al., 2021;<br>Gelsomino et al., 2011;<br>Kobierski and Lemanowicz, 2016;<br>Kobierski et al., 2017;<br>Liu et al., 2008;<br>Sarkar et al., 2009;<br>Tiecher et al., 2017;        |
|                          |                  | Negative | 1  | Wojewódzki et al., 2022;                                                                                                                                                                                                                                                            |
|                          | ALP <sup>1</sup> | Positive | 11 | Bera et al., 2016;<br>Borase et al., 2021;<br>Futa et al., 2021;<br>Guo et al., 2009;<br>Kobierski and Lemanowicz, 2016;<br>Melero et al., 2007b;<br>Melero et al., 2008a;<br>Melero et al., 2009;<br>Melero Sánchez et al., 2008;<br>Sarkar et al., 2009;<br>Sharma et al., 2019b; |
| Dissolved organic carbon | ACP <sup>1</sup> | Positive | 3  | Basak and Gajbhiye, 2018;<br><br>Franco-Otero et al., 2012;<br>Hazarika et al., 2009;                                                                                                                                                                                               |
|                          | ALP <sup>1</sup> | Positive | 5  | Basak and Gajbhiye, 2018;<br>Calvarro et al., 2014;<br>Madejón et al., 2007;<br>Sharma et al., 2019b;<br>Wojewódzki et al., 2022;                                                                                                                                                   |

*Table S8. Single and meta-analysis studies of APase response relationships to soil content of nitrogen forms and soil C:N ratios.*

| <b>Nitrogen form/ratio</b>       | <b>APase (single<sup>1</sup> or meta-analysis<sup>2</sup> study)</b> | <b>Response relationship</b> | <b>Vote counting</b> | <b>Study</b>                                                                                                                                                                                                                                                                                                                                                                                      |
|----------------------------------|----------------------------------------------------------------------|------------------------------|----------------------|---------------------------------------------------------------------------------------------------------------------------------------------------------------------------------------------------------------------------------------------------------------------------------------------------------------------------------------------------------------------------------------------------|
| Nitrate nitrogen                 | ACP <sup>1</sup>                                                     | Positive                     | 1                    | Roy et al., 2019;                                                                                                                                                                                                                                                                                                                                                                                 |
|                                  |                                                                      | Negative                     | 2                    | Schaller K., 2003;<br>Wang et al., 2021c;                                                                                                                                                                                                                                                                                                                                                         |
|                                  | ALP <sup>1</sup>                                                     | Positive                     | 1                    | Roy et al., 2019;                                                                                                                                                                                                                                                                                                                                                                                 |
|                                  |                                                                      | Negative                     | 1                    | Verma et al., 2016a;                                                                                                                                                                                                                                                                                                                                                                              |
|                                  |                                                                      | None                         | 2                    | Adrover et al., 2017;<br>Wang et al., 2022b;                                                                                                                                                                                                                                                                                                                                                      |
| Ammonium nitrogen                | ACP <sup>1</sup>                                                     | Positive                     | 2                    | Liu et al., 2008;<br>Roy et al., 2019;                                                                                                                                                                                                                                                                                                                                                            |
|                                  |                                                                      | None                         | 1                    | Wang et al., 2013a;                                                                                                                                                                                                                                                                                                                                                                               |
|                                  | ALP <sup>1</sup>                                                     | Positive                     | 2                    | Roy et al., 2019;<br>Monkiedje et al., 2006;                                                                                                                                                                                                                                                                                                                                                      |
|                                  |                                                                      | None                         | 1                    | Wang et al., 2022a;                                                                                                                                                                                                                                                                                                                                                                               |
| Total nitrogen (Kjeldahl method) | ACP <sup>1</sup>                                                     | Positive                     | 15                   | Baligar et al., 2005;<br>Chen et al., 2021b;<br>Chen et al., 2021a;<br>Fernández-Calviño et al., 2010;<br>Gelsomino et al., 2011;<br>Green et al., 2007;<br>Katsalirou et al., 2016;<br>Laxminarayana K., 2017;<br>Li et al., 2021a;<br>Mandal et al., 2007;<br>Qaswar et al., 2019;<br>Sudhakaran et al., 2019;<br>Tamilselvi et al., 2015;<br>Turner and Haygarth, 2005;<br>Wang et al., 2011b; |
|                                  |                                                                      |                              |                      |                                                                                                                                                                                                                                                                                                                                                                                                   |
|                                  |                                                                      |                              |                      |                                                                                                                                                                                                                                                                                                                                                                                                   |
|                                  |                                                                      |                              |                      |                                                                                                                                                                                                                                                                                                                                                                                                   |
|                                  |                                                                      |                              |                      |                                                                                                                                                                                                                                                                                                                                                                                                   |
|                                  | ACP <sup>2</sup>                                                     | Positive                     | 1                    | Sun et al., 2020;                                                                                                                                                                                                                                                                                                                                                                                 |
|                                  | ALP <sup>1</sup>                                                     | Positive                     | 18                   | Acosta-Martínez et al., 2004;<br>Cattaneo et al., 2014;                                                                                                                                                                                                                                                                                                                                           |

|                |                  |          |   |                                                                                                                                                                                                                                                                                                                                                                                                     |
|----------------|------------------|----------|---|-----------------------------------------------------------------------------------------------------------------------------------------------------------------------------------------------------------------------------------------------------------------------------------------------------------------------------------------------------------------------------------------------------|
|                |                  |          |   | Dinesh et al., 1998;<br>Gelsomino et al., 2011;<br>Guo et al., 2009;<br>Katsalirou et al., 2016;<br>Laxminarayana K., 2017;<br>Li et al., 2017a;<br>Liu et al., 2017;<br>Mandal et al., 2007;<br>Melero et al., 2007b;<br>Melero Sánchez et al., 2008;<br>Shi et al., 2020;<br>Tan et al., 2014;<br>Truu et al., 2008;<br>Vekemans et al., 1989;<br>Wang et al., 2011b;<br>Wojewódzki et al., 2022; |
| Soil C:N ratio | ACP <sup>1</sup> | Positive | 1 | Liu et al., 2008;                                                                                                                                                                                                                                                                                                                                                                                   |
|                | ALP <sup>1</sup> | Positive | 1 | Singh and Ghoshal, 2013;                                                                                                                                                                                                                                                                                                                                                                            |

*Table S9. Single and meta-analysis studies of APase response relationships to soil content of phosphorus forms and carbon:phosphorus ratios.*

| Phosphorus form/ratio            | APase (single <sup>1</sup> or meta-analysis <sup>2</sup> study) | Response relationship | Vote counting | Study                                                                                                                                                                                                                                                                       |
|----------------------------------|-----------------------------------------------------------------|-----------------------|---------------|-----------------------------------------------------------------------------------------------------------------------------------------------------------------------------------------------------------------------------------------------------------------------------|
| Labile inorganic phosphorus (Pi) | ACP <sup>1</sup>                                                | Negative              | 10            | Alves et al., 2021;<br>Arruda et al., 2018;<br><br>Castillo et al., 2017;<br>Gao et al., 2016;<br>Ohm et al., 2017;<br>Romanya et al., 2017;<br>Schoebitz et al., 2020;<br>Simanca Fontalvo and Cuervo Andrade, 2018;<br>Tarafdar and Claassen, 1988;<br>Teng et al., 2013; |
|                                  | ALP <sup>1</sup>                                                | Negative              | 5             | Fereidooni et al., 2013;                                                                                                                                                                                                                                                    |

|                          |                  |          |    |                                                                                                                                                                                                                                                                                                                                                                                                                                                                                                                                                                                                                                                                                               |
|--------------------------|------------------|----------|----|-----------------------------------------------------------------------------------------------------------------------------------------------------------------------------------------------------------------------------------------------------------------------------------------------------------------------------------------------------------------------------------------------------------------------------------------------------------------------------------------------------------------------------------------------------------------------------------------------------------------------------------------------------------------------------------------------|
|                          |                  |          |    | Mahmood et al., 2022;<br>Niewiadomska et al., 2020a;<br>Recena et al., 2015;<br>Simanca Fontalvo and Cuervo Andrade, 2018;                                                                                                                                                                                                                                                                                                                                                                                                                                                                                                                                                                    |
| Soil solution phosphorus | ACP <sup>1</sup> | Positive | 23 | Arora et al., 2021;<br><br>Atoloye et al., 2021;<br>Babu et al., 2020;<br>Futa et al., 2021;<br>Guo et al., 2009;<br>Kamh et al., 1999;<br>Kobierski and Lemanowicz, 2016;<br>Kobierski et al., 2017;<br>Laxminarayana K., 2017;<br>Li et al., 2018a;<br>Liu et al., 2008;<br>Lungmuana et al., 2019;<br>Mahajan et al., 2021;<br>Maini et al., 2022;<br>Nedunchezhiyan et al., 2018;<br>Ortiz et al., 2020;<br>Qaswar et al., 2019;<br>Sharma et al., 2019a;<br>Sharpley et al., 1995;<br>Singh et al., 2012a;<br>Tarafdar et al., 1989;<br>Yuan et al., 2022;<br>Zhong et al., 2007;<br>Saha et al., 2008a;<br>Koczorski et al., 2021;<br>Waldrop et al., 2000;<br>Wojewódzki et al., 2022; |
|                          |                  | Negative | 1  |                                                                                                                                                                                                                                                                                                                                                                                                                                                                                                                                                                                                                                                                                               |
|                          |                  | None     | 3  |                                                                                                                                                                                                                                                                                                                                                                                                                                                                                                                                                                                                                                                                                               |
|                          | ALP <sup>1</sup> | Positive | 16 | Arora et al., 2021;<br>Futa et al., 2021;<br>Garg and Bahl, 2008;                                                                                                                                                                                                                                                                                                                                                                                                                                                                                                                                                                                                                             |

|                  |                  |          |   |                                                                                                                                                                                                                                                                                                                                   |
|------------------|------------------|----------|---|-----------------------------------------------------------------------------------------------------------------------------------------------------------------------------------------------------------------------------------------------------------------------------------------------------------------------------------|
|                  |                  |          |   | Guo et al., 2021;<br>Kobierski and Lemanowicz, 2016;<br>Laxminarayana K., 2017;<br>Liu et al., 2017;<br>Lungmuana et al., 2019;<br>Maini et al., 2022;<br>Sharma et al., 2019a;<br>Tarafdar et al., 1989;<br>Verma et al., 2016a;<br>Wang et al., 2021a;<br>Wang et al., 2021b;<br>Wojewódzki et al., 2022;<br>Zhao et al., 2009; |
|                  |                  | Negative | 2 | Madejón et al., 2003;<br>Saha et al., 2008a;                                                                                                                                                                                                                                                                                      |
|                  |                  | None     | 2 | Koczorski et al., 2021;<br>Wang et al., 2022a;                                                                                                                                                                                                                                                                                    |
| Olsen phosphorus | ACP <sup>1</sup> | Positive | 7 | Basak et al., 2017;<br>Basak and Gajbhiye, 2018;<br>Moharana et al., 2022;<br>Roy et al., 2019;<br>Singh et al., 2018b;<br>Yin et al., 2021;<br>Zhang et al., 2019a;                                                                                                                                                              |
|                  | ACP <sup>1</sup> | Negative | 1 | Wang et al., 2021c;                                                                                                                                                                                                                                                                                                               |
|                  | ACP <sup>2</sup> | Negative | 1 | Sun et al., 2020;                                                                                                                                                                                                                                                                                                                 |
|                  | ALP <sup>1</sup> | Positive | 8 | Atoloye et al., 2021;<br>Basak and Gajbhiye, 2018;<br>Melero et al., 2007b;<br>Melero Sánchez et al., 2008;<br>Moharana et al., 2022;<br>Roy et al., 2019;<br>Sharma et al., 2015;<br>Singh et al., 2018b;                                                                                                                        |
|                  |                  | Negative | 4 | Fraser et al., 2015;<br>Katsalirou et al., 2016;                                                                                                                                                                                                                                                                                  |



|                                |                  |          |   |                                                                                                                                                       |
|--------------------------------|------------------|----------|---|-------------------------------------------------------------------------------------------------------------------------------------------------------|
|                                |                  |          |   | Soni et al., 2021;<br>Yu et al., 2006;                                                                                                                |
| Organic phosphorus             | ACP <sup>1</sup> | Positive | 6 | Moharana et al., 2022;<br><br>Silva et al., 2015;<br>Tarafdar et al., 1989;<br>Turner and Haygarth, 2005;<br>Wang et al., 2011c;<br>Wei et al., 2021; |
|                                | ALP <sup>1</sup> | Positive | 5 | Dey et al., 2019;<br>Guo et al., 2009;<br>Moharana et al., 2022;<br>Recena et al., 2015;<br>Tarafdar et al., 1989;                                    |
| Labile organic phosphorus (Po) | ACP <sup>1</sup> | Negative | 3 | Kamh et al., 1999;<br>Wang et al., 2022b;<br><br>Wu et al., 2012;                                                                                     |
|                                | ACP <sup>2</sup> | Negative | 1 | Sun et al., 2020;                                                                                                                                     |
|                                | ALP <sup>1</sup> | Negative | 1 | de Santiago-Martín et al., 2013;                                                                                                                      |
| Soil carbon: phosphorus ratio  | ACP <sup>1</sup> | Positive | 1 | Li et al., 2021a;                                                                                                                                     |

*Table S10. Single studies of APase response relationships to soil available potassium content.*

| APase | Response relationship | Vote counting | Study                                                                                                                                                          |
|-------|-----------------------|---------------|----------------------------------------------------------------------------------------------------------------------------------------------------------------|
| ACP   | Positive              | 6             | Arora et al., 2021;<br>Koczorski et al., 2021;<br>Laxminarayana K., 2017;<br>Mahajan et al., 2021;<br>Nedunchezhiyan et al., 2018;<br>Venkatesan et al., 2006; |
| ALP   | Positive              | 6             | Arora et al., 2021;<br>Koczorski et al., 2021;<br>Laxminarayana K., 2017;<br>Roy et al., 2019;                                                                 |

*Table S11. Single and meta-analysis studies of APase response relationships to land use change.*

| Land use                                  | APase<br>(single <sup>1</sup> or<br>meta-analysis <sup>2</sup><br>study) | Response<br>relationship | Vote<br>counting | Study                                                                                                                                                                                                                                                                                                                                                                                                                                                                                                                                                                                                                                              |
|-------------------------------------------|--------------------------------------------------------------------------|--------------------------|------------------|----------------------------------------------------------------------------------------------------------------------------------------------------------------------------------------------------------------------------------------------------------------------------------------------------------------------------------------------------------------------------------------------------------------------------------------------------------------------------------------------------------------------------------------------------------------------------------------------------------------------------------------------------|
| Ungrazed<br>grassland,<br>meadow, pasture | ACP <sup>1</sup>                                                         | Positive                 | 25               | Acosta-Martínez et al., 2008;<br><br>Avila-Salem et al., 2020;<br>Carlos et al., 2022;<br>Chen et al., 2004;<br>Damian et al., 2021;<br>Gonnety et al., 2012;<br>Graça et al., 2021;<br>Izquierdo et al., 2003;<br>Katsalirou et al., 2016;<br>Kremer and Li, 2003;<br>Lebrun et al., 2012;<br>Li et al., 2017b;<br>Notaro et al., 2018;<br>Ohm et al., 2017;<br>Pan et al., 2018;<br>Pankhurst et al., 1995;<br>Paz-Ferreiro et al., 2009;<br>Raiesi F., 2007<br>Reardon et al., 2016;<br>Šarapatka et al., 2004;<br>Serri et al., 2018;<br>Shi et al., 2013;<br>Silvestro et al., 2017;<br>Tiecher et al., 2012;<br>Vinhai-Freitas et al., 2017; |
|                                           | ALP <sup>1</sup>                                                         | Positive                 | 13               | Acosta-Martínez et al., 2008;<br>Cattaneo et al., 2014;<br>Cui et al., 2019;<br>Dong et al., 2016;<br>Gonnety et al., 2012;<br>Graça et al., 2021;<br>Katsalirou et al., 2016;<br>Kremer and Li, 2003;                                                                                                                                                                                                                                                                                                                                                                                                                                             |

|                               |                       |          |    |                                                                                                                                                                                                                                                                                                         |
|-------------------------------|-----------------------|----------|----|---------------------------------------------------------------------------------------------------------------------------------------------------------------------------------------------------------------------------------------------------------------------------------------------------------|
|                               |                       |          |    | Lebrun et al., 2012;<br>Notaro et al., 2018;<br>Ohm et al., 2017;<br>Raiesi F., 2007;<br>Saviozzi et al., 2001;                                                                                                                                                                                         |
| Revegetation                  |                       |          |    |                                                                                                                                                                                                                                                                                                         |
| Natural vegetation            | ACP <sup>1</sup>      | Positive | 1  | Aon and Colaneri, 2001;                                                                                                                                                                                                                                                                                 |
| Non cultivated                | ACP <sup>1</sup>      | Positive | 1  | Dick et al., 1994                                                                                                                                                                                                                                                                                       |
| Recolonization trees          | ACP <sup>1</sup>      | Positive | 1  | Garcia et al., 1997;                                                                                                                                                                                                                                                                                    |
| Reconstruction prairie        | ACP <sup>1</sup>      | Positive | 1  | García-Orenes et al., 2010;                                                                                                                                                                                                                                                                             |
| Spontaneous recovery          | ACP <sup>1</sup>      | Positive | 3  | Li et al., 2021a;<br><br>Lungmuana et al., 2019;<br>Sciubba et al., 2021;                                                                                                                                                                                                                               |
| Plant invasion                | ACP, ALP <sup>2</sup> | Positive | 1  | Margalef et al., 2021;                                                                                                                                                                                                                                                                                  |
| Forest clearance for cropland | ACP <sup>1</sup>      | Negative | 11 | Barcelos Martins et al., 2019;<br><br>Caravaca et al., 2002;<br>de Oliveira Silva et al., 2019;<br>Dormaar and Willms, 2000;<br>Garcia et al., 1997;<br>Guo et al., 2009<br>Hernández-Vigoa et al., 2018<br>Katsalirou et al., 2016;<br>Leirós et al., 1999;<br>Raiesi F., 2007;<br>Serri et al., 2018; |
|                               | ALP <sup>1</sup>      | Negative | 3  | Guo et al., 2009;<br>Katsalirou et al., 2016;<br>Raiesi F., 2007                                                                                                                                                                                                                                        |
| Afforestation                 | ACP <sup>1</sup>      | Positive | 10 | Arora et al., 2021;<br>Brackin et al., 2014;<br>Figueira da Silva et al., 2020;<br>Garcia et al., 1997;<br>Kooch et al., 2019;<br>Li et al., 2021a;<br>Martins Sousa et al., 2020;<br>Nurulitaa et al., 2016;<br>Singh et al., 2012a;<br>Ventura et al., 2021;                                          |
|                               | ALP <sup>1</sup>      | Positive | 7  | Arora et al., 2021;<br>Cui et al., 2019;<br>Dilly O., 1999;<br>Lungmuana et al., 2019;                                                                                                                                                                                                                  |

*Table S12. Single studies of APase response relationships to crop rotation composition and cover cropping.*

| Crop rotation type/property | APase | Response relationship | Vote counting | Study                                                                                                                                                                                                                                                                                                                                                             |
|-----------------------------|-------|-----------------------|---------------|-------------------------------------------------------------------------------------------------------------------------------------------------------------------------------------------------------------------------------------------------------------------------------------------------------------------------------------------------------------------|
| Crop rotation               | ACP   | Positive              | 14            | Alvey et al., 2001;<br>Chen et al., 2018;<br>Eichler-Löbermann et al., 2021;<br>Ferrerias et al., 2009;<br>He et al., 2010;<br>Inal et al., 2007;<br>Jain et al., 2018;<br>Koczorski et al., 2021;<br>Nayyar et al., 2009<br>Qaswar et al., 2019;<br>Redel et al., 2011;<br>Siwik-Ziomek et al., 2014;<br>Woźniak and Kawecka-Radomska, 2016;<br>Yu et al., 2021; |
|                             | ALP   | Positive              | 13            | Acosta-Martínez et al., 2003a;<br>Acosta-Martínez et al., 2011a;<br>Alvey et al., 2001;<br>Borase et al., 2020;<br>Eichler-Löbermann et al., 2021;<br>Gou et al., 2020;<br>Habig and Swanepoel, 2018;<br>He et al., 2010<br>Jain et al., 2018;<br>Koczorski et al., 2021;<br>Saad et al., 2018;<br>Siwik-Ziomek et al., 2014;<br>Yu et al., 2021;                 |
|                             | ACP   | Positive              | 2             | Eichler-Löbermann et al., 2021;<br>Nath et al., 2021;                                                                                                                                                                                                                                                                                                             |
| Cereal-legumes              | ALP   | Positive              | 2             | Eichler-Löbermann et al., 2021;                                                                                                                                                                                                                                                                                                                                   |

|                             |     |          |    |                                                                                                                                                                                                                                                                                                                                            |
|-----------------------------|-----|----------|----|--------------------------------------------------------------------------------------------------------------------------------------------------------------------------------------------------------------------------------------------------------------------------------------------------------------------------------------------|
| Cereal-based                | ACP | Positive | 4  | Nath et al., 2021;<br>Acosta-Martínez et al., 2003b;<br>Chen et al., 2021a;<br>Datta et al., 2021;<br>Dick et al., 1988;                                                                                                                                                                                                                   |
|                             | ALP | Positive | 7  | Acosta-Martínez et al., 2003b;<br>Choudhary et al., 2018b;<br>Datta et al., 2021;<br>Dick et al., 1988;<br>Gajda and Martyniuk, 2005;<br>Wick et al., 1998;<br>Zhang et al., 2018;                                                                                                                                                         |
| Cover crops                 | ACP | Positive | 13 | Adetunji et al., 2021;<br>Boccolini et al., 2019;<br>Chavarría et al., 2016;<br>Cui et al., 2015;<br>de Castro Lopes et al., 2021;<br>Feng et al., 2021;<br>Mullen et al., 1998;<br>Pérez Brandan et al., 2017;<br>Ramos et al., 2011;<br>Ramos et al., 2010;<br>Stegarescu et al., 2021;<br>Takeda et al., 2009;<br>Ventura et al., 2021; |
|                             | ALP | Positive | 8  | Cui et al., 2015;<br>Feng et al., 2021;<br>Hai-Ming et al., 2014;<br>Melero et al., 2007a;<br>Mullen et al., 1998;<br>Niewiadomska et al., 2020b;<br>Thapa et al., 2021;<br>Wang et al., 2021b;                                                                                                                                            |
| Intercropping               | ACP | Positive | 4  | Balota et al., 2010;<br>Gunes et al., 2007;<br>Koczorski et al., 2021;<br>Roohi et al., 2020;                                                                                                                                                                                                                                              |
|                             | ALP | Positive | 3  | Koczorski et al., 2021;<br>Roohi et al., 2020;<br>Li et al., 2021b;                                                                                                                                                                                                                                                                        |
| Intercropping+fertilization | ACP | Positive | 1  | Rezaei-Chiyaneh et al., 2021;                                                                                                                                                                                                                                                                                                              |
|                             | ALP | Positive | 3  | Pittarello et al., 2021;<br>Rezaei-Chiyaneh et al., 2021;<br>Wang et al., 2014b;                                                                                                                                                                                                                                                           |

|                             |     |          |    |                                                                                                                                                                                                                                                                      |
|-----------------------------|-----|----------|----|----------------------------------------------------------------------------------------------------------------------------------------------------------------------------------------------------------------------------------------------------------------------|
| Intercropping with legumes  | ACP | Positive | 2  | Balota et al., 2010;<br>Lo Presti et al., 2021;                                                                                                                                                                                                                      |
| Wheat vs maize/rice         | ACP | Positive | 2  | Furtak et al., 2017;<br>Masto et al., 2006;                                                                                                                                                                                                                          |
|                             | ALP | Positive | 3  | Furtak et al., 2017;<br>Masto et al., 2006;<br>Tao et al., 2009;                                                                                                                                                                                                     |
| Legumes vs wheat/rice       | ACP | Positive | 11 | Ansari et al., 2021;<br>Aparna et al., 2016;<br>Borase et al., 2021;<br>Gunes et al., 2007<br>Kumar et al., 2017;<br>Li et al., 2021b;<br>Lo Presti et al., 2021;<br>Nuruzzaman et al., 2006;<br>Ohm et al., 2017;<br>Raghurama et al., 2022;<br>Singh et al., 2021; |
|                             | ALP | Positive | 7  | Acosta-Martínez et al., 2004;<br>Aparna et al., 2016;<br>Borase et al., 2021;<br>Datta et al., 2021;<br>Kumar et al., 2017;<br>Singh et al., 2021;<br>Yu et al., 2021;                                                                                               |
| Horticulture vs maize       | ACP | Positive | 4  | Avila-Salem et al., 2020;<br>Lago et al., 2019;<br>Maini et al., 2022;<br>Monkiedje et al., 2006;                                                                                                                                                                    |
|                             | ALP | Positive | 2  | Maini et al., 2022;<br>Monkiedje et al., 2006;                                                                                                                                                                                                                       |
| Barley vs horticulture      | ACP | Positive | 1  | Moreno et al., 1998;                                                                                                                                                                                                                                                 |
| Monoculture maize vs others | ACP | Positive | 8  | Bossio et al., 2005;<br><br>Dora et al., 2006;<br>Fialho et al., 2008;<br>Mankolo et al., 2006;<br>Roohi et al., 2020;<br>Savin et al., 2009;<br>Serafim et al., 2019;<br>Wang et al., 2017;                                                                         |
|                             | ALP | Positive | 4  | Bossio et al., 2005;<br>Dora et al., 2006;<br>Roohi et al., 2020;                                                                                                                                                                                                    |

|                                         |     |          |   |                                                                                                                           |
|-----------------------------------------|-----|----------|---|---------------------------------------------------------------------------------------------------------------------------|
| Monoculture lupine vs others            | ACP | Positive | 4 | Savin et al., 2009;<br>Lo Presti et al., 2021;<br>Redel et al., 2007;<br>Schoebitz et al., 2020;<br>Touhami et al., 2021; |
|                                         | ALP | Positive | 2 | Touhami et al., 2021;<br>Wyszkowska et al., 2019;                                                                         |
| Monoculture sorghum vs others           | ACP | Positive | 2 | Alvey et al., 2001;<br>Neal et al., 2021;                                                                                 |
|                                         | ALP | Positive | 2 | Dou et al., 2016;<br>Neal et al., 2021;                                                                                   |
| Monoculture transgenic cotton vs cotton | ACP | Positive | 2 | Beura and Rakshit, 2013;<br>Sarkar et al., 2009;                                                                          |
|                                         | ALP | Positive | 3 | Beura and Rakshit, 2013;<br>Mandal et al., 2018;<br>Sarkar et al., 2009;                                                  |
| Monoculture transgenic rice vs rice     | ACP | None     | 2 | Zhaolei et al., 2017;<br>Wei et al., 2012                                                                                 |

Table S13. Single studies of response relationships of APase to tillage practices.

| Tillage practice               | APase | Response relationship | Vote counting | Study                                                                                                                                                                                                  |
|--------------------------------|-------|-----------------------|---------------|--------------------------------------------------------------------------------------------------------------------------------------------------------------------------------------------------------|
| Conventional tillage vs others | ACP   | Positive              | 4             | Acosta-Martínez et al., 2003b;<br>de Varennes and Torres, 2011;<br>Niewiadomska et al., 2016;<br>Woźniak, A., 2019;                                                                                    |
|                                |       | Negative              | 8             | Balota et al., 2004;<br>Balota et al., 2011a;<br>Bini et al., 2014;<br>Carter et al., 2007<br>Farhangi-Abriz et al., 2021;<br>Jaskulska R., 2020a;<br>Peixoto et al., 2010<br>Swędryńska et al., 2013; |
|                                | ALP   | Positive              | 4             | Acosta-Martínez et al., 2003a;<br>Acosta-Martínez et al., 2003b;<br>Niewiadomska et al., 2016;<br>Soni et al., 2021;                                                                                   |
|                                |       | Negative              | 3             | Balota et al., 2004;<br>Jaskulska R., 2020a;<br>Niewiadomska et al., 2020b;                                                                                                                            |

|                                         |     |          |    |                                                                                                                                                                                                                                                                                                                                                                                                                                                                                                                                                                                                           |
|-----------------------------------------|-----|----------|----|-----------------------------------------------------------------------------------------------------------------------------------------------------------------------------------------------------------------------------------------------------------------------------------------------------------------------------------------------------------------------------------------------------------------------------------------------------------------------------------------------------------------------------------------------------------------------------------------------------------|
| Reduced tillage vs conventional tillage | ACP | Positive | 5  | Farhangi-Abriz et al., 2021;<br>Gajda and Przewłoka, 2012;<br>Jaskulska R., 2020a;<br>Ventura et al., 2021;<br>Woźniak and Kawecka-Radomska, 2016;                                                                                                                                                                                                                                                                                                                                                                                                                                                        |
|                                         | ALP | Positive | 2  | Madejón et al., 2007<br>Zibilske and Bradford, 2003;                                                                                                                                                                                                                                                                                                                                                                                                                                                                                                                                                      |
| No till vs others                       | ACP | Positive | 24 | Balota et al., 2004;<br>Balota et al., 2011a;<br>Barcelos Martins et al., 2019;<br>Caballero Vanegas et al., 2018;<br>Campbell et al., 1989;<br>Chellappa et al., 2021;<br>Eivazi et al., 2003;<br>Green et al., 2007;<br>Hatti et al., 2018;<br>Hazarika et al., 2009;<br>Hu et al., 2019b;<br>Kumar et al., 2017;<br>Mina et al., 2008<br>Nath et al., 2017;<br>Omid et al., 2008<br>Peixoto et al., 2020<br>Redel et al., 2011;<br>Roldán et al., 2007;<br>Sepat et al., 2014;<br>Silvestro et al., 2017;<br>Ventura et al., 2021;<br>Wang et al., 2011a;<br>Wang et al., 2011b;<br>Yang et al., 2019; |
|                                         | ALP | Positive | 21 | Acosta-Martinez et al., 2011a;<br>Balota et al., 2004;<br>Bergstrom et al., 1998b;<br>Caballero Vanegas et al., 2018;<br>Carpenter-Boggs et al., 2003;<br>Choudhary et al., 2018a;<br>Habig and Swanepoel, 2018;<br>Kumar et al., 2017;<br>Melero et al., 2011;<br>Mina et al., 2008<br>Naragund et al., 2020;<br>Omid et al., 2008                                                                                                                                                                                                                                                                       |



|                                       |     |          |   |                                                                                                                                                                                                                       |
|---------------------------------------|-----|----------|---|-----------------------------------------------------------------------------------------------------------------------------------------------------------------------------------------------------------------------|
|                                       |     |          |   | Parihar et al., 2016;<br>Parihar et al., 2016;<br>Sepat et al., 2014;<br>Shahane et al., 2020;<br>Singh et al., 2022;<br>Wang et al., 2011b;<br>Wei et al., 2014b;<br>Xomphoutheb et al., 2020;<br>Yang et al., 2019; |
| No till + residue retention vs others | ACP | Positive | 9 | Ahmed et al., 2019;<br>Bini et al., 2014;<br>Chellappa et al., 2021;<br>Malobane et al., 2020;<br>Rabary et al., 2008<br>Redel et al., 2007;<br>Redel et al., 2011;<br>Wang et al., 2011a;<br>Cao et al., 2021;       |
|                                       | ALP | Positive | 1 | Wei et al., 2014a;                                                                                                                                                                                                    |
| No till with depth vs others          | ACP | Positive | 5 | Dick W.A., 1984;<br>Doran J.W., 1980;<br>Green et al., 2007;<br>Kumar et al., 2017;<br>Wang et al., 2011a;                                                                                                            |
|                                       | ALP | Positive | 6 | Angers et al., 1993;<br>Dick W.A., 1984;<br>Kharia et al., 2017;<br>Kumar et al., 2017;<br>Parihar et al., 2020;<br>Shi et al., 2012;                                                                                 |

*Table S14. Single and meta-analysis studies of APase response relationships to types of inorganic and organic fertilization and rates.*

| Fertilization type | APase<br>(single <sup>1</sup> or<br>meta-analysis <sup>2</sup><br>study) | Response<br>relationship | Vote<br>counting | Study                                                                    |
|--------------------|--------------------------------------------------------------------------|--------------------------|------------------|--------------------------------------------------------------------------|
| Liming             | ACP <sup>1</sup>                                                         | Positive                 | 3                | Bardgett and Leemans, 1995;<br>Meena et al., 2021;<br>Shi et al., 2019a; |
|                    |                                                                          | Negative                 | 2                | Makoi et al., 2010<br>Siddaramappa et al., 1994;                         |
|                    | ALP <sup>1</sup>                                                         | Positive                 | 3                | Acosta-Martínez and Tabatai, 2000;                                       |

|                                   |                       |          |    |                                                                                                                                                                                                                                                                                                                                                                                                               |
|-----------------------------------|-----------------------|----------|----|---------------------------------------------------------------------------------------------------------------------------------------------------------------------------------------------------------------------------------------------------------------------------------------------------------------------------------------------------------------------------------------------------------------|
|                                   |                       | Negative | 1  | Firmano et al., 2021;<br>Lalande et al., 2009;<br>Makoi et al., 2010                                                                                                                                                                                                                                                                                                                                          |
| Inorganic fertilizer<br>(general) | ACP <sup>1</sup>      | Positive | 13 | Ajwaa et al., 1999;<br>Bardgett and Leemans, 1995;<br>Bi et al., 2018;<br>Bi et al., 2020;<br>Choudhary et al., 2021;<br>de Castro Lopes et al., 2013;<br>Futa et al., 2021;<br>Gaind and Singh, 2016;<br>Damian et al., 2021;<br>Ning et al., 2017;<br>Prasanthi et al., 2019;<br>Rezaei-Chiyaneh et al., 2021;<br>Verdenelli et al., 2013;                                                                  |
|                                   |                       | Negative | 1  | Aparnad et al., 2016;                                                                                                                                                                                                                                                                                                                                                                                         |
|                                   | ALP <sup>1</sup>      | Positive | 16 | Ajwaa et al., 1999;<br>Aparna et al., 2016;<br>Bi et al., 2018;<br>Bi et al., 2020<br>Biswas et al., 2021;<br>Choudhary et al., 2021;<br>Dhull et al., 2004;<br>Futa et al., 2021;<br>Goyal et al., 1999;<br>Jain et al., 2018;<br>Joshi et al., 2021;<br>Kumar et al., 2021b;<br>Liu et al., 2010;<br>Manna et al., 2005;<br>Prasanthi et al., 2019;<br>Rezaei-Chiyaneh et al., 2021;<br>Wang et al., 2022a; |
|                                   |                       | Negative | 1  |                                                                                                                                                                                                                                                                                                                                                                                                               |
|                                   | ACP, ALP <sup>2</sup> | Positive | 1  | Miao et al., 2019;                                                                                                                                                                                                                                                                                                                                                                                            |
| Inorganic nitrogen                | ACP <sup>1</sup>      | Positive | 8  | Bardgett and Leemans, 1995;<br>Dick et al., 1988;<br>Guan et al., 2011;<br>Johnson et al., 1998;<br>Kohler et al., 2007;<br>Menge and Field, 2007;<br>Sarma and Gogoi, 2017;<br>Siwik-Ziomek et al., 2014;                                                                                                                                                                                                    |
|                                   |                       | Negative | 8  | Arruda et al., 2018;                                                                                                                                                                                                                                                                                                                                                                                          |

|                      |                       |          |    |                                                                                                                                                                                                             |
|----------------------|-----------------------|----------|----|-------------------------------------------------------------------------------------------------------------------------------------------------------------------------------------------------------------|
|                      |                       |          |    | Chen et al., 2021a;<br>Koper and Lemanowicz, 2008;<br>Mullen et al., 1998;<br>Rakshit et al., 2016;<br>Siwik-Ziomek et al., 2014;<br>Sun et al., 2020;<br>Wang et al., 2021c;                               |
|                      | ACP <sup>2</sup>      | Positive | 1  | Jian et al., 2016;                                                                                                                                                                                          |
|                      | ALP <sup>1</sup>      | Positive | 2  | Liu et al., 2017;<br>Siwik-Ziomek et al., 2014;                                                                                                                                                             |
|                      |                       | Negative | 4  | Manna et al., 2005;<br>Moreno-Cornejo et al., 2017;<br>Rakshit et al., 2016;<br>Siwik-Ziomek et al., 2014;                                                                                                  |
|                      | ACP, ALP <sup>2</sup> | Positive | 2  | Margalef et al., 2021;<br>Marklein and Houlton, 2012;                                                                                                                                                       |
| Inorganic phosphorus | ACP <sup>1</sup>      | Negative | 8  | de Castro Lopes et al., 2013;<br>Gispert et al., 2013;<br>Khandare et al., 2020;<br>Li et al., 2021a;<br>Liang and Elsgaard, 2021;<br>Lo Presti et al., 2021;<br>Silva et al., 2015;<br>Wang et al., 2021c; |
|                      |                       | None     | 3  | Guan et al., 2013;<br>Radersma and Grierson, 2004;<br>Randall et al., 2020;                                                                                                                                 |
|                      | ALP <sup>1</sup>      | Negative | 2  | Khandare et al., 2020;<br>Svensson et al., 2001;                                                                                                                                                            |
|                      |                       | None     | 4  | Emami et al., 2022;<br>Shi et al., 2012;<br>Shi et al., 2020;<br>Trabelsi et al., 2017;                                                                                                                     |
|                      | ACP, ALP <sup>2</sup> | Negative | 2  | Margalef et al., 2021;<br>Marklein and Houlton, 2012;                                                                                                                                                       |
|                      |                       | None     | 1  | Janes-Bassett et al., 2022;                                                                                                                                                                                 |
|                      |                       |          |    |                                                                                                                                                                                                             |
| Organic fertilizers  | ACP <sup>1</sup>      | Positive | 39 | Atoloye et al., 2021;<br>Banik et al., 2006;<br>Basak et al., 2017;<br>Bobul'ská et al., 2015;<br>Caballero Vanegas et al., 2018;<br>Carricondo-Martínez et al., 2022;                                      |

Chang et al., 2007;  
 Chatterjee et al., 2021;  
 Chen et al., 2003;  
 Chen et al., 2021a;  
 Cicatelli et al., 2014;  
 Dutta et al., 2020;  
 Efthimiadou et al., 2010;  
 Eichler-Löbermann et al., 2021;  
 Gaiind and Singh, 2015a;  
 García-Ruiz et al., 2008;  
 García-Ruiz et al., 2012;  
 Guan et al., 2011;  
 Haynes and Williams, 1999;  
 Jiang et al., 2019;  
 Lalande et al., 2003;  
 Martínez et al., 2018;  
 Moharana et al., 2022;  
 Monokrousos et al., 2006;  
 Moreno et al., 1998;  
 Pajares et al., 2009;  
 Pramanik et al., 2017;  
 Prasanthi et al., 2019;  
 Radhakrishnan et al., 2022;  
 Rao et al., 1997;  
 Ros et al., 2007;  
 Sarkar et al., 2020;  
 Sharma et al., 2013b;  
 Simanca Fontalvo and Cuervo Andrade, 2018;  
 Singh et al., 2015;  
 Singh et al., 2020;  
 Sudhakaran et al., 2019;  
 Tejada et al., 2006;  
 Tuti et al., 2020;

ALP<sup>1</sup>

Positive

43

Adeleke et al., 2021;  
 Aher et al., 2019;  
 Akmal et al., 2019b;  
 Atoloye et al., 2021;  
 Basak et al., 2017;  
 Blaise and Rao, 2004;  
 Bobul'ská et al., 2015;  
 Brennan and Acosta-Martinez, 2019;  
 Caballero Vanegas et al., 2018;

|        |                       |          |    |                                                                                                                                                                                                                                                                                                                                                                                                                                                                                                                                                                                                                                                                                                                                                                                                                                                                                                                                                                                     |
|--------|-----------------------|----------|----|-------------------------------------------------------------------------------------------------------------------------------------------------------------------------------------------------------------------------------------------------------------------------------------------------------------------------------------------------------------------------------------------------------------------------------------------------------------------------------------------------------------------------------------------------------------------------------------------------------------------------------------------------------------------------------------------------------------------------------------------------------------------------------------------------------------------------------------------------------------------------------------------------------------------------------------------------------------------------------------|
|        |                       |          |    | <p>Chang et al., 2007;<br/> Chatterjee et al., 2021;<br/> Dhull et al., 2004;<br/> Durrer et al., 2021;<br/> Dutta et al., 2020;<br/> Efthimiadou et al., 2010;<br/> Eichler-Löbermann et al., 2021;<br/> Fereidooni et al., 2013;<br/> Gaind and Singh, 2016;<br/> García-Ruiz et al., 2008;<br/> Gigliotti et al., 2001;<br/> Krey et al., 2011;<br/> Kumar et al., 2021a;<br/> Meena et al., 2016;<br/> Melero et al., 2006;<br/> Melero et al., 2007a;<br/> Melero Sanchez et al., 2008;<br/> Melero et al., 2008a;<br/> Melero et al., 2008b;<br/> Moharana et al., 2022;<br/> Monokrousos et al., 2006;<br/> Okur et al., 2006;<br/> Pandey and Pandey, 2009<br/> Prasanthi et al., 2019;<br/> Ram et al., 2019;<br/> Ramanandan et al., 2020;<br/> Rao et al., 1997;<br/> Sharma et al., 2013b;<br/> Singh et al., 2020;<br/> Sudhakaran et al., 2019;<br/> Tavali et al., 2021;<br/> Tejada and Gonzalez, 2007;<br/> Tejada and González, 2009;<br/> Truu et al., 2008;</p> |
|        | ACP, ALP <sup>2</sup> | Positive | 1  | Miao et al., 2019;                                                                                                                                                                                                                                                                                                                                                                                                                                                                                                                                                                                                                                                                                                                                                                                                                                                                                                                                                                  |
| Manure | ACP <sup>1</sup>      | Positive | 22 | <p>Acosta-Martinez et al., 2011b;<br/> Ali et al., 2019;<br/> Antonious C.F., 2009;<br/> Balota et al., 2014;<br/> Bhambure et al., 2018;<br/> Chakrabarti et al., 2000;<br/> Diallo-Diagne et al., 2016;<br/> Dick et al., 1988;<br/> Dinesh et al., 2012;</p>                                                                                                                                                                                                                                                                                                                                                                                                                                                                                                                                                                                                                                                                                                                     |

|                             |                  |          |    |                                                                                                                                                                                                                                                                                                                                                                                                                                                                                                                                                                                                                                                                                                                       |
|-----------------------------|------------------|----------|----|-----------------------------------------------------------------------------------------------------------------------------------------------------------------------------------------------------------------------------------------------------------------------------------------------------------------------------------------------------------------------------------------------------------------------------------------------------------------------------------------------------------------------------------------------------------------------------------------------------------------------------------------------------------------------------------------------------------------------|
|                             |                  |          |    | Dora et al., 2006;<br>Gopinath et al., 2009;<br>Hazarika et al., 2021;<br>Kobierski et al., 2017;<br>Kuziemska et al., 2020;<br>Li et al., 2012;<br>Mahajan et al., 2021;<br>Mani et al., 2020;<br>Martyniuk et al., 2019;<br>Romanya et al., 2017;<br>Saha et al., 2008a;<br>Tiecher et al., 2017;<br>Xu et al., 2019;                                                                                                                                                                                                                                                                                                                                                                                               |
|                             | ALP <sup>1</sup> | Positive | 29 | Antionious C.F., 2009;<br>Böhme et al., 2005;<br>Chaudhary et al., 2015;<br>Delgado et al., 2012;<br>Dick et al., 1988;<br>Dora et al., 2006;<br>Fereidooni et al., 2013;<br>Fraser et al., 2015;<br>Gaind and Nain, 2010;<br>Garg and Bahl, 2008;<br>Gopinath et al., 2009;<br>Hojati and Nourbakhsh, 2006;<br>Kobierski et al., 2017;<br>Kumar et al., 2021b;<br>Langer and Klimanek, 2006;<br>Li et al., 2012;<br>Liu and Zhou, 2017;<br>Liu et al., 2010;<br>Mani et al., 2020;<br>Manna et al., 2007;<br>Pandey et al., 2008;<br>Qin et al., 2020;<br>Ramesh et al., 2009;<br>Saha et al., 2008a;<br>Saha et al., 2008b;<br>Shi et al., 2019b;<br>Wang et al., 2012;<br>Yang et al., 2018;<br>Zhao et al., 2009; |
| Manure + mineral fertilizer | ACP <sup>1</sup> | Positive | 26 | Alguacil et al., 2003;<br>Ali et al., 2019;                                                                                                                                                                                                                                                                                                                                                                                                                                                                                                                                                                                                                                                                           |

Bera et al., 2016;  
 Bhatt et al., 2016;  
 Billah et al., 2020;  
 Biswas et al., 2018;  
 Cao et al., 2022;  
 Choudhary et al., 2021;  
 Damian et al., 2021;  
 Dinesh et al., 2012;  
 Elbl et al., 2019;  
 Gagnon et al., 1999;  
 Hatti et al., 2018;  
 Jiang et al., 2019;  
 Laxminarayana K., 2017;  
 Masto et al., 2006;  
 Meshram et al., 2016;  
 Moro et al., 2021;  
 Omenda et al., 2019;  
 Qaswar et al., 2020;  
 Roohi et al., 2020;  
 Saha et al., 2019;  
 Shao et al., 2014;  
 Singh et al., 2015;  
 Singh et al., 2018b;  
 Wei et al., 2017;

ALP<sup>1</sup>

Positive

26

Akmal et al., 2019a;  
 Bera et al., 2016;  
 Bhatt et al., 2016;  
 Biswas et al., 2018;  
 Cao et al., 2022;  
 Choudhary et al., 2021;  
 Colvan et al., 2001;  
 Gagnon et al., 1999;  
 Goyal et al., 1999;  
 Guo et al., 2021;  
 Jia et al., 2018;  
 Kaur et al., 2017;  
 Laxminarayana K., 2017;  
 Mandal et al., 2007;  
 Manna et al., 2007;  
 Masto et al., 2006;  
 Meshram et al., 2016;  
 Roohi et al., 2020;  
 Saha et al., 2019;  
 Sharma et al., 2015;  
 Singh et al., 2020;

|                                                     |                       |          |    |                                                                                                                                                                                                                                                                                                 |
|-----------------------------------------------------|-----------------------|----------|----|-------------------------------------------------------------------------------------------------------------------------------------------------------------------------------------------------------------------------------------------------------------------------------------------------|
|                                                     |                       |          |    | Singh et al., 2018b;<br>Wei et al., 2017;<br>Wyszkowska and<br>Wyszkowski, 2010;<br>Xu et al., 2018;<br>Zhao et al., 2009;                                                                                                                                                                      |
|                                                     | ACP, ALP <sup>2</sup> | Positive | 1  | Miao et al., 2019;                                                                                                                                                                                                                                                                              |
| Organic<br>phosphorus                               | ACP <sup>1</sup>      | Positive | 1  | Guan et al., 2013;                                                                                                                                                                                                                                                                              |
|                                                     | ALP <sup>1</sup>      | Positive | 3  | Durrer et al., 2021;<br>Shi et al., 2021;<br>Verma et al., 2021;                                                                                                                                                                                                                                |
| Vermicompost                                        | ACP <sup>1</sup>      | Positive | 7  | Aechra et al., 2021;<br>Das et al., 2021;<br>Hazarika et al., 2021;<br>Ruiz and Salas, 2019;<br>Saha et al., 2008a;<br>Tejada and Benítez, 2011;<br>Zhang et al., 2020;                                                                                                                         |
|                                                     | ALP <sup>1</sup>      | Positive | 6  | Becagli et al., 2022;<br>Das et al., 2021;<br>Dubey et al., 2020;<br>Nisha et al., 2019;<br>Tejada and González, 2009;<br>Zhang et al., 2020;                                                                                                                                                   |
| Biostimulant/bioferti<br>lizer<br>(±microorganisms) | ACP <sup>1</sup>      | Positive | 11 | Aechra et al., 2021;<br><br>Bana et al., 2022a;<br><br>Bana et al., 2022b;<br>Dubey et al., 2021;<br>Firmano et al., 2021;<br>Fitriatin et al., 2021;<br>García-Martínez et al., 2010;<br>Khandare et al., 2020;<br>Kowalska et al., 2017;<br>Sadeghi and Taban, 2021;<br>Sharma et al., 2013a; |
|                                                     | ALP <sup>1</sup>      | Positive | 11 | Bana et al., 2022a;<br>Bana et al., 2022b;<br>Chaudhary et al., 2021;<br>Chaudhary et al., 2022;<br>Dubey et al., 2021;<br>Firmano et al., 2021;<br>Guo et al., 2021;<br>Kaur et al., 2017;                                                                                                     |



|                              |                  |          |    |                                                                                                                                                                                                                                                                                                                                                                    |
|------------------------------|------------------|----------|----|--------------------------------------------------------------------------------------------------------------------------------------------------------------------------------------------------------------------------------------------------------------------------------------------------------------------------------------------------------------------|
|                              |                  |          |    | Khandare et al., 2020;<br>Kowalska et al., 2017;<br>Niewiadomska et al., 2020a;                                                                                                                                                                                                                                                                                    |
| Biowaste fertilizer          | ACP <sup>1</sup> | Positive | 5  | El-Bassi et al., 2021;<br>Krey et al., 2011;<br>Rajashekhara and<br>Siddaramappa, 2008;<br>Romero et al., 2005;<br>Tejada et al., 2006;                                                                                                                                                                                                                            |
|                              | ALP <sup>1</sup> | Positive | 6  | Emmerling et al., 2010;<br>Hashimoto et al., 2009<br>Mbarki et al., 2010;<br>Meli et al., 2007;<br>Piotrowska et al., 2006;<br>Tejada et al., 2007;                                                                                                                                                                                                                |
| Sludge                       | ACP <sup>1</sup> | Positive | 6  | Bhattacharyya et al., 2001;<br>Gagnon et al., 1999;<br>Gagnon et al., 2003;<br>Moreira et al., 2017;<br>Pascual et al., 2007<br>Siebielec et al., 2018;                                                                                                                                                                                                            |
|                              |                  | None     | 1  | Alvarenga et al., 2008                                                                                                                                                                                                                                                                                                                                             |
|                              | ALP <sup>1</sup> | Positive | 15 | Carbonell et al., 2009;<br>Dhanker et al., 2020;<br>Dhanker et al., 2021;<br>Frąc M., 2011;<br>Ghosh et al., 2019;<br>Lakhdar et al., 2011;<br>Liu et al., 2020;<br>Meena et al., 2016;<br>Meena et al., 2018;<br>N'Dayegamiye et al., 2006;<br>Pascual et al., 2007;<br>Roy et al., 2019;<br>Siebielec et al., 2018;<br>Tavali et al., 2021;<br>Xie et al., 2011; |
| Green manure                 | ACP <sup>1</sup> | Positive | 2  | Pérez Brandan et al., 2017;<br>Zhaolei et al., 2017;                                                                                                                                                                                                                                                                                                               |
|                              | ALP <sup>1</sup> | Positive | 1  | Janaki et al., 2021;                                                                                                                                                                                                                                                                                                                                               |
| Green manure +<br>fertilizer | ACP <sup>1</sup> | Positive | 1  | Bolton et al., 1985;                                                                                                                                                                                                                                                                                                                                               |
|                              |                  | None     | 3  | Elfstrand et al., 2007a;<br>Elfstrand et al., 2007b;<br>Onkum and Teamkao, 2020;                                                                                                                                                                                                                                                                                   |

|                         |                  |          |    |                                                                                                                                                                                                                                                                                                                                                                                                                                                                                                                                                    |
|-------------------------|------------------|----------|----|----------------------------------------------------------------------------------------------------------------------------------------------------------------------------------------------------------------------------------------------------------------------------------------------------------------------------------------------------------------------------------------------------------------------------------------------------------------------------------------------------------------------------------------------------|
|                         | ALP <sup>1</sup> | Positive | 1  | Dhull et al., 2004;                                                                                                                                                                                                                                                                                                                                                                                                                                                                                                                                |
| Crop residue management | ACP <sup>1</sup> | Positive | 8  | Chatterjee et al., 2021;<br>Nath et al., 2017;<br>Nath et al., 2021;<br>Qaswar et al., 2020;<br>Sepat et al., 2014;<br>Sharma et al., 2019a;<br>Singh et al., 2018;<br>Yang et al., 2019;                                                                                                                                                                                                                                                                                                                                                          |
|                         |                  | Negative | 1  | Peruccci et al., 1985;                                                                                                                                                                                                                                                                                                                                                                                                                                                                                                                             |
|                         | ALP <sup>1</sup> | Positive | 22 | Chatterjee et al., 2021;<br>Choudhary et al., 2018a;<br>Gaiind and Nain, 2007;<br>Galvez et al., 2012;<br>Hai-Ming et al., 2014;<br>Hazra et al., 2021;<br>Jat et al., 2020;<br>Khan et al., 2022;<br>Melero et al., 2006;<br>Melero et al., 2009;<br>Moreno-Cornejo et al., 2017;<br>Nath et al., 2021;<br>Peruccci et al., 1985;<br>Pooniya et al., 2022;<br>Sepat et al., 2014;<br>Sharma et al., 2019a;<br>Singh et al., 2018;<br>Tao et al., 2009;<br>Tejada et al., 2009;<br>Ullah et al., 2020;<br>Wei et al., 2014a;<br>Yang et al., 2019; |
| Straw residues          | ACP <sup>1</sup> | Positive | 3  | Arun et al., 2020;<br>Cao et al., 2022;<br>Wei et al., 2021;                                                                                                                                                                                                                                                                                                                                                                                                                                                                                       |
|                         | ALP <sup>1</sup> | Positive | 7  | Arun et al., 2020;<br>Cao et al., 2022;<br>Cui et al., 2022;<br>Singh and Sharma, 2020;<br>Singh et al., 2022;<br>Ullah et al., 2018a;<br>Zhang et al., 2016a;                                                                                                                                                                                                                                                                                                                                                                                     |
| Mulching                | ACP <sup>1</sup> | Positive | 5  | Arun et al., 2020;<br>Balota et al., 2004;                                                                                                                                                                                                                                                                                                                                                                                                                                                                                                         |

|                                 |                  |          |    |                                                                                                                                                                                                                                                                                                                                |
|---------------------------------|------------------|----------|----|--------------------------------------------------------------------------------------------------------------------------------------------------------------------------------------------------------------------------------------------------------------------------------------------------------------------------------|
|                                 | ALP <sup>1</sup> | None     | 1  | Benítez et al., 2000;<br>da Silva Xavier et al., 2020;<br>Zhu et al., 2022;<br>Jain et al., 2018;                                                                                                                                                                                                                              |
|                                 |                  | Positive | 5  | Arun et al., 2020;<br>Balota et al., 2004;<br>Buck et al., 2000;<br>Rao et al., 1997;<br>Wang et al., 2014a;<br>Jain et al., 2018;                                                                                                                                                                                             |
|                                 |                  | None     | 1  |                                                                                                                                                                                                                                                                                                                                |
|                                 |                  | Positive | 7  | Akmal et al., 2019a;<br>Akmal et al., 2019b;<br>Egamberdieva et al., 2019;<br>El-Bassi et al., 2021;<br>Noronha et al., 2022;<br>Salam et al., 2019;<br>Wojewódzki et al., 2022;<br>Yuan et al., 2022;                                                                                                                         |
| Biochar                         | ACP <sup>1</sup> | Negative | 1  |                                                                                                                                                                                                                                                                                                                                |
|                                 |                  | Positive | 14 | Ali et al., 2017;<br>Azeem et al., 2021;<br>Becagli et al., 2022;<br>Becagli et al., 2022;<br>Du et al., 2014;<br>Dubey et al., 2020;<br>Guo et al., 2021;<br>Jabborova et al., 2021;<br>Khan et al., 2022;<br>Masto et al., 2013;<br>Saha et al., 2019;<br>Wojewódzki et al., 2022;<br>Yao et al., 2021;<br>Zhu et al., 2017; |
|                                 | ALP <sup>2</sup> | Positive | 1  | Pokharel et al., 2020;                                                                                                                                                                                                                                                                                                         |
| Burning                         | ACP <sup>1</sup> | Negative | 3  | Dick et al., 1988;<br>Hoyle and Murphy, 2006;<br>Trujillo-Narcía et al., 2019;                                                                                                                                                                                                                                                 |
|                                 | ALP <sup>1</sup> | Negative | 3  | Ajwaa et al., 1999;<br>Peruccci et al., 1984;<br>Perucci et al., 2007;                                                                                                                                                                                                                                                         |
| Phosphate solubilizing bacteria | ACP <sup>1</sup> | Positive | 7  | Aechra et al., 2021;<br><br>Chatterjee et al., 2021;<br>Khandare et al., 2020;<br>Khuong et al., 2018;<br>Krey et al., 2011;                                                                                                                                                                                                   |

|                                 |                  |          |    |                                                                                                                                                                                                                                                                                                                                                                                                       |
|---------------------------------|------------------|----------|----|-------------------------------------------------------------------------------------------------------------------------------------------------------------------------------------------------------------------------------------------------------------------------------------------------------------------------------------------------------------------------------------------------------|
|                                 |                  |          |    | Liu et al., 2021b;<br>Pareek et al., 2019;                                                                                                                                                                                                                                                                                                                                                            |
|                                 | ALP <sup>1</sup> | Positive | 9  | Basak et al., 2017;<br>Biswas et al., 2021;<br>Chatterjee et al., 2021;<br>Chaudhary et al., 2022;<br>Gaiind and Nain, 2007;<br>Khandare et al., 2020;<br>Krey et al., 2011;<br>Naragund et al., 2020;<br>Pareek et al., 2019;                                                                                                                                                                        |
| Plant beneficial<br>bacteria    | ACP <sup>1</sup> | Positive | 11 | Benbrik et al., 2021;<br><br>Bhambure et al., 2018;<br>Billah et al., 2020;<br>de Cássia et al., 2018;<br>Gospodarek et al., 2021;<br>Idris and Yuliar, 2021;<br>Rajeela et al., 2017;<br>Madhaiyan et al., 2009<br>Mercl et al., 2020;<br>Rouydel et al., 2021;<br>Verma et al., 2016b;                                                                                                              |
|                                 |                  | Negative | 2  | de Barros et al., 2019;<br>Makoi et al., 2010                                                                                                                                                                                                                                                                                                                                                         |
|                                 |                  | None     | 1  | Ruiz and Salas, 2019;                                                                                                                                                                                                                                                                                                                                                                                 |
|                                 | ALP <sup>1</sup> | Positive | 16 | Ali et al., 2017;<br>Benbrik et al., 2021;<br>Chaudhary et al., 2021;<br>Cui et al., 2015;<br>de Cássia et al., 2018;<br>Dubey et al., 2021;<br>Emami et al., 2022;<br>Idris and Yuliar, 2021;<br>Kohler et al., 2007;<br>Manjunath et al., 2016;<br>Nakas et al., 1987;<br>Omara et al., 2017;<br>Rouydel et al., 2021;<br>Schoebitz et al., 2019;<br>Valarini et al., 2003;<br>Verma et al., 2016b; |
|                                 |                  | Negative | 2  | Makoi et al., 2010;<br>Mercl et al., 2020;                                                                                                                                                                                                                                                                                                                                                            |
| Arbuscular<br>mycorrhizal fungi | ACP <sup>1</sup> | Positive | 17 | de Barros et al., 2019;                                                                                                                                                                                                                                                                                                                                                                               |

|                  |          |      |   |                                                                                                                                                                                                                                                                                                                                                                                                                                                             |
|------------------|----------|------|---|-------------------------------------------------------------------------------------------------------------------------------------------------------------------------------------------------------------------------------------------------------------------------------------------------------------------------------------------------------------------------------------------------------------------------------------------------------------|
|                  |          |      |   | Ferreira-Vilela et al., 2014;<br>Hu et al., 2019b;<br>Hu et al., 2019a;<br>Kim et al., 2002;<br>Laxminarayana K., 2017;<br>Manjunath et al., 2016;<br>Nakas et al., 1987;<br>Sales et al., 2021;<br>Sharma et al., 2013a;<br>Tarafdar and Rao, 1996;<br>Tarafdar and Gharu, 2006;<br>Turan V., 2021;<br>Wang et al., 2013c;<br>Yadav et al., 2007;<br>Yin et al., 2021;<br>Zhang et al., 2019b;<br>Wakelin et al., 2007;<br>Izaguirre-Mayoral et al., 2000; |
|                  |          | None | 2 |                                                                                                                                                                                                                                                                                                                                                                                                                                                             |
| ALP <sup>1</sup> | Positive |      | 8 | Chatterjee et al., 2021;<br>de Barros et al., 2019;<br>Gaiind and Nain, 2007;<br>Kohler et al., 2008;<br>Laxminarayana K., 2017;<br>Tarafdar and Rao, 1996;<br>Tarafdar and Gharu, 2006;<br>Yadav et al., 2007;                                                                                                                                                                                                                                             |
| ALP <sup>1</sup> | None     |      | 1 | Wakelin et al., 2007;                                                                                                                                                                                                                                                                                                                                                                                                                                       |

*Table S15. Single studies and reviews of APase response relationships to weed and pest management practices.*

| Management practice        | APase (single study <sup>1</sup> or review <sup>2</sup> ) | Response relationship | Vote counting | Study                                                                                                                       |
|----------------------------|-----------------------------------------------------------|-----------------------|---------------|-----------------------------------------------------------------------------------------------------------------------------|
| Manual weeding vs chemical | ACP <sup>1</sup>                                          | Positive              | 3             | Bhatt et al., 2016;<br>Majumdar et al., 2010;<br>Nedunchezhiyan et al., 2018;                                               |
|                            | ALP <sup>1</sup>                                          | Positive              | 5             | Bhatt et al., 2016;<br>Majumdar et al., 2010<br>Nedunchezhiyan et al., 2018;<br>Ullah et al., 2018b;<br>Ullah et al., 2020; |
| Herbicides                 | ACP <sup>1</sup>                                          | Negative              | 4             | Carter et al., 2007;<br>Cycoń et al., 2013;                                                                                 |

|              |                       |                    |   |                                                                                                                                                                                                                                                                                                                     |
|--------------|-----------------------|--------------------|---|---------------------------------------------------------------------------------------------------------------------------------------------------------------------------------------------------------------------------------------------------------------------------------------------------------------------|
|              |                       | None               | 6 | Savin et al., 2009;<br>Wyszkowska J., 2002;<br>Arya et al., 2018;<br>Majumdar et al., 2010<br>Meher et al., 2021;<br>Pozo et al., 1994;<br>Sofo et al., 2012;<br>Tomkiel et al., 2018;                                                                                                                              |
|              | ALP <sup>1</sup>      | Negative           | 7 | Cycoń et al., 2013;<br>Rasool et al., 2014;<br>Saha et al., 2016;<br>Savin et al., 2009;<br>Singh and Gohshal, 2013;<br>Sofo et al., 2012;<br>Wyszkowska J., 2002;<br>Majumdar et al., 2010;<br>Meher et al., 2021;<br>Nivelle et al., 2018;<br>Pozo et al., 1994;<br>Tejada et al., 2017;<br>Tomkiel et al., 2018; |
|              |                       | None               | 6 |                                                                                                                                                                                                                                                                                                                     |
|              | ACP, ALP <sup>2</sup> | None               | 1 | Riah et al., 2014;                                                                                                                                                                                                                                                                                                  |
| Fungicides   | ACP <sup>1</sup>      | Negative           | 2 | Chen et al., 2001;<br>Wang et al., 2022c;                                                                                                                                                                                                                                                                           |
|              |                       | None               | 3 | Ntalli et al., 2019b;<br>Pozo et al., 1995;<br>Singh N., 2005;                                                                                                                                                                                                                                                      |
|              | ACP <sup>2</sup>      | Positive           |   | Riah et al., 2014;                                                                                                                                                                                                                                                                                                  |
|              | ALP <sup>1</sup>      | Negative           | 1 | Ntalli et al., 2019a;                                                                                                                                                                                                                                                                                               |
|              |                       | None               | 3 | Baćmaga et al., 2019;<br>Pozo et al., 1995;<br>Wang et al., 2022c;                                                                                                                                                                                                                                                  |
|              | ALP <sup>2</sup>      | Negative           |   | Riah et al., 2014;                                                                                                                                                                                                                                                                                                  |
| Insecticides | ACP <sup>1</sup>      | Negative           | 4 | Dinesh et al., 1995;<br>García-Martínez et al., 2010;<br>Megharaj et al., 1999;<br>Tu C.M., 1995;                                                                                                                                                                                                                   |
|              |                       | None               | 3 | Megharaj et al., 1999;<br>Racke et al., 1996;<br>Tu C.M., 1995;                                                                                                                                                                                                                                                     |
|              | ACP <sup>2</sup>      | Negative           | 1 | Riah et al., 2014;                                                                                                                                                                                                                                                                                                  |
|              | ALP <sup>1</sup>      | Recovery with time | 3 | Cycoń Piotrowska-Seget, 2015;<br>Mahapatra et al., 2017;<br>Pandey et al., 2006;                                                                                                                                                                                                                                    |
|              |                       |                    |   |                                                                                                                                                                                                                                                                                                                     |

|                  |                    |   |                     |
|------------------|--------------------|---|---------------------|
|                  | None               | 1 | Racke et al., 1996; |
| ALP <sup>2</sup> | Recovery with time | 1 | Riah et al., 2014;  |

*Table S16. Single and meta-analysis studies of APase response relationships to irrigation practice.*

| <b>Irrigation practice</b> | <b>APase<br/>(single<sup>1</sup> or<br/>meta-analysis<sup>2</sup><br/>study)</b> | <b>Response<br/>relationship</b> | <b>Vote<br/>counting</b> | <b>Study</b>                                                                                                                                                                                                                                    |
|----------------------------|----------------------------------------------------------------------------------|----------------------------------|--------------------------|-------------------------------------------------------------------------------------------------------------------------------------------------------------------------------------------------------------------------------------------------|
| Optimal irrigation         | ACP <sup>1</sup>                                                                 | Positive                         | 10                       | D'Ascoli et al., 2006;<br>George et al., 2013;<br>He et al., 2010;<br>Li et al., 2017a;<br>Pascual et al., 2007;<br>Sharma et al., 2013b;<br>Wang et al., 2013c;<br>Zhang et al., 2019a;<br>Zhang et al., 2021;<br>Zhong et al., 2007;          |
|                            | ACP <sup>2</sup>                                                                 | Positive                         | 1                        | Sun et al., 2020;                                                                                                                                                                                                                               |
|                            | ALP <sup>1</sup>                                                                 | Positive                         | 10                       | Abdalla and Lager, 2009;<br>George et al., 2013;<br>He et al., 2010;<br>Jia et al., 2018;<br>Kumar et al., 2021b;<br>Li et al., 2018c;<br>Pascual et al., 2007;<br>Romero-Trigueros et al., 2021;<br>Sharma et al., 2013b;<br>Tan et al., 2009; |
| Waste water<br>irrigation  | ACP <sup>1</sup>                                                                 | Positive                         | 1                        | Meli et al., 2002;                                                                                                                                                                                                                              |
|                            |                                                                                  | Negative                         | 1                        | Masto et al., 2008                                                                                                                                                                                                                              |
|                            |                                                                                  | None                             | 1                        | Santos et al., 2016;                                                                                                                                                                                                                            |
|                            | ALP <sup>1</sup>                                                                 | Positive                         | 4                        | Bhattachayya et al., 2008;<br>García-Orenes et al., 2015;<br>Lal et al., 2015;<br>Meli et al., 2002;                                                                                                                                            |
|                            |                                                                                  | Negative                         | 1                        | Masto et al., 2008                                                                                                                                                                                                                              |
|                            |                                                                                  | None                             | 3                        | Adrover et al., 2007;<br>Adrover et al., 2017;<br>Kayikcioglu H.H., 2018;                                                                                                                                                                       |

*Table S17. Single studies of APase response relationships to livestock, grazing and mowing management.*

| Management type | APase | Response relationship | Vote counting | Study                                                                                                                      |
|-----------------|-------|-----------------------|---------------|----------------------------------------------------------------------------------------------------------------------------|
| Crop-livestock  | ACP   | Positive              | 5             | de Jesus Franco et al., 2020; Izquierdo et al., 2003; Damian et al., 2021; Martins Sousa et al., 2020; Silva et al., 2015; |
| Grazing         | ACP   | Positive              | 4             | Bardgett and Leemans, 1995; George et al., 2013; Ramos et al., 2011; Ramos et al., 2010;                                   |
|                 | ALP   | Positive              | 2             | Galindo et al., 2020; George et al., 2013;                                                                                 |
| Mowing          | ALP   | Negative              | 1             | Zibilske and Makus, 2009;                                                                                                  |

*Table S18. Single and meta-analysis studies of APase response relationships to soil pollutant content.*

| Pollutant    | APase<br>(single <sup>1</sup> or<br>meta-<br>analysis <sup>2</sup><br>study) | Response<br>relationship | Vote<br>counting | Study                                                                                                                                           |
|--------------|------------------------------------------------------------------------------|--------------------------|------------------|-------------------------------------------------------------------------------------------------------------------------------------------------|
| Heavy metals |                                                                              |                          |                  |                                                                                                                                                 |
| Lead         | ACP <sup>1</sup>                                                             | Negative                 | 5                | Bartkowiak et al., 2021;<br>Chowdhury and Rasid, 2021b;<br>Lemanowicz et al., 2016;<br>Li et al., 2009;<br>Papa et al., 2009                    |
|              | ALP <sup>1</sup>                                                             | Negative                 | 5                | Bartkowiak et al., 2021;<br>Bhattachayya et al., 2008<br>Calvarro et al., 2014;<br>de Santiago-Martín et al., 2013;<br>Lemanowicz et al., 2016; |
| Chromium     | ACP <sup>1</sup>                                                             | Negative                 | 3                | Bartkowiak et al., 2021;<br>Chowdhury and Rasid, 2021a;<br>Wyszkowska et al., 2001;                                                             |
|              | ALP <sup>1</sup>                                                             | Negative                 | 2                | Bartkowiak et al., 2021;<br>Wyszkowska et al., 2001;                                                                                            |
| Nickel       | ACP <sup>1</sup>                                                             | Negative                 | 2                | Antonious C.F., 2009;<br>Lemanowicz et al., 2016;                                                                                               |
|              | ALP <sup>1</sup>                                                             | Negative                 | 4                | Antonious C.F., 2009;<br>Lemanowicz et al., 2016;<br>Pandey and Pandey, 2009;                                                                   |



|           |                  |          |   |                                                                                                                                                                                                        |
|-----------|------------------|----------|---|--------------------------------------------------------------------------------------------------------------------------------------------------------------------------------------------------------|
| Zinc      | ACP <sup>1</sup> | Positive | 1 | Wyszkowska et al., 2005;                                                                                                                                                                               |
|           |                  | Negative | 4 | Mandal et al., 2021;<br>Chowdhury and Rasid, 2021a;<br>Lemanowicz et al., 2016;<br>Li et al., 2018d;<br>Ros et al., 2008                                                                               |
|           | ALP <sup>1</sup> | Positive | 1 | Mandal et al., 2021;                                                                                                                                                                                   |
|           |                  | Negative | 7 | Calvarro et al., 2014;<br>de Santiago-Martín et al., 2013;<br>Fernández et al., 2014;<br>Lemanowicz et al., 2016;<br>Liu et al., 2020;<br>Łukowski and Dec, 2018;<br>Pandey and Pandey, 2009;          |
| Cadmium   | ACP <sup>1</sup> | Negative | 2 | Chowdhury and Rasid, 2021b;<br>Li et al., 2009;                                                                                                                                                        |
|           | ACP <sup>2</sup> | Positive | 1 | Aponte et al., 2020;                                                                                                                                                                                   |
|           | ALP <sup>1</sup> | Positive | 1 | Ogunkunle et al., 2020;                                                                                                                                                                                |
|           |                  | Negative | 4 | Calvarro et al., 2014;<br>Dar G., 1996;<br>de Santiago-Martín et al., 2013;<br>Pandey and Pandey, 2009;                                                                                                |
| Copper    | ACP <sup>1</sup> | Positive | 1 | Belyaeva et al., 2005;                                                                                                                                                                                 |
|           |                  | Negative | 8 | Bartkowiak et al., 2021;<br>Dewey et al., 2012;<br>Fernández-Calviño et al., 2010<br>Lebrun et al., 2012;<br>Lemanowicz et al., 2016;<br>Li et al., 2009;<br>Papa et al., 2009<br>Ros et al., 2008     |
|           | ACP <sup>2</sup> | Positive | 1 | Aponte et al., 2020;                                                                                                                                                                                   |
|           | ALP <sup>1</sup> | Negative | 7 | Bartkowiak et al., 2021;<br>Bhattachayya et al., 2008<br>Calvarro et al., 2014;<br>de Santiago-Martín et al., 2013;<br>Kuziemska et al., 2020;<br>Lemanowicz et al., 2016;<br>Pandey and Pandey, 2009; |
| Manganese | ACP <sup>1</sup> | Negative | 2 | Li et al., 2009;<br>Ros et al., 2008                                                                                                                                                                   |
| Arsenic   | ACP <sup>1</sup> | Negative | 1 | Garg and Cheema, 2021;                                                                                                                                                                                 |
|           | ALP              | Negative | 1 | Garg and Cheema, 2021;                                                                                                                                                                                 |
| Mercury   | ACP <sup>2</sup> | Negative | 1 | Aponte et al., 2020;                                                                                                                                                                                   |

|                        |                  |          |   |                                                                                                                     |
|------------------------|------------------|----------|---|---------------------------------------------------------------------------------------------------------------------|
|                        | ALP <sup>1</sup> | Negative | 1 | Casucci et al., 2003;                                                                                               |
|                        | ALP <sup>2</sup> | Negative | 1 | Aponte et al., 2020;                                                                                                |
| Sewage sludge compost  | ACP <sup>1</sup> | Negative | 3 | Antolín et al., 2005;<br>Kunito et al., 2001;<br>Moreno et al., 1998;                                               |
|                        | ALP <sup>1</sup> | Negative | 5 | Dar G., 1996;<br>Fernández et al., 2014;<br>Kunito et al., 2001;<br>Stoven and Schnug, 2009;<br>Wang et al., 2021b; |
| Petroleum diesel       | ACP <sup>1</sup> | Negative | 2 | Wyszkowska et al., 2002;<br>Wyszkowska and Wyszkowski, 2010;                                                        |
|                        | ALP <sup>1</sup> | Negative | 4 | Gospodarek et al., 2021;<br>Serrano et al., 2009;<br>Wyszkowska et al., 2002;<br>Wyszkowska and Wyszkowski, 2010;   |
| Nanomaterials          |                  |          |   |                                                                                                                     |
| Carbon, copper, silver | ACP <sup>2</sup> | Negative | 1 | Lin et al., 2021;                                                                                                   |
| Iron                   | ACP <sup>2</sup> | Positive | 1 | Lin et al., 2021;                                                                                                   |

*Table S19. Single and meta-analysis studies of APase responses to the increase of different climate change variables.*

| Variable                  | APase<br>(single <sup>1</sup> or meta-analysis <sup>2</sup> study) | Response<br>relationship | Vote<br>counting | Study                                                        |
|---------------------------|--------------------------------------------------------------------|--------------------------|------------------|--------------------------------------------------------------|
| Mean annual temperature   | ACP <sup>1</sup>                                                   | Positive                 | 1                | Ghiloufi and Chaieb, 2021;                                   |
|                           |                                                                    | Negative                 | 1                | Chen et al., 2021b;                                          |
|                           | ACP <sup>2</sup>                                                   | Positive                 | 2                | Sun et al., 2020;<br>Meng et al., 2020;                      |
|                           | ALP <sup>1</sup>                                                   | Negative                 | 1                | Wang et al., 2021a;                                          |
|                           | ACP, ALP <sup>2</sup>                                              | None                     | 1                | Margalef et al., 2021;                                       |
| Mean annual precipitation | ACP <sup>1</sup>                                                   | Positive                 | 1                | Ghiloufi and Chaieb, 2021;                                   |
|                           | ACP <sup>2</sup>                                                   | Positive                 | 1                | Sun et al., 2020;                                            |
|                           | ALP <sup>1</sup>                                                   | Positive                 | 2                | Habig and Swanepoel, 2015;<br>Morugán-Coronado et al., 2019; |
| Drought                   | ACP <sup>1</sup>                                                   | Positive                 | 1                | Caballero Vanegas et al., 2018;                              |
|                           |                                                                    | Negative                 | 2                | Gunes et al., 2007                                           |

|                         |                       |          |    |                                                                                                                                                                                                                                                                                                                                                                           |
|-------------------------|-----------------------|----------|----|---------------------------------------------------------------------------------------------------------------------------------------------------------------------------------------------------------------------------------------------------------------------------------------------------------------------------------------------------------------------------|
|                         |                       |          |    | Egamberdieva et al., 2019;                                                                                                                                                                                                                                                                                                                                                |
|                         | ALP <sup>1</sup>      | Positive | 1  | Caballero Vanegas et al., 2018;                                                                                                                                                                                                                                                                                                                                           |
|                         |                       | Negative | 1  | Egamberdieva et al., 2019;                                                                                                                                                                                                                                                                                                                                                |
|                         | ACP, ALP <sup>2</sup> | Negative | 2  | Gou et al., 2020;<br>Margalef et al., 2021;                                                                                                                                                                                                                                                                                                                               |
| Soil water scarcity     | ACP <sup>1</sup>      | Negative | 1  | Ghiloufi and Chaieb, 2021;                                                                                                                                                                                                                                                                                                                                                |
|                         |                       | None     | 2  | Mazzuchelli et al., 2020;<br>Zago et al., 2018;                                                                                                                                                                                                                                                                                                                           |
|                         | ACP, ALP <sup>2</sup> | Negative | 1  | Gou et al., 2020;                                                                                                                                                                                                                                                                                                                                                         |
| Soil water availability | ACP <sup>1</sup>      | Positive | 2  | Figueira da Silva et al., 2020;<br>Izquierdo et al., 2003;                                                                                                                                                                                                                                                                                                                |
|                         | ALP <sup>1</sup>      | Positive | 2  | Fraser et al., 2015;<br>Jabborova et al., 2021;                                                                                                                                                                                                                                                                                                                           |
| Seasonal variations     |                       |          |    |                                                                                                                                                                                                                                                                                                                                                                           |
| Rainy season            | ACP <sup>1</sup>      | Positive | 14 | Arora et al., 2021;<br>Bachmann et al., 2014;<br>Bolton et al., 1985;<br>Carlos et al., 2022;<br>Dormaar and Willms, 2000;<br>Elfstrand et al., 2007b;<br>García-Ruiz et al., 2009;<br>Jaskulska et al., 2020b;<br>Koper and Lemanowicz, 2008;<br>Li et al., 2021a;<br>Mejia Guerra et al., 2018;<br>Mina et al., 2008<br>Silvestro et al., 2017;<br>Singh et al., 2012a; |
|                         | ALP <sup>1</sup>      | Positive | 11 | Angers et al., 1993;<br>Arora et al., 2021;<br>Bachmann et al., 2014;<br>Du et al., 2014;<br>Efthimiadou et al., 2010;<br>Koper and Lemanowicz, 2008;<br>Łukowski and Dec, 2018;<br>Meli et al., 2002;<br>Neha et al., 2020;<br>Okur et al., 2006;<br>Shi et al., 2020;                                                                                                   |

|                               |                       |          |   |                                                                                                       |
|-------------------------------|-----------------------|----------|---|-------------------------------------------------------------------------------------------------------|
| Dry season                    | ACP <sup>1</sup>      | Negative | 4 | Bolton et al., 1985;<br>Hoyle and Murphy, 2006;<br>McCallister et al., 2002;<br>Tiecher et al., 2012; |
| CO <sub>2</sub> fertilization | ALP <sup>1</sup>      | Positive | 1 | Dey et al., 2019;                                                                                     |
|                               | ACP, ALP <sup>2</sup> | Positive | 1 | Margalef et al., 2021;                                                                                |

*Table S20. Single studies of crop yield responses to APase activity.*

| Crop                  | APase | Response relationship | Vote counting | Study                                                                                          |
|-----------------------|-------|-----------------------|---------------|------------------------------------------------------------------------------------------------|
| Wheat                 | ACP   | Positive              | 1             | Moharana et al., 2022;                                                                         |
|                       | ALP   | Positive              | 4             | Borase et al., 2020;<br>Furtak et al., 2017;<br>Mandal et al., 2007;<br>Moharana et al., 2022; |
| Organic Wheat         | ACP   | Positive              | 1             | Dick et al., 1988;                                                                             |
|                       | ALP   | Positive              | 2             | Sharma et al., 2015;<br>Tejada and Gonzalez, 2007;                                             |
| Maize                 | ACP   | Positive              | 1             | Wei et al., 2021;                                                                              |
|                       | ALP   | Positive              | 2             | Furtak et al., 2017;<br>Zhou et al., 2022;                                                     |
| Organic winter barley | ACP   | Positive              | 1             | Antolín et al., 2005;                                                                          |
| Organic beet          | ACP   | Positive              | 1             | Roy et al., 2019;                                                                              |
|                       | ALP   | Positive              | 1             | Roy et al., 2019;                                                                              |
| Rice                  | ACP   | Positive              | 1             | Zhang et al., 2019a;                                                                           |
|                       | ALP   | Negative              | 1             | Basak et al., 2017;                                                                            |
| Organic lentil        | ALP   | Positive              | 1             | Singh et al., 2018b;                                                                           |
| Broad bean            | ACP   | Positive              | 1             | Gao et al., 2016;                                                                              |
| Organic plum          | ALP   | None                  | 1             | Chocano et al., 2016;                                                                          |
| Organic orange        | ALP   | None                  | 1             | Madejón et al., 2003;                                                                          |

## References

- Abdalla M. A., and Langer, U., 2009. Soil enzymes activities in irrigated and rain-fed vertisols of the Semi-Arid tropics of Sudan. *International Journal of Soil Science*, 5, 226-238. <http://dx.doi.org/10.3923/ijss.2009.67.79>.
- Acosta-Martínez, V., and Tabatabai, M.A., 2000. Enzyme activities in a limed agricultural soil. *Biology and Fertility of Soils* 31, 85–91. <https://doi.org/10.1007/s003740050628>.
- Acosta-Martínez, V., Zobeck, T.M., Gill, T.E., Kennedy, A.C., 2003a. Enzyme activities and microbial community structure in semiarid agricultural soils. *Biology and Fertility of Soils* 38, 216–227. <https://doi.org/10.1007/s00374-003-0626-1>.

- Acosta-Martínez, V., Klose, S., Zobeck, T.M., 2003b. Enzyme activities in semiarid soils under conservation reserve program, native rangeland, and cropland. *Journal of Plant Nutrition and Soil Science* 166, 699–707. <https://doi.org/10.1002/jpln.200321215>.
- Acosta-Martínez, V., Upchurch, D.R., Schubert, A.M., Porter, D., Wheeler, T., 2004. Early impacts of cotton and peanut cropping systems on selected soil chemical, physical, microbiological and biochemical properties. *Biology and Fertility of Soils* 40, 44–54. <https://doi.org/10.1007/s00374-004-0745-3>.
- Acosta-Martínez, V., Acosta-Mercado, D., Sotomayor-Ramírez, D., Cruz-Rodríguez, L., 2008. Microbial communities and enzymatic activities under different management in semiarid soils. *APPLIED SOIL ECOLOGY* 38, 249–260. <https://doi.org/10.1016/j.apsoil.2007.10.012>.
- Acosta-Martínez, V., Lascano, R., Calderón, F., Booker, J.D., Zobeck, T.M., Upchurch, D.R., 2011a. Dryland cropping systems influence the microbial biomass and enzyme activities in a semiarid sandy soil. *Biology and Fertility of Soils* 47, 655–667. <https://doi.org/10.1007/s00374-011-0565-1>.
- Acosta-Martínez, V., Mikha, M.M., Sistani, K.R., Stahlman, P.W., Benjamin, J.G., Vigil, M.F., Erickson, R., 2011a. Multi-location study of soil enzyme activities as affected by types and rates of manure application and tillage practices. *Agriculture (Switzerland)* 1, 4–21. <https://doi.org/10.3390/agriculture1010004>.
- Adeleke, K.A., Atoloye, I.A., Creech, J.E., Dai, X., Reeve, J.R., 2021. Nutritive and non-nutritive effects of compost on organic dryland wheat in Utah. *Agronomy Journal* 113, 3518–3531. <https://doi.org/10.1002/agj2.20698>.
- Adetunji, A.T., Ncube, B., Meyer, A.H., Olatunji, O.S., Mulidzi, R., Lewu, F.B., 2021. Soil pH, nitrogen, phosphatase and urease activities in response to cover crop species, termination stage and termination method. *Heliyon* 7, e05980. <https://doi.org/10.1016/j.heliyon.2021.e05980>.
- Adrover M., Farrús E., Moyà G., Vadell J., 2007. Chemical properties and biological activity in soils of Mallorca following twenty years of treated wastewater irrigation. *Applied Soil Ecology*, 37, 41-138. <https://doi.org/10.1016/j.jenvman.2010.08.017>.
- Adrover, M., Moyà, G., Vadell, J., 2017. Seasonal and depth variation of soil chemical and biological properties in alfalfa crops irrigated with treated wastewater and saline groundwater. *Geoderma* 286, 54–63. <https://doi.org/10.1016/j.geoderma.2016.10.024>.
- Aechra S., Meena R.H., Meena S.C., Mundra S.L., Lakhawat S.S., Mordia A., Jat G., 2021. Soil microbial dynamics and enzyme activities as influenced by biofertilizers and split application of vermicompost in rhizosphere of wheat (*Triticum aestivum* L.). *Journal of Environmental Biology* 42: 1370-1378. [10.22438/jeb/42/5/MRN-1521](https://doi.org/10.22438/jeb/42/5/MRN-1521).
- Aher, S.B., Lakaria, B.L.A.L., Singh, A.B., Kaleshananda, S., Ramana, S., Ramesh, K., Thakur, J.K., Rajput, P.S., Yashona, D.S., 2019. Effect of organic sources of nutrients on performance of soybean (*Glycine max*). *Indian Journal of Agricultural Sciences* 89, 1787–1791.
- Ahmed, W., Qaswar, M., Jing, H., Wenjun, D., Geng, S., Kailou, L., Ying, M., Ao, T., Mei, S., Chao, L., Yongmei, X., Ali, S., Normatov, Y., Mehmood, S., Khan, M.N., Huimin, Z., 2019. Tillage practices improve rice yield and soil phosphorus fractions in two

typical paddy soils. *Journal of Soils and Sediments* 20, 850–861.  
<https://doi.org/10.1007/s11368-019-02468-3>.

Ajwa, H.A., Dell, C.J., Rice, C.W., 1999. Changes in enzyme activities and microbial biomass of tallgrass prairie soil as related to burning and nitrogen fertilization. *Soil Biology and Biochemistry* 31, 769–777. [https://doi.org/10.1016/S0038-0717\(98\)00177-1](https://doi.org/10.1016/S0038-0717(98)00177-1).

Akmal, M., Gondal, T.A., Khan, K.S., Hussain, Q., Ahmad, M., Abbas, M.S., Rafa, H.U., Khosa, S.A., 2019a. Impact of biochar prepared from leaves of *Populus euphratica* on soil microbial activity and mung bean (*Vigna radiata*) growth. *Arabian Journal of Geosciences* 12. <https://doi.org/10.1007/s12517-019-4724-2>.

Akmal, M., Maqbool, Z., Khan, K.S., Hussain, Q., Ijaz, S.S., Iqbal, M., Aziz, I., Hussain, A., Abbas, M.S., Rafa, H.U., 2019b. Integrated use of biochar and compost to improve soil microbial activity, nutrient availability, and plant growth in arid soil. *Arabian Journal of Geosciences* 12. <https://doi.org/10.1007/s12517-019-4414-0>.

Al-Taweel, L.S.J., Jubouri, G.A.A.A., 2019. Effect of Agricultural Exploitation on the Activity of Alkaline Phosphatase and Its Kinetic Properties in Some Soils. *Al-Qadisiyah Journal For Agriculture Sciences (QJAS)* (P-ISSN: 2077-5822 , E-ISSN: 2617-1479) 9, 120–135. <https://doi.org/10.33794/qjas.vol9.iss1.69>.

Alguacil, M.M., Caravaca, F., Azcón, R., Pera, J., Díaz, G., Roldán, A., 2003. Improvements in soil quality and performance of mycorrhizal *Cistus albidus* L. seedlings resulting from addition of microbially treated sugar beet residue to a degraded semiarid Mediterranean soil. *Soil Use and Management* 19, 277–283. <https://doi.org/10.1079/sum2003206>.

Ali, A., Guo, D., Mahar, A., Wang, P., Ma, F., Shen, F., Li, R., Zhang, Z., 2017. Phytoextraction of toxic trace elements by *Sorghum bicolor* inoculated with *Streptomyces pactum* (Act12) in contaminated soils. *Ecotoxicology and Environmental Safety* 139, 202–209. <https://doi.org/10.1016/j.ecoenv.2017.01.036>.

Ali, W., Nadeem, M., Ashiq, W., Zaeem, M., Gilani, S.S.M., Rajabi-Khamseh, S., Pham, T.H., Kavanagh, V., Thomas, R., Cheema, M., 2019. The effects of organic and inorganic phosphorus amendments on the biochemical attributes and active microbial population of agriculture podzols following silage corn cultivation in boreal climate. *Scientific Reports* 9, 1–17. <https://doi.org/10.1038/s41598-019-53906-8>.

Alvarenga, P., Palma, P., Gonçalves, A.P., Baião, N., Fernandes, R.M., Varennes, A. de, Vallini, G., Duarte, E., Cunha-Queda, A.C., 2008. Assessment of chemical, biochemical and ecotoxicological aspects in a mine soil amended with sludge of either urban or industrial origin. *Chemosphere* 72, 1774–1781. <https://doi.org/10.1016/j.chemosphere.2008.04.042>

Alves, G.S., Bertini, S.C.B., Barbosa, B.B., Pimentel, J.P., Junior, V.A.R., Mendes, G. de O., Azevedo, L.C.B., 2021. Fungal endophytes inoculation improves soil nutrient availability, arbuscular mycorrhizal colonization and common bean growth. *Rhizosphere* 18. <https://doi.org/10.1016/j.rhisph.2021.100330>.

Alvey, S., Bagayoko, M., Neumann, G., Buerkert, A., 2001. Cereal/legume rotations affect chemical properties and biological activities in two West African soils. *Plant and Soil* 231, 45–54. <https://doi.org/10.1023/A:1010386800937>.

- Angers, D.A., Bissonnette, N., Legere, A., Samson, N., 1993. Microbial and biochemical changes induced by rotation and tillage in a soil under barley production. *Canadian Journal of Soil Science* 73, 39–50. <https://doi.org/10.4141/cjss93-004>.
- Ansari, M.A., Saha, S., Das, A., Lal, R., Das, B., Choudhury, B.U., Roy, S.S., Sharma, S.K., Singh, I.M., Meitei, C.B., Changloi, K.L., Singh, L.S., Singh, N.A., Saraswat, P.K., Ramakrishna, Y., Singh, D., Hazarika, S., Punitha, P., Sandhu, S.K., Prakash, N., 2021. Energy and carbon budgeting of traditional land use change with groundnut based cropping system for environmental quality, resilient soil health and farmers income in eastern Indian Himalayas. *Journal of Environmental Management* 293, 112892. <https://doi.org/10.1016/j.jenvman.2021.112892>.
- Antolín, M.C., Pascual, I., García, C., Polo, A., Sánchez-Díaz, M., 2005. Growth, yield and solute content of barley in soils treated with sewage sludge under semiarid Mediterranean conditions. *Field Crops Research* 94, 224–237. <https://doi.org/10.1016/j.fcr.2005.01.009>.
- Antonious, G.F., 2009. Enzyme activities and heavy metals concentration in soil amended with sewage sludge. *Journal of Environmental Science and Health - Part A Toxic/Hazardous Substances and Environmental Engineering* 44, 1019–1024. <https://doi.org/10.1080/10934520902996971>.
- Aon, M.A., and Colaneri, A.C., 2001. II. Temporal and spatial evolution of enzymatic activities and physico-chemical properties in an agricultural soil. *Applied Soil Ecology* 18, 255–270. [https://doi.org/10.1016/S0929-1393\(01\)00161-5](https://doi.org/10.1016/S0929-1393(01)00161-5).
- Aparna, K., Rao, D.L.N., Balachandar, D., 2016. Microbial Populations, Activity and Gene Abundance in Tropical Vertisols Under Intensive Chemical Farming. *Pedosphere* 26, 725–732. [https://doi.org/10.1016/S1002-0160\(15\)60079-0](https://doi.org/10.1016/S1002-0160(15)60079-0).
- Aponte, H., Meli, P., Butler, B., Paolini, J., Matus, F., Merino, C., Cornejo, P., Kuzyakov, Y., 2020. Meta-analysis of heavy metal effects on soil enzyme activities. *Science of the Total Environment* 737, 139744. <https://doi.org/10.1016/j.scitotenv.2020.139744>.
- Arora, R., Sharma, V., Sharma, S., Maini, A., Dhaliwal, S.S., 2021. Temporal changes in soil biochemical properties with seasons under rainfed land use systems in Shiwalik foothills of northwest India. *Agroforestry Systems* 95, 1479–1491. <https://doi.org/10.1007/s10457-021-00654-2>.
- Arruda, B., Dall'orsoletta, D.J., Heidemann, J.C., Gatiboni, L.C., 2018. Phosphorus dynamics in the rhizosphere of two wheat cultivars in a soil with high organic matter content. *Archives of Agronomy and Soil Science* 64, 1011–1020. <https://doi.org/10.1080/03650340.2017.1407028>.
- Arun, T., Sridevi, S., Rani, K.R., 2020. Soil Hydrothermal Regimes, Biological Activity and Nutrient Availability under Various Mulches and Weed Management Practices in Tomato. *International Research Journal of Pure and Applied Chemistry* 21, 40–48. <https://doi.org/10.9734/irjpac/2020/v21i1730264>.
- Arya, S.R., Syriac, E.K., Aparna, B., 2018. Enzyme dynamics and organic carbon status of soil as influenced by flucetosulfuron in wet seeded rice. *Journal of Tropical Agriculture* 56, 1–8.
- Atoloye, I.A., Jacobson, A., Creech, E., Reeve, J., 2021. Variable impact of compost on phosphorus dynamics in organic dryland soils following a one-time application. *Soil*

Science Society of America Journal 85, 1122–1138.  
<https://doi.org/10.1002/saj2.20275>.

- Avila-Salem, M.E., Montesdeoca, F., Orellana, M., Pacheco, K., Alvarado, S., Becerra, N., Marín, C., Borie, F., Aguilera, P., Cornejo, P., 2020. Soil Biological Properties and Arbuscular Mycorrhizal Fungal Communities of Representative Crops Established in the Andean Region from Ecuadorian Highlands. *Journal of Soil Science and Plant Nutrition* 20, 2156–2163. <https://doi.org/10.1007/s42729-020-00283-1>.
- Azeem, M., Ali, A., Jeyasundar, P.G.S.A., Li, Y., Abdelrahman, H., Latif, A., Li, R., Basta, N., Li, G., Shaheen, S.M., Rinklebe, J., Zhang, Z., 2021. Bone-derived biochar improved soil quality and reduced Cd and Zn phytoavailability in a multi-metal contaminated mining soil. *Environmental Pollution* 277. <https://doi.org/10.1016/j.envpol.2021.116800>.
- Babu, S., Singh, R., Avasthe, R.K., Yadav, G.S., Das, A., Singh, V.K., Mohapatra, K.P., Rathore, S.S., Chandra, P., Kumar, A., 2020. Impact of land configuration and organic nutrient management on productivity, quality and soil properties under baby corn in Eastern Himalayas. *Scientific Reports* 10, 1–14. <https://doi.org/10.1038/s41598-020-73072-6>.
- Bachmann, S., Gropp, M., Eichler-Löbermann, B., 2014. Phosphorus availability and soil microbial activity in a 3 year field experiment amended with digested dairy slurry. *Biomass and Bioenergy* 70, 429–439. <https://doi.org/10.1016/j.biombioe.2014.08.004>.
- Bačmaga, M., Kucharski, J., Wyszowska, J., 2019. Microbiological and biochemical properties of soil polluted with a mixture of spiroxamine, tebuconazole, and triadimenol under the cultivation of *Triticum aestivum* L. *Environmental Monitoring and Assessment* 191. <https://doi.org/10.1007/s10661-019-7539-4>.
- Balachandar, R., Biruntha, M., Yuvaraj, A., Thangaraj, R., Subbaiya, R., Govarthanan, M., Kumar, P., Karmegam, N., 2021. Earthworm intervened nutrient recovery and greener production of vermicompost from *Ipomoea staphylina* – An invasive weed with emerging environmental challenges. *Chemosphere* 263. <https://doi.org/10.1016/j.chemosphere.2020.128080>.
- Baligar, V.C., Wright, R.J., Hern, J.L., 2005. Enzyme activities in soil influenced by levels of applied sulfur and phosphorus. *Communications in Soil Science and Plant Analysis* 36, 1727–1735. <https://doi.org/10.1081/CSS-200062431>.
- Balota, E.L., Kanashiro, M., Filho, A.C., Andrade, D.S., Dick, R.P., 2004. Soil enzyme activities under long-term tillage and crop rotation systems in subtropical agro-ecosystems. *Brazilian Journal of Microbiology* 35, 300–306. <https://doi.org/10.1590/S1517-83822004000300006>.
- Balota E. L., Chaves D., César J., 2010. Enzymatic activity and mineralization of carbon and nitrogen in soil cultivated with coffee and green manures. *Rev. Bras. Ciênc. Solo*.2010;34(5):1573-83. DOI: 10.1590/S0100-06832010000500010.
- Balota, E.L., Machineski, O., Truber, P.V., 2011a. Soil enzyme activities under pig slurry addition and different tillage systems. *Acta Scientiarum. Agronomy* 33, 729–737. <https://doi.org/10.4025/actasciagron.v33i4.9816>



- Balota, E.L., Machineski, O., Truber, P.V., Antonio, P., Auler, M., 2011b. Effect of tillage systems and permanent groundcover intercropped with orange trees on soil enzyme activities. *Brazilian Archives of Biology and Technology* 54, 221–228.
- Balota, E.L., Machineski, O., Hamid, K.I.A., Yada, I.F.U., Barbosa, G.M.C., Nakatani, A.S., Coyne, M.S., 2014. Soil microbial properties after long-term swine slurry application to conventional and no-tillage systems in Brazil. *Science of the Total Environment* 490, 397–404. <https://doi.org/10.1016/j.scitotenv.2014.05.019>.
- Bana, R.S., Grover, M., Kumar, V., Jat, G.S., Kuri, B.R., Singh, D., Kumar, H., Bamboriya, S.D., 2022a. Multi-micronutrient foliar fertilization in eggplant under diverse fertility scenarios: Effects on productivity, nutrient biofortification and soil microbial activity. *Scientia Horticulturae* 294, 110781. <https://doi.org/10.1016/j.scienta.2021.110781>.
- Bana, R.S., Jat, G.S., Grover, M., Bamboriya, S.D., Singh, D., Bansal, R., Choudhary, A.K., Kumar, V., Laing, A.M., Godara, S., Bana, R.C., Kumar, H., Kuri, B.R., Yadav, A., Singh, T., 2022b. Foliar nutrient supplementation with micronutrient-embedded fertilizer increases biofortification, soil biological activity and productivity of eggplant. *Scientific Reports* 12, 1–16. <https://doi.org/10.1038/s41598-022-09247-0>.
- Banerjee, M.R., Burton, D.L., Grant, C.A., 1999. Influence of urea fertilization and urease inhibitor on the size and activity of the soil microbial biomass under conventional and zero tillage at two sites. *Canadian Journal of Soil Science* 79, 255–263. <https://doi.org/10.4141/S97-049>.
- Banerjee, K., Dasgupta, S., Oulkar, D.P., Patil, S.H., Adsule, P.G., 2008. Degradation kinetics of forchlorfenuron in typical grapevine soils of India and its influence on specific soil enzyme activities. *Journal of Environmental Science and Health - Part B Pesticides, Food Contaminants, and Agricultural Wastes* 43, 341–349. <https://doi.org/10.1080/03601230801941691>.
- Banik, P., Ghosal, P.K., Sasmal, T.K., Bhattacharya, S., Sarkar, B.K., Bagchi, D.K., 2006. Effect of organic and inorganic nutrients for soil quality conservation and yield of rainfed low land rice in sub-tropical plateau region. *Journal of Agronomy and Crop Science* 192, 331–343. <https://doi.org/10.1111/j.1439-037X.2006.00219.x>.
- Barcelos Martins L.N., de Aguiar Santiago F.L., Montecchia M.S., Correa O.S., Saggin Junior O.J., Damacena de Souza E., Barbosa Paulino H., Carbone Carneiro M.A., 2019. 'Biochemical and Biological Properties of Soil from Murundus Wetlands Converted into Agricultural Systems'. *Revista Brasileira de Ciencia do Solo*, 43 :e0180183. <https://doi.org/10.1590/18069657rbcs20180183>.
- Bardgett, R.D., and Leemans, D.K., 1995. The short-term effects of cessation of fertiliser applications, liming, and grazing on microbial biomass and activity in a reseeded upland grassland soil. *Biology and Fertility of Soils* 19, 148–154. <https://doi.org/10.1007/BF00336151>.
- Bartkowiak, A., Dąbkowska-Naskręt, H., Lemanowicz, J., Siwik-Ziomek, A., 2021. Assessment of physicochemical and biochemical factors of urban street dust. *Environment Protection Engineering*. 43: 155-164. [10.37190/epe170311](https://doi.org/10.37190/epe170311).
- Basak, N., Mandal, B., Datta, A., Mitran, T., Biswas, S., Dhar, D., Badole, S., Saha, B., Hazra, G.C., 2017. Impact of Long-Term Application of Organics, Biological, and Inorganic Fertilizers on Microbial Activities in Rice-Based Cropping System.

Communications in Soil Science and Plant Analysis 48, 2390–2401.  
<https://doi.org/10.1080/00103624.2017.1411502>.

- Basak, B.B., and Gajbhiye, N.A., 2018. Phosphorus enriched organic fertilizer, an effective P source for improving yield and bioactive principle of Senna (*Cassia angustifolia* Vahl.). *Industrial Crops and Products* 115, 208–213.  
<https://doi.org/10.1016/j.indcrop.2018.02.026>.
- Baziramakenga, R., Simard, R.R., Lalande, R., 2001. Effect of de-inking paper sludge compost application on soil chemical and biological properties. *Canadian Journal of Soil Science* 81, 561–575. <https://doi.org/10.4141/S00-063>.
- Becagli, M., Arduini, I., Cardelli, R., 2022. Using Biochar and Vermiwash to Improve Biological Activities of Soil. *Agriculture (Switzerland)* 12.  
<https://doi.org/10.3390/agriculture12020178>.
- Belyaeva, O.N., Haynes, R.J., Birukova, O.A., 2005. Barley yield and soil microbial and enzyme activities as affected by contamination of two soils with lead, zinc or copper. *Biology and Fertility of Soils* 41, 85–94. <https://doi.org/10.1007/s00374-004-0820-9>.
- Benbrik, B., Elabed, A., Iraqui, M., Ghachtouli, N.E., Douira, A., Amir, S., Filali-Maltouf, A., Abed, S.E., Modafar, C.E., Ibensouda-Koraichi, S., 2021. A phosphocompost amendment enriched with PGPR consortium enhancing plants growth in deficient soil. *Communications in Soil Science and Plant Analysis* 52, 1236–1247.  
<https://doi.org/10.1080/00103624.2021.1879121>.
- Benítez, E., Melgar, R., Sainz, H., Gómez, M., Nogales, R., 2000. Enzyme activities in the rhizosphere of pepper (*Capsicum annuum*, L.) grown with olive cake mulches. *Soil Biology and Biochemistry* 32, 1829–1835. [https://doi.org/10.1016/S0038-0717\(00\)00156-5](https://doi.org/10.1016/S0038-0717(00)00156-5).
- Bera, T., Collins, H.P., Alva, A.K., Purakayastha, T.J., Patra, A.K., 2016. Biochar and manure effluent effects on soil biochemical properties under corn production. *Applied Soil Ecology* 107, 360–367. <https://doi.org/10.1016/j.apsoil.2016.07.011>.
- Bergstrom, D.W., and Monreal, C.M., 1998a. Increased soil enzyme activities under two row crops. *Soil Science Society of America Journal* 62, 1295–1301.  
<https://doi.org/10.2136/sssaj1998.03615995006200050021x>.
- Bergstrom, D.W., Monreal, C.M., King, D.J., 1998b. Sensitivity of Soil Enzyme Activities to Conservation Practices. *Soil Science Society of America Journal* 62, 1286–1295.  
<https://doi.org/10.2136/sssaj1998.03615995006200050020x>.
- Beura, K., and Rakshit, A., 2013. Bt cotton influencing enzymatic activities under varied soils. *Open Journal of Ecology* 03, 505–509. <https://doi.org/10.4236/oje.2013.38059>.
- Bhambure, A.B., Mahajan, G.R., Kerkar, S., 2018. Salt Tolerant Bacterial Inoculants as Promoters of Rice Growth and Microbial Activity in Coastal Saline Soil. *Proceedings of the National Academy of Sciences India Section B - Biological Sciences* 88, 1531–1538. <https://doi.org/10.1007/s40011-017-0901-9>.
- Bhatt, B., Chandra, R., Ram, S., Pareek, N., 2016. Long-term effects of fertilization and manuring on productivity and soil biological properties under rice (*Oryza sativa*)–wheat (*Triticum aestivum*) sequence in Mollisols. *Archives of Agronomy and Soil Science* 62, 1109–1122. <https://doi.org/10.1080/03650340.2015.1125471>.

- Bhattacharyya, P., Pal, R., Chakraborty, A., Chakrabarti, K., 2001. Microbial biomass and activity in a laterite soil amended with municipal solid waste compost. *Journal of Agronomy and Crop Science* 187, 207–211. <https://doi.org/10.1046/j.1439-037x.2001.00517.x>.
- Bhattacharyya, P., Chakrabarti, K., Chakraborty, A., 2003. Residual effect of municipal solid waste compost on microbial biomass and activities in mustard growing soil: Restwirkung von müllkompost auf die mikrobielle biomasse und mikrobielle aktivitäten in boden mit senfbewuchs. *Archives of Agronomy and Soil Science* 49, 585–592. <https://doi.org/10.1080/03650340310001615147>.
- Bhattacharyya, P., Tripathy, S., Chakrabarti, K., Chakraborty, A., Banik, P., 2008. Fractionation and bioavailability of metals and their impacts on microbial properties in sewage irrigated soil. *Chemosphere* 72, 543–550. <https://doi.org/10.1016/j.chemosphere.2008.03.035>.
- Bi, Q.F., Zheng, B.X., Lin, X.Y., Li, K.J., Liu, X.P., Hao, X.L., Zhang, H., Zhang, J.B., Jaisi, D.P., Zhu, Y.G., 2018. The microbial cycling of phosphorus on long-term fertilized soil: Insights from phosphate oxygen isotope ratios. *Chemical Geology* 483, 56–64. <https://doi.org/10.1016/j.chemgeo.2018.02.013>.
- Bi, Q.F., Li, K.J., Zheng, B.X., Liu, X.P., Li, H.Z., Jin, B.J., Ding, K., Yang, X.R., Lin, X.Y., Zhu, Y.G., 2020. Partial replacement of inorganic phosphorus (P) by organic manure reshapes phosphate mobilizing bacterial community and promotes P bioavailability in a paddy soil. *Science of the Total Environment* 703, 134977. <https://doi.org/10.1016/j.scitotenv.2019.134977>.
- Billah, M., Khan, M., Bano, A., Nisa, S., Hussain, A., Dawar, K.M., Munir, A., Khan, K., 2020. Rock Phosphate-Enriched Compost in Combination with Rhizobacteria ; A Cost-Effective Source for Better Soil Health and Wheat. *Agronomy* 10.
- Bini, D., Santos, C.A.D., Bernal, L.P.T., Andrade, G., Nogueira, M.A., 2014. Identifying indicators of C and N cycling in a clayey Ultisol under different tillage and uses in winter. *Applied Soil Ecology* 76, 95–101. <https://doi.org/10.1016/j.apsoil.2013.12.015>.
- Bissonnette, N., Angers, D.A., Simard, R.R., Lafond, J., 2001. Interactive effects of management practices on water-stable aggregation and organic matter of a Humic Gleysol. *Canadian Journal of Soil Science* 81, 545–551. <https://doi.org/10.4141/S00-078>.
- Biswas S., Kundu D.K., Mazumdar S.P., Saha A.R., Majumdar B., Ghorai A.K., Ghosh D., Yadav A.N., Saxena A.K., 2018. Study on the activity and diversity of bacteria in a New Gangetic alluvial soil (Eutrocept) under rice-wheat- jute cropping system. *Journal of environmental biology*, 39: 379-386. <http://doi.org/10.22438/jeb/39/3/MRN-523>.
- Biswas, S.S., Biswas, D.R., Purakayastha, T.J., Sarkar, A., Kumar, R., Das, T.K., Barman, M., Pabbi, S., Ghosh, A., Pal, R., 2021. Residual effect of rock-phosphate and PSB on rice yield and soil properties. *Indian Journal of Agricultural sciences* 91, 440–444.
- Blaise, D., and Rao, M. R. K., 2004. Glucosidase and Alkaline Phosphatase Activity as Affected by Organic and Modern Method of Cotton (*Gossypium Hirsutum*) Cultivation of the Rainfed Vertisols'. *Indian Journal of Agricultural Sciences* 74(5):276–78.

- Bobul'ská, L., Fazekašová, D., Angelovičová, L., Kotorová, D., 2015. Impact of ecological and conventional farming systems on chemical and biological soil quality indices in a cold mountain climate in Slovakia. *Biological Agriculture and Horticulture* 31, 205–218. <https://doi.org/10.1080/01448765.2014.1002537>.
- Boccolini, M.F., Cazorla, C.R., Galantini, J.A., Belluccini, P.A., Baigorria, T., 2019. Cultivos de cobertura disminuyen el impacto ambiental mejorando propiedades biológicas del suelo y el rendimiento de los cultivos. *Revista de Investigaciones Agropecuarias* 45, 412–425.
- Böhme, L., Langer, U., Böhme, F., 2005. Microbial biomass, enzyme activities and microbial community structure in two European long-term field experiments. *Agriculture, Ecosystems and Environment* 109, 141–152. <https://doi.org/10.1016/j.agee.2005.01.017>.
- Bolton JR, H., Elliott, L.F., Papendick, R.I., Bezdicek, D.F., 1985. Soil microbial biomass and selected soil enzyme activities: effect of fertilization and cropping practices.. *Soil Biol. Biochem*, 17, 297-302. <http://dx.doi.org/10.1007/BF00257821>.
- Bolton, H., Smith, J.L., Link, S.O., 1993. Soil microbial biomass and activity of a disturbed and undisturbed shrub-steppe ecosystem. *Soil Biology and Biochemistry* 25, 545–552. [https://doi.org/10.1016/0038-0717\(93\)90192-E](https://doi.org/10.1016/0038-0717(93)90192-E).
- Borase, D.N., Nath, C.P., Hazra, K.K., Senthilkumar, M., Singh, S.S., Praharaj, C.S., Singh, U., Kumar, N., 2020. Long-term impact of diversified crop rotations and nutrient management practices on soil microbial functions and soil enzymes activity. *Ecological Indicators* 114, 106322. <https://doi.org/10.1016/j.ecolind.2020.106322>.
- Borase, D.N., Murugeasn, S., Nath, C.P., Hazra, K.K., Singh, S.S., Kumar, N., Singh, U., Praharaj, C.S., 2021. Long-term impact of grain legumes and nutrient management practices on soil microbial activity and biochemical properties. *Archives of Agronomy and Soil Science* 67, 2015–2032. <https://doi.org/10.1080/03650340.2020.1819532>.
- Bossio, D.A., Girvan, M.S., Verchot, L., Bullimore, J., Borelli, T., Albrecht, A., Scow, K.M., Ball, A.S., Pretty, J.N., Osborn, A.M., 2005. Soil microbial community response to land use change in an agricultural landscape of western Kenya. *Microbial Ecology* 49, 50–62. <https://doi.org/10.1007/s00248-003-0209-6>.
- Brackin, R., Robinson, N., Lakshmanan, P., Schmidt, S., 2014. Soil microbial responses to labile carbon input differ in adjacent sugarcane and forest soils. *Soil Research* 52, 307–316. <https://doi.org/10.1071/SR13276>.
- Brennan, E.B., and Acosta-Martinez, V., 2019. Cover Crops and Compost Influence Soil Enzymes during Six Years of Tillage-Intensive, Organic Vegetable Production. *Soil Science Society of America Journal* 83, 624–637. <https://doi.org/10.2136/sssaj2017.12.0412>.
- Buck, C., Langmaack, M., Schrader, S., 2000. Influence of mulch and soil compaction on earthworm cast properties. *Applied Soil Ecology* 14, 223–229. [https://doi.org/10.1016/S0929-1393\(00\)00054-8](https://doi.org/10.1016/S0929-1393(00)00054-8).
- Butterly, C.R., McNeill, A.M., Baldock, J.A., Marschner, P., 2011. Changes in water content of two agricultural soils does not alter labile P and C pools. *Plant and Soil* 348, 185–201. <https://doi.org/10.1007/s11104-011-0931-7>.

- Caballero Vanegas J.J., Mejía Zambrano K.B., Avellaneda-Torres L.M., 2018. Effect of ecological and conventional managements on soil enzymatic activities in coffee agroecosystems.. *Pesquisa Agropecuaria Tropical*, Goiânia, 48 (4): 420-428. 10.1590/1983-40632018v4852373.
- Calvarro, L.M., Santiago-Martín, A. de, Gómez, J.Q., González-Huecas, C., Quintana, J.R., Vázquez, A., Lafuente, A.L., Fernández, T.M.R., Vera, R.R., 2014. Biological activity in metal-contaminated calcareous agricultural soils: The role of the organic matter composition and the particle size distribution. *Environmental Science and Pollution Research* 21, 6176–6187. <https://doi.org/10.1007/s11356-014-2561-0>.
- Campbell, C.A., Biederbeck, V.O., Schnitzer, M., Selles, F., Zentner, R.P., 1989. Effect of 6 Years of Zero Tillage and N Fertilizer Management on Changes in Soil Quality of an Orthic Brown Chernozem in Southwestern Saskatchewan.. *Soil & Tillage Research*, 14, 39-52. [http://dx.doi.org/10.1016/0167-1987\(89\)90019-6](http://dx.doi.org/10.1016/0167-1987(89)90019-6).
- Cao, N., Zhi, M., Zhao, W., Pang, J., Hu, W., Zhou, Z., Meng, Y., 2021. Straw retention combined with phosphorus fertilizer promotes soil phosphorus availability by enhancing soil P-related enzymes and the abundance of phoC and phoD genes. *Soil and Tillage Research* 220, 105390. <https://doi.org/10.1016/j.still.2022.105390>.
- Cao, Q., Li, G., Yang, F., Kong, F., Cui, Z., Jiang, X., Lu, Y., Zhang, E., 2022. Eleven-year mulching and tillage practices alter the soil quality and bacterial community composition in Northeast China. *Archives of Agronomy and Soil Science* 68, 1274–1289. <https://doi.org/10.1080/03650340.2021.1890719>.
- Caravaca, F., Masciandaro, G., Ceccanti, B., 2002. Land use in relation to soil chemical and biochemical properties in a semiarid Mediterranean environment. *Soil and Tillage Research* 68, 23–30. [https://doi.org/10.1016/S0167-1987\(02\)00080-6](https://doi.org/10.1016/S0167-1987(02)00080-6).
- Carbonell, G., Pro, J., Gómez, N., Babín, M.M., Fernández, C., Alonso, E., Tarazona, J.V., 2009. Sewage sludge applied to agricultural soil: Ecotoxicological effects on representative soil organisms. *Ecotoxicology and Environmental Safety* 72, 1309–1319. <https://doi.org/10.1016/j.ecoenv.2009.01.007>.
- Carlos, F.S., Schaffer, N., Mariot, R.F., Fernandes, R.S., Boechat, C.L., Roesch, L.F.W., Camargo, F.A. de O., 2022. Soybean crop incorporation in irrigated rice cultivation improves nitrogen availability, soil microbial diversity and activity, and growth of ryegrass. *Applied Soil Ecology* 170. <https://doi.org/10.1016/j.apsoil.2021.104313>.
- Carpenter-Boggs, L., Stahl, P.D., Lindstrom, M.J., Schumacher, T.E., 2003. Soil microbial properties under permanent grass, conventional tillage, and no-fill management in South Dakota. *Soil and Tillage Research* 71, 15–23. [https://doi.org/10.1016/S0167-1987\(02\)00158-7](https://doi.org/10.1016/S0167-1987(02)00158-7).
- Carricondo-Martínez, I., Falcone, D., Berti, F., Orsini, F., Salas-Sanjuan, M.D.C., 2022. Use of Agro-Waste as a Source of Crop Nutrients in Intensive Horticulture System. *Agronomy* 12, 1–12. <https://doi.org/10.3390/agronomy12020447>.
- Carter, M.R., Sanderson, J.B., Holmstrom, D.A., Ivany, J.A., DeHaan, K.R., 2007. Influence of conservation tillage and glyphosate on soil structure and organic carbon fractions through the cycle of a 3-year potato rotation in Atlantic Canada. *Soil and Tillage Research* 93, 206–221. <https://doi.org/10.1016/j.still.2006.04.004>.

- Castillo, C., Montoya, Á., Borie, F., 2017. Efecto de pre-cultivos hospederos y no hospederos en el crecimiento y propágulos micorrizicos de trigo en Andisol e Inceptisol de Chile. *Chilean Journal of Agricultural and Animal Sciences* 33, 252–262. <https://doi.org/10.4067/s0719-38902017005000703>.
- Casucci, C., Okeke, B.C., Frankenberger, W.T., 2003. Effects of mercury on microbial biomass and enzyme activities in soil. *Biological Trace Element Research* 94, 179–191. <https://doi.org/10.1385/BTER:94:2:179>.
- Cattaneo, F., Gennaro, P.D., Barbanti, L., Giovannini, C., Labra, M., Moreno, B., Benitez, E., Marzadori, C., 2014. Perennial energy cropping systems affect soil enzyme activities and bacterial community structure in a South European agricultural area. *Applied Soil Ecology* 84, 213–222. <https://doi.org/10.1016/j.apsoil.2014.08.003>.
- Caudle, C., Osmond, D., Heitman, J., Ricker, M., Miller, G., Wills, S., 2020. Comparison of soil health metrics for a Cecil soil in the North Carolina Piedmont. *Soil Science Society of America Journal* 84, 978–993. <https://doi.org/10.1002/saj2.20075>.
- Chakrabarti, K., Sarkar, B., Chakraborty, A., Banik, P., Bagchi, D.K., 2000. Organic recycling for soil quality conservation in a sub-tropical plateau region. *Journal of Agronomy and Crop Science* 184, 137–142. <https://doi.org/10.1046/j.1439-037X.2000.00352.x>
- Chander, K., Goyal, S., Mundra, M.C., Kapoor, K.K., 1997. Organic matter, microbial biomass and enzyme activity of soils under different crop rotations in the tropics. *Biology and Fertility of Soils* 24, 306–310. <https://doi.org/10.1007/s003740050248>.
- Chang, E.-H., Chung, R.-S., Tsai, Y.-H., 2007. Effect of different application rates of organic fertilizer on soil enzyme activity and microbial population: Original article. *Soil Science and Plant Nutrition* 53, 132–140. <https://doi.org/10.1111/j.1747-0765.2007.00122.x>.
- Chatterjee, D., Nayak, A.K., Mishra, A., Swain, C.K., Kumar, U., Bhaduri, D., Panneerselvam, P., Lal, B., Gautam, P., Pathak, H., 2021. Effect of Long-Term Organic Fertilization in Flooded Rice Soil on Phosphorus Transformation and Phosphate Solubilizing Microorganisms. *Journal of Soil Science and Plant Nutrition* 21, 1368–1381. <https://doi.org/10.1007/s42729-021-00446-8>.
- Chaudhary, D.R., Gautam, R.K., Ghosh, A., Chikara, J., Jha, B., 2015. Effect of Nitrogen Management on Soil Microbial Community and Enzymatic Activities in *Jatropha curcas* L. Plantation. *Clean - Soil, Air, Water* 43, 1058–1065. <https://doi.org/10.1002/clen.201400357>.
- Chaudhary, P., Sharma, A., Chaudhary, A., Khati, P., Gangola, S., Maithani, D., 2021. Illumina based high throughput analysis of microbial diversity of maize rhizosphere treated with nanocompounds and *Bacillus* sp. *Applied Soil Ecology* 159. <https://doi.org/10.1016/j.apsoil.2020.103836>.
- Chaudhary, P., Chaudhary, A., Bhatt, P., Kumar, G., Khatoon, H., Rani, A., Kumar, S., Sharma, A., 2022. Assessment of Soil Health Indicators Under the Influence of Nanocompounds and *Bacillus* spp. in Field Condition. *Frontiers in Environmental Science* 9, 1–11. <https://doi.org/10.3389/fenvs.2021.769871>.
- Chavarría, D.N., Verdenelli, R.A., Serri, D.L., Restovich, S.B., Andriulo, A.E., Meriles, J.M., Vargas-Gil, S., 2016. Effect of cover crops on microbial community structure and

related enzyme activities and macronutrient availability. *European Journal of Soil Biology* 76, 74–82. <https://doi.org/10.1016/j.ejsobi.2016.07.002>.

Chellappa, J., Sagar, K.L., Sekaran, U., Kumar, S., Sharma, P., 2021. Soil organic carbon, aggregate stability and biochemical activity under tilled and no-tilled agroecosystems. *Journal of Agriculture and Food Research* 4, 100139. <https://doi.org/10.1016/j.jafr.2021.100139>.

Chen, S.-K., Edwards, C.A., Subler, S., 2001. A microcosm approach for evaluating the effects of the fungicides benomyl and captan on soil ecological processes and plant growth. *Applied Soil Ecology* 18, 69–82. [https://doi.org/10.1016/S0929-1393\(01\)00135-4](https://doi.org/10.1016/S0929-1393(01)00135-4).

Chen, S.-K., Edwards, C.A., Subler, S., 2003. The influence of two agricultural biostimulants on nitrogen transformations, microbial activity, and plant growth in soil microcosms. *Soil Biology and Biochemistry* 35, 9–19. [https://doi.org/10.1016/S0038-0717\(02\)00209-2](https://doi.org/10.1016/S0038-0717(02)00209-2).

Chen, C.R., Condon, L.M., Davis, M.R., Sherlock, R.R., 2004. Effects of plant species on microbial biomass phosphorus and phosphatase activity in a range of grassland soils. *Biology and Fertility of Soils* 40, 313–322. <https://doi.org/10.1007/s00374-004-0781-z>.

Chen, S., Qi, G., Luo, T., Zhang, H., Jiang, Q., Wang, R., Zhao, X., 2018. Continuous-cropping tobacco caused variance of chemical properties and structure of bacterial network in soils. *Land Degradation and Development* 29, 4106–4120. <https://doi.org/10.1002/ldr.3167>

Chen, S., Cade-Menun, B.J., Bainard, L.D., Luce, M.S., Hu, Y., Chen, Q., 2021a. The influence of long-term N and P fertilization on soil P forms and cycling in a wheat/fallow cropping system. *Geoderma* 404, 115274. <https://doi.org/10.1016/j.geoderma.2021.115274>.

Chen, Y.P., Tsai, C.F., Hameed, A., Chang, Y.J., Young, C.C., 2021b. Agricultural management and cultivation period alter soil enzymatic activity and bacterial diversity in litchi (*Litchi chinensis* Sonn.) orchards. *Botanical Studies* 62. <https://doi.org/10.1186/s40529-021-00322-9>.

Chen, Y.P., Tsai, C.F., Rekha, P.D., Ghate, S.D., Huang, H.Y., Hsu, Y.H., Liaw, L.L., Young, C.C., 2021c. Agricultural management practices influence the soil enzyme activity and bacterial community structure in tea plantations. *Botanical Studies* 62. <https://doi.org/10.1186/s40529-021-00314-9>.

Chocano, C., García, C., González, D., Aguilar, J.M. de, Hernández, T., 2016. Organic plum cultivation in the Mediterranean region: The medium-term effect of five different organic soil management practices on crop production and microbiological soil quality. *Agriculture, Ecosystems and Environment* 221, 60–70. <https://doi.org/10.1016/j.agee.2016.01.031>.

Choudhary, M., Sharma, P.C., Jat, H.S., McDonald, A., Jat, M.L., Choudhary, S., Garg, N., 2018a. Soil biological properties and fungal diversity under conservation agriculture in indo-gangetic plains of india. *Journal of Soil Science and Plant Nutrition* 18, 1142–1156. <https://doi.org/10.4067/S0718-95162018005003201>.

- Choudhary, M., Jat, H.S., Datta, A., Yadav, A.K., Sapkota, T.B., Mondal, S., Meena, R.P., Sharma, P.C., Jat, M.L., 2018b. Sustainable intensification influences soil quality, biota, and productivity in cereal-based agroecosystems. *Applied Soil Ecology* 126, 189–198. <https://doi.org/10.1016/j.apsoil.2018.02.027>.
- Choudhary, M., Datta, A., Jat, H.S., Yadav, A.K., Gathala, M.K., Sapkota, T.B., Das, A.K., Sharma, P.C., Jat, M.L., Singh, R., Ladha, J.K., 2018c. Changes in soil biology under conservation agriculture based sustainable intensification of cereal systems in Indo-Gangetic Plains. *Geoderma* 313, 193–204. <https://doi.org/10.1016/j.geoderma.2017.10.041>.
- Choudhary, M., Meena, V.S., Panday, S.C., Mondal, T., Yadav, R.P., Mishra, P.K., Bisht, J.K., Pattanayak, A., 2021. Long-term effects of organic manure and inorganic fertilization on biological soil quality indicators of soybean-wheat rotation in the Indian mid-Himalaya. *Applied Soil Ecology* 157, 103754. <https://doi.org/10.1016/j.apsoil.2020.103754>.
- Chowdhury, N., and Rasid, M.M., 2021a. Heavy metal concentrations and its impact on soil microbial and enzyme activities in agricultural lands around ship yards in Chattogram, Bangladesh. *Soil Science Annual* 72, 1–21. <https://doi.org/10.37501/soilsa/135994>.
- Chowdhury, N. and Rasid, M.M., 2021b. Evaluation of brick kiln operation impact on soil microbial biomass and enzyme activity. *Soil Science Annual* 72, 1–16. <https://doi.org/10.37501/soilsa/132232>.
- Cicatelli, A., Baldantoni, D., Iovieno, P., Carotenuto, M., Alfani, A., Feis, I.D., Castiglione, S., 2014. Genetically biodiverse potato cultivars grown on a suitable agricultural soil under compost amendment or mineral fertilization: Yield, quality, genetic and epigenetic variations, soil properties. *Science of the Total Environment* 493, 1025–1035. <https://doi.org/10.1016/j.scitotenv.2014.05.122>.
- Colvan, S.R., Syers, J.K., O'Donnell, A.G., 2001. Effect of long-term fertiliser use on acid and alkaline phosphomonoesterase and phosphodiesterase activities in managed grassland. *Biology and Fertility of Soils* 34, 258–263. <https://doi.org/10.1007/s003740100411>.
- Cui, H., Zhou, Y., Gu, Z., Zhu, H., Fu, S., Yao, Q., 2015. The combined effects of cover crops and symbiotic microbes on phosphatase gene and organic phosphorus hydrolysis in subtropical orchard soils. *Soil Biology and Biochemistry* 82, 119–126. <https://doi.org/10.1016/j.soilbio.2015.01.003>.
- Cui, Y., Fang, L., Guo, X., Wang, X., Wang, Y., Zhang, Y., Zhang, X., 2019. Responses of soil bacterial communities, enzyme activities, and nutrients to agricultural-to-natural ecosystem conversion in the Loess Plateau, China. *Journal of Soils and Sediments* 19, 1427–1440. <https://doi.org/10.1007/s11368-018-2110-4>.
- Cui, H., Luo, Y., Chen, J., Jin, M., Li, Y., Wang, Z., 2022. Straw return strategies to improve soil properties and crop productivity in a winter wheat-summer maize cropping system. *European Journal of Agronomy* 133, 126436. <https://doi.org/10.1016/j.eja.2021.126436>.
- Cycoń, M., Wójcik, M., Borymski, S., Piotrowska-Seget, Z., 2013. Short-term effects of the herbicide napropamide on the activity and structure of the soil microbial



community assessed by the multi-approach analysis. *Applied Soil Ecology* 66, 8–18. <https://doi.org/10.1016/j.apsoil.2013.01.014>.

Cycoń, M., and Piotrowska-Seget, Z., 2015. Biochemical and microbial soil functioning after application of the insecticide imidacloprid. *Journal of Environmental Sciences (China)* 27, 147–158. <https://doi.org/10.1016/j.jes.2014.05.034>.

D'Ascoli, R., Rao, M.A., Adamo, P., Renella, G., Landi, L., Rutigliano, F.A., Terribile, F., Gianfreda, L., 2006. Impact of river overflowing on trace element contamination of volcanic soils in south Italy: Part II. Soil biological and biochemical properties in relation to trace element speciation. *Environmental Pollution* 144, 317–326. <https://doi.org/10.1016/j.envpol.2005.11.017>.

Da Cunha, J.R., de Cassia de Freitas, R., de Almeida Taveres Souza, D.J., Santana Gualberto, A.V., de Souza, H.A., Carvalho Leite, L.F., 2021. Soil Biological Attributes in Monoculture and Integrated Systems in the Cerrado Region of Piauí State, Brazil. *ACTA SCIENTIARUM-AGRONOMY* 43. doi: 10.4025/actasciagron.v43i1.51814.

da Silva Xavier F.A., da Silva Pereira B.L., de Almeida Souza E., Borges A.L., Ferreira Coelho E., 2020. Irrigation Systems, Fertigation and Mulch: Effects on the Physical, Chemical and Biological Attributes of the Soil with Banana Crop in Northeastern Brazil.. *Communications in soil science and plant analysis*, 51 (20): 2592–2605. <https://doi.org/10.1080/00103624.2020.1845359>.

Damian, J.M., Matos, E. da S., Pedreira, B.C. e, Carvalho, P.C. de F., Souza, A.J. de, Andreote, F.D., Premazzi, L.M., Cerri, C.E.P., 2021. Pastureland intensification and diversification in Brazil mediate soil bacterial community structure changes and soil C accumulation. *Applied Soil Ecology* 160. <https://doi.org/10.1016/j.apsoil.2020.103858>.

Dar, G., 1996. Effects of cadmium and sewage-sludge on soil microbial biomass and enzyme activities. *Bioresource Technology [BIORESOURC TECHNOL]* 56 Using Sm, 2–3.

Das, S.K., Ghosh, G.K., Avasthe, R., Choudhury, B.U., Mishra, V.K., Kundu, M.C., Roy, A., Mondal, T., Lama, A., Dhakre, D.S., 2021. Organic nutrient sources and biochar technology on microbial biomass carbon and soil enzyme activity in maize-black gram cropping system. *Biomass Conversion and Biorefinery*. <https://doi.org/10.1007/s13399-021-01625-4>.

Datta, A., Choudhary, M., Jat, H.S., Sharma, P.C., Kakraliya, S.K., Dixit, B., Jat, M.L., 2021. Climate smart agriculture influences soil enzymes activity under cereal-based systems of north-west india. *Journal of the Indian Society of Soil Science* 69, 86–95. <https://doi.org/10.5958/0974-0228.2021.00024.4>.

De Barros J.A, Valente De Medeiros E., Paes Da Costa D., Pereira Duda G., Romualdo De Sousa Lima J., Dos Santos U.J, Celso Dantas A. Antonino, Hammecker C., 2019. Human disturbance affects enzyme activity, microbial biomass and organic carbon in tropical dry sub-humid pasture and forest soils.. *Archives of Agronomy and Soil Science*, 66(4) : 458–472. <https://doi.org/10.1080/03650340.2019.1622095>.

De Cássia M., Moraes H d S., Valente de Medeiros E., da Silva de Andrade D., Dias de Lima L., da Silva Santos I.C., Pereira Martins Filho A., 2018. Microbial biomass and enzymatic activities in sandy soil cultivated with lettuce inoculated with plant growth promoters.. *Revista Caatinga*, 31(4): 860-870. <http://dx.doi.org/10.1590/1983-21252018v31n408rc>.

- de Castro Lopes, A., Gomes de Sousa, D. M., Chaer, G. M., Bueno dos Reis Junior, F., Goedert, W. J., de Carvalho Mendes, I., 2013. Interpretation of Microbial Soil Indicators as a Function of Crop Yield and Organic Carbon. *Soil Science Society of America Journal*, 77, 461. <http://dx.doi.org/10.2136/sssaj2012.0191>.
- de Castro Lopes, A.A., Bogiani, J.C., de Figueiredo, C.C., dos Reis Junior, F.B., de Sousa, D.M.G., Malaquias, J.V., de Carvalho Mendes, I., 2021. Enzyme activities in a sandy soil of Western Bahia under cotton production systems: short-term effects, temporal variability, and the FERTBIO sample concept: *Brazilian Journal of Microbiology*, 52: 2193-2204. [10.1007/s42770-021-00606-z](https://doi.org/10.1007/s42770-021-00606-z).
- de Jesus Franco A., Valadares da Silva A.P., Silva Souza A.B., Loverde Oliveira R., Rodrigues Batista E., Damacena de Souza E., Oliveira Silva A., Carbone Carneiro M.A., 2020. Plant diversity in integrated crop-livestock systems increases the soil enzymatic activity in the short term. *Pesquisa Agropecuaria Tropical*, Goiânia, 50: 1-11. [10.1590/1983-40632020v5064026](https://doi.org/10.1590/1983-40632020v5064026).
- de Oliveira Silva, E., Valente de Medeiros E., Pereira Duda G., Lira Junior M.A., Brossard M., Braga de Oliveira J., dos Santos U.J., Hammecker C., 2019. Seasonal Effect of Land Use Type on Soil Absolute and Specific Enzyme Activities in a Brazilian Semi-Arid Region. *Catena* 172(February 2018):397–407. doi: [10.1016/j.catena.2018.09.007](https://doi.org/10.1016/j.catena.2018.09.007).
- De Santiago-Martín, A., Cheviron N., Quintana J.R., González C., Lafuente A.L., Mougín C., 2013. Metal Contamination Disturbs Biochemical and Microbial Properties of Calcareous Agricultural Soils of the Mediterranean Area. *Archives of Environmental Contamination and Toxicology* 64(3):388–98. doi: [10.1007/s00244-012-9842-8](https://doi.org/10.1007/s00244-012-9842-8).
- De Varennes, A., and Torres M.O., 2011. Post-Fallow Tillage and Crop Effects on Soil Enzymes and Other Indicators. *Soil Use and Management* 27(1):18–27. doi: [10.1111/j.1475-2743.2010.00307.x](https://doi.org/10.1111/j.1475-2743.2010.00307.x).
- Delgado, M., Rodríguez, C., Martín, J.V., Imperial, R.M. de, Alonso, F., 2012. Environmental assay on the effect of poultry manure application on soil organisms in agroecosystems. *Science of the Total Environment* 416, 532–535. <https://doi.org/10.1016/j.scitotenv.2011.11.047>.
- Denton, M.D., Sasse, C., Tibbett, M., Ryan, M.H., 2006. Root distributions of Australian herbaceous perennial legumes in response to phosphorus placement. *Functional Plant Biology* 33, 1091–1102. <https://doi.org/10.1071/FP06176>.
- Dewey, K.A., Gaw, S.K., Northcott, G.L., Lauren, D.R., Hackenburg, S., 2012. The effects of copper on microbial activity and the degradation of atrazine and indoxacarb in a New Zealand soil. *Soil Biology and Biochemistry* 52, 64–74. <https://doi.org/10.1016/j.soilbio.2012.04.009>.
- Dey, S.K., Chakrabarti, B., Purakayastha, T.J., Prasanna, R., Mittal, R., Singh, S.D., Pathak, H., 2019. Interplay of phosphorus doses, cyanobacterial inoculation, and elevated carbon dioxide on yield and phosphorus dynamics in cowpea. *Environmental Monitoring and Assessment* 191. <https://doi.org/10.1007/s10661-019-7378-3>.
- Dhanker, R., Chaudhary, S., Goyal, S., Garg, V.K., 2020. Influence of urban sewage sludge amendment on agricultural soil parameters. *Environmental Technology and Innovation* 23, 101642. <https://doi.org/10.1016/j.eti.2021.101642>.

- Dhanker, R., Chaudhary, S., Goyal, S., Kumar, R., 2021. Soil microbial properties and functional diversity in response to sewage sludge amendments. *Archives of Agronomy and Soil Science* 68, 809–822.  
<https://doi.org/10.1080/03650340.2020.1855328>.
- Dhull, S., Goyal, S., Kapoor, K., Mundra, M., 2004. Microbial biomass carbon and microbial activities of soils receiving chemical fertilizers and organic amendments. *International Journal of Phytoremediation* 21, 641–647.  
<https://doi.org/10.1080/08927010400011294>.
- Diallo-Diagne, N.H., Assigbetse, K., Sall, S., Masse, D., Bonzi, M., Ndoye, I., Chotte, J.L., 2016. Response of Soil Microbial Properties to Long-Term Application of Organic and Inorganic Amendments in a Tropical Soil (Saria, Burkina Faso). *Open Journal of Soil Science* 06, 21–33. <https://doi.org/10.4236/ojss.2016.62003>.
- Dick, R.P., Rasmussen, P.E., Kerle, E.A., 1988. Influence of long-term residue management on soil enzyme activities in relation to soil chemical properties of a wheat-fallow system. *Biology and Fertility of Soils* 6, 159–164.  
<https://doi.org/10.1007/BF00257667>.
- Dick, R.P., Sandor, J.A., Eash, N.S., 1994. Soil enzyme activities after 1500 years of terrace agriculture in the Colca Valley, Peru. *Agriculture, Ecosystems and Environment* 50, 123–131. [https://doi.org/10.1016/0167-8809\(94\)90131-7](https://doi.org/10.1016/0167-8809(94)90131-7).
- Dick, W.A., 1984. Influence of Long-Term Tillage and Crop Rotation Combinations on Soil Enzyme Activities. *Soil Science Society of America Journal* 48, 569–574.  
<https://doi.org/10.2136/sssaj1984.03615995004800030020x>.
- Dick, W.A., Cheng, L., Wang, P., 2000. Soil acid and alkaline phosphatase activity as pH adjustment indicators. *Soil Biology and Biochemistry* 32, 1915–1919.  
[https://doi.org/10.1016/S0038-0717\(00\)00166-8](https://doi.org/10.1016/S0038-0717(00)00166-8).
- Dilly, O., 1999. Nitrogen and phosphorus requirement of the microbiota in soils of the Bornhoved Lake district. *Plant and Soil* 212, 175–183.
- Dinesh, R., Ramanathan, G., Singh, H., 1995. Influence of chloride and sulphate ions on soil enzymes. *Journal of Agronomy and Crop Science* 175, 129–133.  
<https://doi.org/10.1111/j.1439-037X.1995.tb01138.x>.
- Dinesh, R., Dubey, R.P., Prasad, G.S., 1998. Soil microbial biomass and enzyme activities as influenced by organic manure incorporation into soils of a rice-rice system. *Journal of Agronomy and Crop Science* 181, 173–178.  
<https://doi.org/10.1111/j.1439-037X.1998.tb00414.x>.
- Dinesh, R., Srinivasan, V., Hamza, S., Manjusha, A., Kumar, P.S., 2012. Short-term effects of nutrient management regimes on biochemical and microbial properties in soils under rainfed ginger (*Zingiber officinale* Rosc.). *Geoderma* 173–174, 192–198.  
<https://doi.org/10.1016/j.geoderma.2011.12.025>.
- Dolker, T., Mukherjee, A., Agrawal, S.B., Agrawal, M., 2020. Responses of a semi-natural grassland community of tropical region to elevated ozone: An assessment of soil dynamics and biomass accumulation. *Science of The Total Environment* 718, 137141. <https://doi.org/10.1016/j.scitotenv.2020.137141>.

- Dong, W.H., Zhang, S., Rao, X., Liu, C.A., 2016. Newly-reclaimed alfalfa forage land improved soil properties comparison to farmland in wheat-maize cropping systems at the margins of oases. *Ecological Engineering* 94, 57–64. <https://doi.org/10.1016/j.ecoleng.2016.05.056>.
- Dora, S.A., Domu, C.N., Maria, Ş., 2006. Soil Enzyme Activities Under Crop Rotations Systems in a Brown Luvic Soil. *Bulletin of University of Agricultural Sciences and Veterinary Medicine Cluj-Napoca. Agriculture* 62(0):2–7. doi: 10.15835/buasvmcn-agr:1578.
- Doran, J.W., 1980. Soil microbial and biochemical changes associated with reduced tillage.. *Soil Sci Soc Am J*, 44, 765-771.
- Dormaar, J.F., and Willms, W.D., 2000. Rangeland management impacts on soil biological indicators in southern Alberta. *Journal of Range Management* 53, 233–238. <https://doi.org/10.2307/4003289>.
- Dou, F., Wright A. L., Mylavaparuru R. S., Jiang X., Matocha J. E., 2016. Soil Enzyme Activities and Organic Matter Composition Affected by 26 Years of Continuous Cropping. *Pedosphere* 26(5):618–25. doi: 10.1016/S1002-0160(15)60070-4.
- Du, Z., Wang, Y., Huang, J., Lu, N., Liu, X., Lou, Y., Zhang, Q., 2014. Consecutive biochar application alters soil enzyme activities in the winter wheat-growing season. *Soil Science* 179, 75–83. <https://doi.org/10.1097/SS.0000000000000050>.
- Dubey, A.N., Chattopadhyaya, N., Mandal, N., 2021. Variation in Soil Microbial Population and Soil Enzymatic Activities Under Zincated Nanoclay Polymer Composites (ZNCPCs), Nano-ZnO and Zn Solubilizers in Rice Rhizosphere. *Agricultural Research* 10, 21–31. <https://doi.org/10.1007/s40003-020-00488-x>.
- Dubey, R.K., Dubey, P.K., Chaurasia, R., Singh, H.B., Abhilash, P.C., 2020. Sustainable agronomic practices for enhancing the soil quality and yield of *Cicer arietinum* L. under diverse agroecosystems. *Journal of Environmental Management* 262, 110284. <https://doi.org/10.1016/j.jenvman.2020.110284>.
- Durrer, A., Gumiere, T., Zagatto, M.R.G., Feiler, H.P., Silva, A.M.M., Longaresi, R.H., Homma, S.K., Cardoso, E.J.B.N., 2021. Organic farming practices change the soil bacteria community, improving soil quality and maize crop yields. *PeerJ* 9, 1–24. <https://doi.org/10.7717/peerj.11985>.
- Dutta, D., Meena, A.L., Kumar, G.C., Mishra, R.P., Ghasal, P.C., Kumar, Amit, Chaudhary, J., Bhanu, C., Kumar, V., Kumar, Ankur, Tewari, R.B., Panwar, A.S., 2020. Long Term Effect of Organic, Inorganic and Integrated Nutrient Management on Phosphorous Dynamics under Different Cropping Systems of Typic Ustochrept Soil of India. *Communications in Soil Science and Plant Analysis* 51, 2746–2763. <https://doi.org/10.1080/00103624.2020.1849258>.
- Efthimiadou, E., Papatheodorou, E.M., Monokrousos, N., Stamou, G.P., 2010. Changes of soil chemical, microbiological, and enzymatic variables in relation to management regime and the duration of organic farming in *Phaseolus vulgaris*. *Journal of Biological Research* 14, 151–159.
- Egamberdieva, D., Li, L., Ma, H., Wirth, S., Bellingrath-Kimura, S.D., 2019. Soil amendment with different maize biochars improves chickpea growth under different moisture levels by improving symbiotic performance with *mesorhizobium ciceri* and

soil biochemical properties to varying degrees. *Frontiers in Microbiology* 10, 1–14. <https://doi.org/10.3389/fmicb.2019.02423>.

- Eichler-Löbermann, B., Zicker, T., Kavka, M., Busch, S., Brandt, C., Stahn, P., Miegel, K., 2021. Mixed cropping of maize or sorghum with legumes as affected by long-term phosphorus management. *Field Crops Research* 265. <https://doi.org/10.1016/j.fcr.2021.108120>.
- Eivazi, F., Bayan, M.R., Schmidt, K., 2003. Select soil enzyme activities in the historic Sanborn Field as affected by long-term cropping systems. *Communications in Soil Science and Plant Analysis* 34, 2259–2275. <https://doi.org/10.1081/CSS-120024062>.
- El-Bassi, L., Azzaz, A.A., Jellali, S., Akrou, H., Marks, E.A.N., Ghimbeu, C.M., Jeguirim, M., 2021. Application of olive mill waste-based biochars in agriculture: Impact on soil properties, enzymatic activities and tomato growth. *Science of the Total Environment* 755, 142531. <https://doi.org/10.1016/j.scitotenv.2020.142531>.
- Elbl, J., Maková, J., Javoreková, S., Medo, J., Kintl, A., Lošák, T., Lukas, V., 2019. Response of microbial activities in soil to various organic and mineral amendments as an indicator of soil quality. *Agronomy* 9. <https://doi.org/10.3390/agronomy9090485>.
- Elfstrand, S., Båth, B., Mårtensson, A., 2007a. Influence of various forms of green manure amendment on soil microbial community composition, enzyme activity and nutrient levels in leek. *Applied Soil Ecology* 36, 70–82. <https://doi.org/10.1016/j.apsoil.2006.11.001>.
- Elfstrand, S., Hedlund, K., Mårtensson, A., 2007b. Soil enzyme activities, microbial community composition and function after 47 years of continuous green manuring. *Applied Soil Ecology* 35, 610–621. <https://doi.org/10.1016/j.apsoil.2006.09.011>.
- Emami, S., Alikhani, H.A., Pourbabae, A.A., Etesami, H., Sarmadian, F., Motesarezadeh, B., Taghizadeh-Mehrjardi, R., 2022. Performance Evaluation of Phosphate-Solubilizing Fluorescent Pseudomonads in Minimizing Phosphorus Fertilizer Use and Improving Wheat Productivity: a Two-Year Field Study. *Journal of Soil Science and Plant Nutrition* 22, 1224–1237. <https://doi.org/10.1007/s42729-021-00726-3>.
- Emmerling, C., Udelhoven, T., Schneider, R., 2010. Long-lasting impact of biowaste-compost application in agriculture on soil-quality parameters in three different crop-rotation systems. *Journal of Plant Nutrition and Soil Science* 173, 391–398. <https://doi.org/10.1002/jpln.200900348>.
- Evald, A., Melo, V.F., Rocha, P.R.R., Cordeiro, A.C.C., Maia, S.D.S., Espindola, I.D.C., 2021. Soil attributes under different water management systems of rice paddies in the amazonian savanna of brazil. *Revista Caatinga* 34, 640–649. <https://doi.org/10.1590/1983-21252021v34n316rc>.
- Farhangi-Abri, S., Ghassemi-Golezani, K., Torabian, S., 2021. A short-term study of soil microbial activities and soybean productivity under tillage systems with low soil organic matter. *Applied Soil Ecology* 168, 104122. <https://doi.org/10.1016/j.apsoil.2021.104122>.
- Feng, H., Sekaran, U., Wang, T., Kumar, S., 2021. On-farm assessment of cover cropping effects on soil C and N pools, enzyme activities, and microbial community

structure. *Journal of Agricultural Science* 159, 216–226.  
<https://doi.org/10.1017/S002185962100040X>.

- Fereidooni, M., Raiesi, F., Fallah, S., 2013. Ecological restoration of soil respiration, microbial biomass and enzyme activities through broiler litter application in a calcareous soil cropped with silage maize. *Ecological Engineering* 58, 266–277.  
<https://doi.org/10.1016/j.ecoleng.2013.06.032>
- Fernández-Calviño, D., Soler-Rovira, P., Polo, A., Díaz-Raviña, M., Arias-Estévez, M., Plaza, C., 2010. Enzyme activities in vineyard soils long-term treated with copper-based fungicides. *Soil Biology and Biochemistry* 42, 2119–2127.  
<https://doi.org/10.1016/j.soilbio.2010.08.007>.
- Fernández, L.A., Sagardoy, M.A., Gómez, M.A., 2008. Pampeana Norte Del Área Sojera Argentina Study of Acid and Alkaline Phosphatase in Soils of the Pampean North. *Ciencia del Suelo* 26, 35–40.
- Fernández, M.D., Alonso-Blázquez, M.N., García-Gómez, C., Babin, M., 2014. Evaluation of zinc oxide nanoparticle toxicity in sludge products applied to agricultural soil using multispecies soil systems. *Science of the Total Environment* 497–498, 688–696. <https://doi.org/10.1016/j.scitotenv.2014.07.085>.
- Ferreira-Vilela, LA., Saggin Júnior, O.J., Paulino, H.B., Siqueira, J.O., Santos, V.L.S., Carneiro, M.A.C., 2014. Arbuscular mycorrhizal fungus in microbial activity and aggregation of a cerrado Oxisol in crop sequence.. *Ciênc. Agrotec Lavras*, 38, 34-42.  
<http://dx.doi.org/10.1590/S0100-06832012000100006>.
- Ferreras, L., Toresani, S., Bonel, B., Fernández, E., Bacigaluppo, S., Faggioli, V., Beltrán, C., 2009. Parámetros químicos y biológicos como indicadores de calidad del suelo en diferentes manejos. *Ciencia del Suelo* 27, 103–114.
- Fialho, J.S., Gomes, V.F.F., de Oliveira, T.S., da Silva Jr, J.M.T., 2008. Indicadores da qualidade do solo, em sistema de rotação, na Chapada do Apodi-CE.. *Revista Ciência Agronômica*, 39, 353-361.  
<https://www.redalyc.org/articulo.oa?id=195317435001>.
- Figueira da Silva C., Pereira M.G., Gaia Gomes J.H., Fontes M.A., Ribeiro da Silva E.M., 2020. Enzyme Activity, Glomalin, and Soil Organic Carbon in Agroforestry Systems.. *Floresta e Ambiente*, 27: 1-9. <https://doi.org/10.1590/2179-8087.071617>.
- Firmano, R.F., Colzato, M., Bossolani, J.W., Colnago, L.A., Martin-Neto, L., Alleoni, L.R.F., 2021. Long-term lime and phosphogypsum broadcast affects phosphorus cycling in a tropical Oxisol cultivated with soybean under no-till. *Nutrient Cycling in Agroecosystems* 120, 307–324. <https://doi.org/10.1007/s10705-021-10151-8>.
- Fitriatin, B.N., Khumairah, F.H., Setiawati, M.R., Suryatmana, P., Hindersah, R., Herdiyantoro, A.N.D., Simarmata, T., 2018. Evaluation of biofertilizer consortium on rice at different salinity levels. *Asian Journal of Microbiology, Biotechnology and Environmental Sciences* 20, 1102–1105.
- Fitriatin, B.N., Amanda, A.P., Kamaluddin, N.N., Khumairah, F.H., Sofyan, E.T., Yuniarti, A., Turmuktini, T., 2021. Some soil biological and chemical properties as affected by biofertilizers and organic ameliorants application on paddy rice. *Eurasian Journal of Soil Science* 10, 105–110. <https://doi.org/10.18393/ejss.829695>.

- Fraç, M., 2011. Agricultural utilisation of dairy sewage sludge: Its effect on enzymatic activity and microorganisms of the soil environment. *African Journal of Microbiology Research* 5, 1755–1762. <https://doi.org/10.5897/ajmr10.707>.
- Franco-Otero, V.G., Soler-Rovira, P., Hernández, D., López-de-Sá, E.G., Plaza, C., 2012. Short-term effects of organic municipal wastes on wheat yield, microbial biomass, microbial activity, and chemical properties of soil. *Biology and Fertility of Soils* 48, 205–216. <https://doi.org/10.1007/s00374-011-0620-y>.
- Fraser, T., Lynch, D.H., Entz, M.H., Dunfield, K.E., 2015. Linking alkaline phosphatase activity with bacterial phoD gene abundance in soil from a long-term management trial. *Geoderma* 257–258, 115–122. <https://doi.org/10.1016/j.geoderma.2014.10.016>.
- Frazão, J.J., Benites, V. de M., Ribeiro, J.V.S., Pierobon, V.M., Lavres, J., 2019. Agronomic effectiveness of a granular poultry litter-derived organomineral phosphate fertilizer in tropical soils: Soil phosphorus fractionation and plant responses. *Geoderma* 337, 582–593. <https://doi.org/10.1016/j.geoderma.2018.10.003>.
- Furtak, K., Gawryjolek, K., Gajda, A.M., Gałazka, A., 2017. Effects of maize and winter wheat grown under different cultivation techniques on biological activity of soil. *Plant, Soil and Environment* 63, 449–454. <https://doi.org/10.17221/486/2017-PSE>.
- Futa, B., Kraska, P., Andruszczak, S., Gierasimiuk, P., Jaroszek-Sierocińska, M., 2021. Impact of subsurface application of compound mineral fertilizer on soil enzymatic activity under reduced tillage. *Agronomy* 11, 1–20. <https://doi.org/10.3390/agronomy11112213>.
- Gagnon, B., Lalande, R., Simard, R.R., Roy, M., 1999. Soil enzyme activities following paper sludge addition in a winter cabbage-sweet corn rotation. *Canadian Journal of Soil Science* 80, 91–97. <https://doi.org/10.4141/S99-033>.
- Gagnon, B., Simard, R.R., Lalande, R., Lafond, J., 2003. Improvement of soil properties and fruit yield of native lowbush blueberry by papermill sludge addition. *Canadian Journal of Soil Science* 83, 1–9. <https://doi.org/10.4141/S02-011>.
- Gaind, S., and Nain, L., 2007. Chemical and biological properties of wheat soil in response to paddy straw incorporation and its biodegradation by fungal inoculants. *Biodegradation* 18, 495–503. <https://doi.org/10.1007/s10532-006-9082-6>.
- Gaind, S., and Nain, L., 2010. Exploration of composted cereal waste and poultry manure for soil restoration. *Bioresource Technology* 101, 2996–3003. <https://doi.org/10.1016/j.biortech.2009.12.016>.
- Gaind, S., and Singh, Y.V., 2015a. Soil organic phosphorus fractions in response to long-term fertilization with composted manures under rice–wheat cropping system. *Journal of Plant Nutrition* 39, 1336–1347. <https://doi.org/10.1080/01904167.2015.1086795>.
- Gaind, S., and Nain, L., 2015b. Soil–Phosphorus Mobilization Potential of Phytate Mineralizing Fungi. *Journal of Plant Nutrition* 38, 2159–2175. <https://doi.org/10.1080/01904167.2015.1014561>.
- Gaind, S., and Singh, Y.V., 2016. Short-Term Impact of Organic Fertilization and Seasonal Variations on Enzymes and Microbial Indices Under Rice–Wheat Rotation. *Clean - Soil, Air, Water* 44, 1396–1404. <https://doi.org/10.1002/clen.201500946>.

- Gajda, A., and Martyniuk, S., 2005. Microbial biomass C and N and activity of enzymes in soil under winter wheat grown in different crop management systems. *Polish Journal of Environmental Studies* 14, 159–163.
- Gajda, A.M., Przewłoka, B., 2012. Soil biological activity as affected by tillage intensity. *International Agrophysics* 26, 15–23. <https://doi.org/10.2478/v10247-012-0003-0>.
- Galindo, F.S., Delate, K., Heins, B., Phillips, H., Smith, A., Pagliari, P.H., 2020. Cropping system and rotational grazing effects on soil fertility and enzymatic activity in an integrated organic crop-livestock system. *Agronomy* 10, 1–18. <https://doi.org/10.3390/agronomy10060803>.
- Galvez, A., Sinicco, T., Cayuela, M.L., Mingorance, M.D., Fornasier, F., Mondini, C., 2012. Short term effects of bioenergy by-products on soil C and N dynamics, nutrient availability and biochemical properties. *Agriculture, Ecosystems and Environment* 160, 3–14. <https://doi.org/10.1016/j.agee.2011.06.015>.
- Gangwar, R.K., Makadi, M., Demeter, I., Tancsics, A., Cserhati, M., Varbiro, G., Singh, J., Csorba, A., Fuchs, M., Micheli, E., Szegi, T., 2021. Comparing Soil Chemical and Biological Properties of Salt Affected Soils under Different Land Use Practices in Hungary and India. *EURASIAN SOIL SCIENCE* 54, 1007–1018. <https://doi.org/10.1134/S1064229321070048>.
- Gao, X., Shi, D., Lv, A., Wang, S., Yuan, S., Zhou, P., An, Y., 2016. Increase phosphorus availability from the use of alfalfa (*Medicago sativa* L) green manure in rice (*Oryza sativa* L.) agroecosystem. *Scientific Reports* 6, 1–13. <https://doi.org/10.1038/srep36981>.
- García-Martínez, A.M., Tejada, M., Díaz, A.I., Rodríguez-Morgado, B., Bautista, J., Parrado, J., 2010. Enzymatic vegetable organic extracts as soil biochemical biostimulants and atrazine extenders. *Journal of Agricultural and Food Chemistry* 58, 9697–9704. <https://doi.org/10.1021/jf101289n>.
- García-Orenes, F., Guerrero, C., Roldán, A., Mataix-Solera, J., Cerdà, A., Campoy, M., Zornoza, R., Bárcenas, G., Caravaca, F., 2010. Soil microbial biomass and activity under different agricultural management systems in a semiarid Mediterranean agroecosystem. *Soil and Tillage Research* 109, 110–115. <https://doi.org/10.1016/j.still.2010.05.005>.
- García-Orenes, F., Caravaca, F., Morugán-Coronado, A., Roldán, A., 2015. Prolonged irrigation with municipal wastewater promotes a persistent and active soil microbial community in a semiarid agroecosystem. *Agricultural Water Management* 149, 115–122. <https://doi.org/10.1016/j.agwat.2014.10.030>.
- García-Ruiz, R., Ochoa, V., Viñegla, B., Hinojosa, M.B., Peña-Santiago, R., Liébanas, G., Linares, J.C., Carreira, J.A., 2009. Soil enzymes, nematode community and selected physico-chemical properties as soil quality indicators in organic and conventional olive oil farming: Influence of seasonality and site features. *Applied Soil Ecology* 41, 305–314. <https://doi.org/10.1016/j.apsoil.2008.12.004>.
- García-Ruiz, R., Ochoa, V., Hinojosa, M.B., Carreira, J.A., 2008. Suitability of enzyme activities for the monitoring of soil quality improvement in organic agricultural systems. *Soil Biology and Biochemistry* 40, 2137–2145. <https://doi.org/10.1016/j.soilbio.2008.03.023>.



- García-Ruiz, R; Ochoa, M V; Hinojosa, M B; Gómez-Muñoz, B., 2012. Improved soil quality after 16 years of olive mill pomace application in olive oil groves. *Agronomy for Sustainable Development*, 32:803–810. <https://doi.org/10.1007/s13593-011-0080-7>.
- Garcia, C., Roldan, A., Hernandez, T., 1997. Changes in Microbial Activity after Abandonment of Cultivation in a Semiarid Mediterranean Environment. *Journal of Environmental Quality* 26, 285–292. <https://doi.org/10.2134/jeq1997.00472425002600010040x>.
- Garcia, C., and Hernandez, T., 1996. Influence of salinity on the biological and biochemical activity of a calciorthic soil. *Plant and Soil* 178, 255–263. <https://doi.org/10.1007/bf00011591>.
- Garg, N., and Cheema, A., 2021. Relative roles of Arbuscular Mycorrhizae in establishing a correlation between soil properties, carbohydrate utilization and yield in *Cicer arietinum* L. under As stress. *Ecotoxicology and Environmental Safety* 207, 111196. <https://doi.org/10.1016/j.ecoenv.2020.111196>.
- Garg, S., Bahl, G.S., 2008. Phosphorus availability to maize as influenced by organic manures and fertilizer P associated phosphatase activity in soils. *Bioresource Technology* 99, 5773–5777. <https://doi.org/10.1016/j.biortech.2007.10.063>.
- Gelsomino, A., Azzellino, A., 2011. Multivariate analysis of soils: microbial biomass, metabolic activity, and bacterial-community structure and their relationships with soil depth and type. *Journal of Plant Nutrition and Soil Science* 174, 381–394. <https://doi.org/10.1002/jpln.200900267>.
- George, S., Wright, D.L., Marois, J.J., 2013. Impact of grazing on soil properties and cotton yield in an integrated crop-livestock system. *Soil and Tillage Research* 132, 47–55. <https://doi.org/10.1016/j.still.2013.05.004>.
- Ghiloufi, W., and Chaieb, M., 2021. Environmental factors controlling vegetation attributes, soil nutrients and hydrolases in South Mediterranean arid grasslands. *Ecological Engineering* 161, 106155. <https://doi.org/10.1016/j.ecoleng.2021.106155>.
- Ghosh, A., Kumar, S., Manna, M.C.C., Singh, A.K.A.K., Sharma, P., Sarkar, A., Saha, M., Bhattacharyya, R., Misra, S., Biswas, S.S.S., Biswas, D.R., Gautam, K., Kumar, R.V.V., Biswas, D.R., Gautam, K., Kumar, R.V.V., 2019. Long-term in situ moisture conservation in horti-pasture system improves biological health of degraded land. *Journal of Environmental Management* 248. <https://doi.org/10.1016/j.jenvman.2019.109339>.
- Gigliotti, G., Giusquiani, P.L., Businelli, D., 2001. A long-term chemical and infrared spectroscopy study on a soil amended with municipal sewage sludge. *Agronomie* 21, 169–178. <https://doi.org/10.1051/agro:2001115>.
- Gispert, M., Emran, M., Pardini, G., Doni, S., Ceccanti, B., 2013. The impact of land management and abandonment on soil enzymatic activity, glomalin content and aggregate stability. *Geoderma* 202–203, 51–61. <https://doi.org/10.1016/j.geoderma.2013.03.012>.
- Gong, X., Zhang, Z., Wang, H., 2021. Effects of *Gleditsia sinensis* pod powder, coconut shell biochar and rice husk biochar as additives on bacterial communities and compost quality during vermicomposting of pig manure and wheat straw. *Journal of*

Environmental Management 295, 113136.  
<https://doi.org/10.1016/j.jenvman.2021.113136>.

- Gonnety, J.T., Assemien, E.F.L., Guei, A.M., N'Dri, A.A., Djina, Y., Kone, A.W., Tondoh, J.E., 2012. Effect of land-use types on soil enzymatic activities and chemical properties in semi-deciduous forest areas of Central-West Cote d'Ivoire. *Biotechnologie Agronomie Societe Et Environnement* 16, 478–485.
- Gopinath, K.A., Saha, S., Mina, B.L., Pande, H., Kumar, N., Srivastva, A.K., Gupta, H.S., 2009. Yield potential of garden pea (*Pisum sativum* L.) varieties, and soil properties under organic and integrated nutrient management systems. *Archives of Agronomy and Soil Science* 55, 157–167. <https://doi.org/10.1080/03650340802382207>.
- Gospodarek, J., Rusin, M., Barczyk, G., Nadgórska-Socha, A., 2021. The effect of petroleum-derived substances and their bioremediation on soil enzymatic activity and soil invertebrates. *Agronomy* 11. <https://doi.org/10.3390/agronomy11010080>.
- Gou, X., Cai, Y., Wang, C., Li, B., Zhang, R., Zhang, Y., Tang, X., Chen, Q., Shen, J., Deng, J., Zhou, X., 2020. Effects of different long-term cropping systems on phoD-harboring bacterial community in red soils. *Journal of Soils and Sediments* 21, 376–387. <https://doi.org/10.1007/s11368-020-02749-2>.
- Goyal, S., Chander, K., Mundra, M.C., Kapoor, K.K., 1999. Influence of inorganic fertilizers and organic amendments on soil organic matter and soil microbial properties under tropical conditions. *Biology and Fertility of Soils* 29, 196–200. <https://doi.org/10.1007/s003740050544>.
- Graça, J., Daly, K., Bondi, G., Ikoyi, I., Crispie, F., Cabrera-Rubio, R., Cotter, P.D., Schmalenberger, A., 2021. Drainage class and soil phosphorus availability shape microbial communities in Irish grasslands. *European Journal of Soil Biology* 104, 103297. <https://doi.org/10.1016/j.ejsobi.2021.103297>.
- Green, V.S., Stott, D.E., Cruz, J.C., Curi, N., 2007. Tillage impacts on soil biological activity and aggregation in a Brazilian Cerrado Oxisol. *Soil and Tillage Research* 92, 114–121. <https://doi.org/10.1016/j.still.2006.01.004>.
- Guan, G., Tu, S.-X., Yang, J.-C., Zhang, J.-F., Yang, L., 2011. A Field Study on Effects of Nitrogen Fertilization Modes on Nutrient Uptake, Crop Yield and Soil Biological Properties in Rice-Wheat Rotation System. *Agricultural Sciences in China* 10, 1254–1261. [https://doi.org/10.1016/S1671-2927\(11\)60117-X](https://doi.org/10.1016/S1671-2927(11)60117-X).
- Guan, G., Tu, S., Li, H., Yang, J., Zhang, J., Wen, S., Yang, L., 2013. Phosphorus Fertilization Modes Affect Crop Yield, Nutrient Uptake, and Soil Biological Properties in the Rice-Wheat Cropping System. *Soil Science Society of America Journal* 77, 166–172. <https://doi.org/10.2136/sssaj2011.0324>.
- Gunes, A., Inal, A., Adak, M.S., Alpaslan, M., Bagci, E.G., Erol, T., Pilbeam, D.J., 2007. Mineral nutrition of wheat, chickpea and lentil as affected by mixed cropping and soil moisture. *Nutrient Cycling in Agroecosystems* 78, 83–96. <https://doi.org/10.1007/s10705-006-9075-1>.
- Guo, D., Ali, A., Zhang, Z., 2021. *Streptomyces pactum* and sulfur mediated the rhizosphere microhabitats of potherb mustard after a phytoextraction trial. *Environmental Pollution* 281, 116968. <https://doi.org/10.1016/j.envpol.2021.116968>.

- Guo, Y.J., Ni, Y., Han, J.G., 2009. The Influence of Land Use Change on Chemical and Biological Properties of Steppe Soils in Northern China. *Arid Land Research and Management* 23, 197–212. <https://doi.org/10.1080/15324980903028553>.
- Gupta, V.V.S.R., Lawrence, J.R., Germida, J.J., 1988. Impact of elemental sulfur fertilization on agricultural soils. I. Effects on microbial biomass and enzyme activities. *Canadian Journal of Soil Science* 68, 463–473. <https://doi.org/10.4141/cjss88-045>.
- Habig, J., and Swanepoel, C., 2015. Effects of conservation agriculture and fertilization on soil microbial diversity and activity. *Environments - MDPI* 2, 358–384. <https://doi.org/10.3390/environments2030358>.
- Habig, J., Labuschagne, J., Marais, M., Swart, A., Claassens, S., 2018. The effect of a medic-wheat rotational system and contrasting degrees of soil disturbance on nematode functional groups and soil microbial communities. *Agriculture, Ecosystems and Environment* 268, 103–114. <https://doi.org/10.1016/j.agee.2018.09.013>.
- Hai-Ming, T., Xiao-Ping, X., Wen-Guang, T., Ye-Chun, T., Ye-Chun, L., Ke, W., Guang-Li, Y., 2014 . Effects of Winter Cover Crops Residue Returning on Soil Enzyme Activities and Soil Microbial Community in Double-Cropping Rice Fields.. *PLOS ONE*, 9: e100443. <http://dx.doi.org/journal.pone.0100443>.
- Hashimoto, Y., Matsufuru, H., Takaoka, M., Tanida, H., Sato, T., 2009. Impacts of Chemical Amendment and Plant Growth on Lead Speciation and Enzyme Activities in a Shooting Range Soil: An X-ray Absorption Fine Structure Investigation. *Journal of Environmental Quality* 38, 1420–1428. <https://doi.org/10.2134/jeq2008.0427>.
- Hatti V., Ramachandrappa B.K., Mudalagiriappa, Sathish A., Thimmegowda M.N., 2018. Soil properties and productivity of rainfed finger millet under conservation tillage and nutrient management in Eastern dry zone of Karnataka. *Journal of Environmental Biology*, 19: 612-624. <http://doi.org/10.22438/jeb/39/5/MRN-724>.
- Haynes, R.J., and Williams, P.H., 1999. Influence of stock camping behaviour on the soil microbiological and biochemical properties of grazed pastoral soils. *Biology and Fertility of Soils* 28, 253–258. <https://doi.org/10.1007/s003740050490>.
- Hazarika, S., Parkinson, R., Bol, R., Dixon, L., Russell, P., Donovan, S., Allen, D., 2009. Effect of tillage system and straw management on organic matter dynamics. *Agronomy for Sustainable Development* 29, 525–533. <https://doi.org/10.1051/agro/2009024>.
- Hazarika, S., Sohliya, B., Thakuria, D., Katak, S., Rangappa, K., 2021. Influence of organic amendments on acidic soil responsive crop groundnut (*Arachis hypogaea* L.). *Environmental Progress and Sustainable Energy* 40. <https://doi.org/10.1002/ep.13592>
- Hazra, K.K., Swain, D.K., Singh, S.S., 2021. The potential of crop residue recycling for sustainable phosphorus management in non-flooded rice-lentil system in alkaline soil. *Soil and Tillage Research* 213, 105147. <https://doi.org/10.1016/j.still.2021.105147>.
- He, Z., Honeycutt, C.W., Griffin, T.S., Larkin, R.P., Olanya, M., Halloran, J.M., 2010. Increases of soil phosphatase and urease activities in potato fields by cropping rotation practices. *Journal of Food, Agriculture and Environment* 8, 1112–1117.
- Hernández-Vigoa, G., Cabrera-Dávila, G. de la C., Izquierdo-Brito, I., Socarrás-Rivero, A.A., Hernández-Martínez, L., Sánchez-Rendón, J.A., 2018. Edaphic indicators after

the conversion of a grassland area into agroecological systems. *Pastos y Forrajes* 41, 3–12.

Hojati, S., and Nourbakhsh, F., 2006. Enzyme activities and microbial biomass carbon in a soil amended with organic and inorganic fertilizers. *Journal of Agronomy*, 5, 563–579. <http://dx.doi.org/10.3923/ja.2006.563.569>.

Hoyle, F.C., and Murphy, D.V., 2006. Seasonal changes in microbial function and diversity associated with stubble retention versus burning. *Australian Journal of Soil Research* 44, 407–423. <https://doi.org/10.1071/SR05183>.

Hu, J., Lin, X., Wang, J., Dai, J., Cui, X., Chen, R., Zhang, J., 2009. Arbuscular mycorrhizal fungus enhances crop yield and P-uptake of maize (*Zea mays* L.): A field case study on a sandy loam soil as affected by long-term P-deficiency fertilization. *Soil Biology and Biochemistry* 41, 2460–2465. <https://doi.org/10.1016/j.soilbio.2009.09.002>.

Hu, J., Cui, X., Wang, J., Lin, X., 2019a. The non-simultaneous enhancement of phosphorus acquisition and mobilization respond to enhanced arbuscular mycorrhization on Maize (*Zea mays* L.). *Microorganisms* 7, 1–13. <https://doi.org/10.3390/microorganisms7120651>.

Hu, J., Li, M., Liu, H., Zhao, Q., Lin, X., 2019b. Intercropping with sweet corn (*Zea mays* L. var. *rugosa* Bonaf.) expands P acquisition channels of chili pepper (*Capsicum annuum* L.) via arbuscular mycorrhizal hyphal networks. *Journal of Soils and Sediments* 19, 1632–1639. <https://doi.org/10.1007/s11368-018-2198-6>.

Idris, I., and Yuliar, Y., 2021. Potential application of *Bacillus amyloliquefaciens* EB13 inoculant for improving soil fertility and *Citrus sinensis* growth. *Asian Journal of Agriculture and Biology* 2022, 1–7. <https://doi.org/10.35495/AJAB.2021.02.069>.

Inal, A., Gunes, A., Zhang, F., Cakmak, I., 2007. Peanut/maize intercropping induced changes in rhizosphere and nutrient concentrations in shoots. *Plant Physiology and Biochemistry* 45, 350–356. <https://doi.org/10.1016/j.plaphy.2007.03.016>.

Izaguirre-Mayoral, M.L., Carballo, O., Carreño, L., Mejia, M.G.D., 2000. Effects of arbuscular mycorrhizal inoculation on growth, yield, nitrogen, and phosphorus nutrition of nodulating bean varieties in two soil substrates of contrasting fertility. *Journal of Plant Nutrition* 23, 1117–1133. <https://doi.org/10.1080/01904160009382086>.

Izquierdo, I., Caravaca, F., Alguacil, M.M., Roldán, A., 2003. Changes in physical and biological soil quality indicators in a tropical crop system (Havana, Cuba) in response to different agroecological management practices. *Environmental Management*, 32, 639–645. <http://dx.doi.org/10.1007/s00267-003-3034-2>.

Jabborova, D., Annapurna, K., Al-Sadi, A.M., Alharbi, S.A., Datta, R., Zuan, A.T.K., 2021. Biochar and Arbuscular mycorrhizal fungi mediated enhanced drought tolerance in Okra (*Abelmoschus esculentus*) plant growth, root morphological traits and physiological properties. *Saudi Journal of Biological Sciences* 28, 5490–5499. <https://doi.org/10.1016/j.sjbs.2021.08.016>.

Jain, N.K., Jat, R.A., Yadav, R.S., Bhaduri, D., Meena, H.N., 2018. Polythene mulching and fertigation in peanut (*Arachis hypogaea*): Effect on crop productivity, quality,

water productivity and economic profitability. *Indian Journal of Agricultural Sciences* 88, 1168–1178.

- Janaki, P., Alagesan, A., Ejilane, J., Nithila, S., Balasubramaniam, P., Santhy, P., 2021. Effect of soil and crop management practices on sodicity stress alleviation and rice productivity under water scarce condition. *Journal of Applied and Natural Science* 13, 1238–1248. <https://doi.org/10.31018/jans.v13i4.2930>.
- Janes-Bassett, V., Blackwell, M.S.A., Blair, G., Davies, J., Haygarth, P.M., Mezeli, M.M., Stewart, G., 2022. A meta-analysis of phosphatase activity in agricultural settings in response to phosphorus deficiency. *Soil Biology and Biochemistry* 165, 108537. <https://doi.org/10.1016/j.soilbio.2021.108537>.
- Jaskulska R. 2020a. The Level of Luvisols Biochemical Activity in Midfield Shelterbelt and Winter Triticale (xTriticosecale Wittm. ex A. Camus) Cultivation. *Agronomy*, 10: 1644. <https://doi.org/10.3390/agronomy10111644>.
- Jaskulska, I., Romanekas, K., Jaskulski, D., Gałęzewski, L., Breza-Boruta, B., Dębska, B., Lemanowicz, J., 2020. Soil properties after eight years of the use of strip-till one-pass technology. *Agronomy* 10, 1–16. <https://doi.org/10.3390/agronomy10101596>.
- Jat, H.S., Datta, A., Choudhary, M., Sharma, P.C., Yadav, A.K., Choudhary, V., Gathala, M.K., Jat, M.L., McDonald, A., 2019. Climate Smart Agriculture practices improve soil organic carbon pools, biological properties and crop productivity in cereal-based systems of North-West India. *Catena* 181, 104059. <https://doi.org/10.1016/j.catena.2019.05.005>.
- Jat, H.S., Choudhary, M., Datta, A., Yadav, A.K., Meena, M.D., Devi, R., Gathala, M.K., Jat, M.L., McDonald, A., Sharma, P.C., 2020. Temporal changes in soil microbial properties and nutrient dynamics under climate smart agriculture practices. *Soil and Tillage Research* 199, 104595. <https://doi.org/10.1016/j.still.2020.104595>.
- Jia, Q., Kamran, M., Ali, S., Sun, L., Zhang, P., Ren, X., Jia, Z., 2018. Deficit irrigation and fertilization strategies to improve soil quality and alfalfa yield in arid and semi-arid areas of northern China. *PeerJ* 2018, 1–21. <https://doi.org/10.7717/peerj.4410>.
- Jian, S., Li, J., Chen, J., Wang, G., Mayes, M.A., Dzantor, K.E., Hui, D., Luo, Y., 2016. Soil extracellular enzyme activities, soil carbon and nitrogen storage under nitrogen fertilization: A meta-analysis. *Soil Biology and Biochemistry* 101, 32–43. <https://doi.org/10.1016/j.soilbio.2016.07.003>.
- Jiang, Y., Arafat, Y., Letuma, P., Ali, L., Tayyab, M., Waqas, M., Li, Y., Lin, Weiwei, Lin, S., Lin, Wenxiong, 2019. Restoration of long-term monoculture degraded tea orchard by green and goat manures applications system. *Sustainability (Switzerland)* 11. <https://doi.org/10.3390/su11041011>.
- Johnson, D., Leake, J.R., Lee, J.A., Campbell, C.D., 1998. Changes in soil microbial biomass and microbial activities in response to 7 years simulated pollutant nitrogen deposition on a heathland and two grasslands. *Environmental Pollution* 103, 239–250. [https://doi.org/10.1016/S0269-7491\(98\)00115-8](https://doi.org/10.1016/S0269-7491(98)00115-8).
- Joshi, E., Vyas, A.K., Dhar, S., Dass, A., Sasode, D.S., Prajapati, K., Jinger, D., Singhal, V., Gupta, G., Prasad, D., 2021. Soil microbial biomass carbon and soil enzymatic activity under nutrient omission plot technique in maize (*Zea mays*)–wheat (*triticum aestivum*) cropping system. *Indian Journal of Agronomy* 66, 170–179.

- Juma, N.G., and Tabatabai, M.A., 1988. Comparison of kinetic and thermodynamic parameters of phosphomonoesterases of soils and of corn and soybean roots. *Soil Biology and Biochemistry* 20, 533–539. [https://doi.org/10.1016/0038-0717\(88\)90069-7](https://doi.org/10.1016/0038-0717(88)90069-7).
- Damian, J.M., da Silva Matos, E., e Pedreira, B.C., de Faccio Carvalho, P.C., de Souza, A.J., Andreote, F.D., Premazzi, L.M., Cerri, C.E.P., 2021. Pastureland intensification and diversification in Brazil mediate soil bacterial community structure changes and soil C accumulation. *Applied Soil Ecology* 160, 103858. <https://doi.org/10.1016/j.apsoil.2020.103858>.
- Kahle, P., Baum, C., Boelcke, B., Kohl, J., Ulrich, R., 2010. Vertical distribution of soil properties under short-rotation forestry in Northern Germany. *Journal of Plant Nutrition and Soil Science* 173, 737–746. <https://doi.org/10.1002/jpln.200900230>.
- Kamh, M., Horst, W.J., Amer, F., Mostafa, H., Maier, P., 1999. Mobilization of soil and fertilizer phosphate by cover crops. *Plant and Soil* 211, 19–27. <https://doi.org/10.1023/A:1004543716488>.
- Katsalirou, E., Deng, S., Gerakis, A., Nofziger, D.L., 2016. Long-term management effects on soil P, microbial biomass P, and phosphatase activities in prairie soils. *European Journal of Soil Biology* 76, 61–69. <https://doi.org/10.1016/j.ejsobi.2016.07.001>.
- Kaur, H., Gosal, S.K., Walia, S.S., 2017. Synergistic effect of organic, inorganic and biofertilizers on soil microbial activities in rhizospheric soil of green pea. *Annual Research and Review in Biology* 12, 1–11. <https://doi.org/10.9734/ARRB/2017/32509>.
- Kayikcioglu, H.H., 2018. Can treated wastewater be used as an alternative water resource for agricultural irrigation? Changes in soil and plant health after three years of maize cultivation in western anatolia, Turkey. *Applied Ecology and Environmental Research* 16, 8131–8161. [https://doi.org/10.15666/aeer/1606\\_81318161](https://doi.org/10.15666/aeer/1606_81318161).
- Rajeela, T.H.K., Gopal, M., Gupta, A., Bhat, R., Thomas, G.V., 2017. Cross-compatibility evaluation of plant growth promoting rhizobacteria of coconut and cocoa on yield and rhizosphere properties of vegetable crops. *Biocatalysis and Agricultural Biotechnology* 9, 67–73. <https://doi.org/10.1016/j.bcab.2016.11.006>.
- Khan, M.N., Huang, J., shah, A., Li, D., Daba, N.A., Han, T., Du, J., Qaswar, M., Anthonio, C.K., Sial, T.A., Haseeb, A., Zhang, L., Xu, Y., He, Z., Zhang, H., Núñez-Delgado, A., 2022. Mitigation of greenhouse gas emissions from a red acidic soil by using magnesium-modified wheat straw biochar. *Environmental Research* 203. <https://doi.org/10.1016/j.envres.2021.111879>.
- Khandare, R.N., Chandra, R., Pareek, N., Raverkar, K.P., 2020. Carrier-based and liquid bioinoculants of Azotobacter and PSB saved chemical fertilizers in wheat (*Triticum aestivum* L.) and enhanced soil biological properties in Mollisols. *Journal of Plant Nutrition* 43, 36–50. <https://doi.org/10.1080/01904167.2019.1659333>.
- Kharia, S., Thind, H., Sharma, S., Sidhu, H., Jat, M., Singh, Y., 2017. Tillage and Rice Straw Management Affect Soil Enzyme Activities and Chemical Properties after Three Years of Conservation Agriculture Based Rice-wheat System in North-Western India. *International Journal of Plant & Soil Science* 15, 1–13. <https://doi.org/10.9734/ijpss/2017/33494>.

- Khuong, N.Q., Kantachote, D., Onthong, J., Xuan, L.N.T., Sukhoom, A., 2018. Enhancement of rice growth and yield in actual acid sulfate soils by potent acid-resistant *Rhodopseudomonas palustris* strains for producing safe rice. *Plant and Soil* 429, 483–501. <https://doi.org/10.1007/s11104-018-3705-7>.
- Kim, K.Y., Cho, Y.S., Sohn, B.K., Park, R.D., Shim, J.H., Jung, S.J., Kim, Y.W., Seong, K.Y., 2002. Cold-storage of mixed inoculum of *Glomus intraradices* enhances root colonization, phosphorus status and growth of hot pepper. *Plant and Soil* 238, 267–272. <https://doi.org/10.1023/A:1014474617170>.
- Kobierski, M., and Lemanowicz, J., 2016. Activity of phosphomonoesterases and the content of phosphorus in the eroded Luvisols of orchard and arable soils. *Scientific Review Engineering and Environmental Sciences* 25, 323–332.
- Kobierski, M., Bartkowiak, A., Lemanowicz, J., Piekarczyk, M., 2017. Impact of poultry manure fertilization on chemical and biochemical properties of soils. *Plant, Soil and Environment* 63, 558–563. <https://doi.org/10.17221/668/2017-PSE>.
- Koczorski, P., Furtado, B., Hryniewicz, K., Breezmann, M., Weih, M., Baum, C., 2021. Site-effects dominate the plant availability of nutrients under salix species during the first cutting cycle. *Forests* 12. <https://doi.org/10.3390/f12091226>.
- Kohler, J., Caravaca, F., Carrasco, L., Roldán, A., 2007. Interactions between a plant growth-promoting rhizobacterium, an AM fungus and a phosphate-solubilising fungus in the rhizosphere of *Lactuca sativa*. *Applied Soil Ecology* 35, 480–487. <https://doi.org/10.1016/j.apsoil.2006.10.006>.
- Kohler, J., Tortosa, G., Cegarra, J., Caravaca, F., Roldán, A., 2008. Impact of DOM from composted “alperujo” on soil structure, AM fungi, microbial activity and growth of *Medicago sativa*. *Waste Management* 28, 1423–1431. <https://doi.org/10.1016/j.wasman.2007.05.008>.
- Kooch, Y., Ehsani, S., Akbarinia, M., 2019. Stoichiometry of microbial indicators shows clearly more soil responses to land cover changes than absolute microbial activities. *Ecological Engineering* 131, 99–106. <https://doi.org/10.1016/j.ecoleng.2019.03.009>.
- Koper, J., and Lemanowicz, J., 2008. Effect of varied mineral nitrogen fertilization on changes in the content of phosphorus in soil and in plant and the activity of soil phosphatases. *Ecol. Chem. Eng. S* 15, 465–471.
- Kowalska, J., Niewiadomska, A., Głuchowska, K., Kaczmarek, D., 2017. Impact of fertilizers on soil properties in the case of *solanum tuberosum* L. During conversion to organic farming. *Applied Ecology and Environmental Research* 15, 369–383. [https://doi.org/10.15666/aeer/1504\\_369383](https://doi.org/10.15666/aeer/1504_369383).
- Kremer, R.J., and Li, J., 2003. Developing weed-suppressive soils through improved soil quality management. *Soil and Tillage Research* 72, 193–202. [https://doi.org/10.1016/S0167-1987\(03\)00088-6](https://doi.org/10.1016/S0167-1987(03)00088-6).
- Krey, T., Caus, M., Baum, C., Ruppel, S., Eichler-Löbermann, B., 2011. Interactive effects of plant growth-promoting rhizobacteria and organic fertilization on P nutrition of *Zea mays* L. and *Brassica napus* L. *Journal of Plant Nutrition and Soil Science* 174, 602–613. <https://doi.org/10.1002/jpln.200900349>.

- Kumar, B., Dhar, S., Paul, S., Paramesh, V., Dass, A., Upadhyay, P.K., Kumar, A., Abdelmohsen, S.A.M., Alkallas, F.H., El-Abedin, T.K.Z., Elansary, H.O., Abdelbacki, A.M.M., 2021a. Microbial biomass carbon, activity of soil enzymes, nutrient availability, root growth, and total biomass production in wheat cultivars under variable irrigation and nutrient management. *Agronomy* 11, 1–16. <https://doi.org/10.3390/agronomy11040669>.
- Kumar, G., Suman, A., Lal, S., Ram, R.A., Bhatt, P., Pandey, G., Chaudhary, P., Rajan, S., 2021b. Bacterial structure and dynamics in mango (*Mangifera indica*) orchards after long term organic and conventional treatments under subtropical ecosystem. *Scientific Reports* 11, 1–13. <https://doi.org/10.1038/s41598-021-00112-0>.
- Kumar, R., Shambhavi, S., Beura, K., Kumar, S., Singh, R.G., 2017. Soil microbial budgeting as influenced by contrasting tillage and crop diversification under rice based cropping systems in Inceptisol of Bihar. *Journal of Pure and Applied Microbiology* 11, 539–547. <https://doi.org/10.22207/JPAM.11.1.71>.
- Kunito, T., Saeki, K., Goto, S., Hayashi, H., Oyaizu, H., Matsumoto, S., 2001. Copper and zinc fractions affecting microorganisms in long-term sludge-amended soils. *Bioresource Technology* 79, 135–146. [https://doi.org/10.1016/S0960-8524\(01\)00047-5](https://doi.org/10.1016/S0960-8524(01)00047-5).
- Kuziemska, B., Wysokiński, A., Klej, P., 2020. Effect of different zinc doses and organic fertilization on soil's enzymatic activity. *Journal of Elementology* 25, 1089–1099. <https://doi.org/10.5601/jelem.2020.25.1.1927>.
- Lago, M. del C.F., Gallego, P.P., Briones, M.J.I., 2019. Intensive cultivation of kiwifruit alters the detrital foodweb and accelerates soil C and N losses. *Frontiers in Microbiology* 10, 1–10. <https://doi.org/10.3389/fmicb.2019.00686>.
- Lagomarsino, A., Moscatelli, M.C., Tizio, A.D., Mancinelli, R., Grego, S., Marinari, S., 2009. Soil biochemical indicators as a tool to assess the short-term impact of agricultural management on changes in organic C in a Mediterranean environment. *Ecological Indicators* 9, 518–527. <https://doi.org/10.1016/j.ecolind.2008.07.003>.
- Lakhdar, A., Scelza, R., Achiba, W.B., Scotti, R., Rao, M.A., Jedidi, N., Abdelly, C., Gianfreda, L., 2011. Effect of municipal solid waste compost and sewage sludge on enzymatic activities and wheat yield in a clayey-loamy soil. *Soil Science* 176, 15–21. <https://doi.org/10.1097/SS.0b013e3182028d8a>.
- Lal, K., Minhas, P.S., Yadav, R.K., 2015. Long-term impact of wastewater irrigation and nutrient rates II. Nutrient balance, nitrate leaching and soil properties under peri-urban cropping systems. *Agricultural Water Management*, 156, 110–117. <http://dx.doi.org/10.1016/j.agwat.2015.04.001>.
- Lalande, R., Gagnon, B., Simard, R.R., 2003. Papermill biosolid and hog manure compost affect short-term biological activity and crop yield of a sandy soil. *Canadian Journal of Soil Science* 83, 353–362. <https://doi.org/10.4141/S03-004>.
- Lalande, R., Gagnon, B., Royer, I., 2009. Impact of natural or industrial liming materials on soil properties and microbial activity. *Canadian Journal of Soil Science* 89, 209–222. <https://doi.org/10.4141/CJSS08015>.



- Langer, U., and Klimanek, E.M., 2006. Soil microbial diversity of four German long-term field experiments. *Archives of Agronomy and Soil Science* 52, 507–523. <https://doi.org/10.1080/03650340600915554>.
- Laxminarayana, K., 2017. Effect of Mycorrhiza, Organic Sources, Lime, Secondary and Micro-nutrients on Soil Microbial Activities and Yield Performance of Yam Bean (*Pachyrhizus erosus* L.) in Alfisols. *Communications in Soil Science and Plant Analysis* 48, 186–200. <https://doi.org/10.1080/00103624.2016.1254232>.
- Lebrun, J.D., Trinsoutrot-Gattin, I., Vincelas-Akpa, M., Bailleul, C., Brault, A., Mougin, C., Laval, K., 2012. Assessing impacts of copper on soil enzyme activities in regard to their natural spatiotemporal variation under long-term different land uses. *Soil Biology and Biochemistry* 49, 150–156. <https://doi.org/10.1016/j.soilbio.2012.02.027>.
- Leirós, M.C., Trasar-Cepeda, C., García-Fernández, F., Gil-Sotres, F., 1999. Defining the validity of a biochemical index of soil quality. *Biology and Fertility of Soils* 30, 140–146. <https://doi.org/10.1007/s003740050600>.
- Lemanowicz, J., Bartkowiak, A., Breza-Boruta, B., 2016. Changes in phosphorus content, phosphatase activity and some physicochemical and microbiological parameters of soil within the range of impact of illegal dumping sites in Bydgoszcz (Poland). *Environmental Earth Sciences* 75, 1–14. <https://doi.org/10.1007/s12665-015-5162-4>.
- Li, C.H., Ma, B.L., Zhang, T.Q., 2002. Soil bulk density effects on soil microbial populations and enzyme activities during the growth of maize (*Zea mays* L.) planted in large pots under field exposure. *Canadian Journal of Soil Science* 82, 147–154. <https://doi.org/10.4141/S01-026>.
- Li, Z., Jin, Z., Li, Q., 2017a. Changes in land use and their effects on soil properties in Huixian karst wetland system. *Polish Journal of Environmental Studies* 26, 699–707. <https://doi.org/10.15244/pjoes/65360>.
- Li, B., Chen, Y., Liang, W. zhen, Mu, L., Bridges, W.C., Jacobson, A.R., Darnault, C.J.G., 2017b. Influence of cerium oxide nanoparticles on the soil enzyme activities in a soil-grass microcosm system. *Geoderma* 299, 54–62. <https://doi.org/10.1016/j.geoderma.2017.03.027>.
- Li, C., Veum, K.S., Goyne, K.W., Nunes, M.R., Acosta-Martinez, V., 2021a. A chronosequence of soil health under tallgrass prairie reconstruction. *APPLIED SOIL ECOLOGY* 164. <https://doi.org/10.1016/j.apsoil.2021.103939>.
- Li, C., Hoffland, E., Werf, W. van der, Zhang, J., Li, H., Sun, J., Zhang, F., Kuyper, T.W., 2021b. Complementarity and facilitation with respect to P acquisition do not drive overyielding by intercropping. *FIELD CROPS RESEARCH* 265. <https://doi.org/10.1016/j.fcr.2021.108127>.
- Li, Q., Chen, J., Wu, L., Luo, X., Li, N., Arafat, Y., Lin, S., Lin, W., 2018a. Belowground interactions impact the soil bacterial community, soil fertility, and crop yield in maize/peanut intercropping systems. *International Journal of Molecular Sciences* 19. <https://doi.org/10.3390/ijms19020622>.
- Li, J., Liu, L., Zhang, C., Chen, C., Lu, G., Xiong, J., Yang, H., 2018b. Effects of crop type on soil microbial properties in the cropland of the jiangnan plain of China. *Plant, Soil and Environment* 64, 421–426. <https://doi.org/10.17221/283/2018-PSE>.

- Li, J., Xu, Y., 2018. Effects of clay combined with moisture management on Cd immobilization and fertility index of polluted rice field. *Ecotoxicology and Environmental Safety* 158, 182–186. <https://doi.org/10.1016/j.ecoenv.2018.04.031>.
- Li, Qiang, Hu, Q., Zhang, C., Jin, Z., 2018. Effects of Pb, Cd, Zn, and Cu on soil enzyme activity and soil properties related to agricultural land-use practices in karst area contaminated by Pb-Zn tailings. *Polish Journal of Environmental Studies* 27, 2623–2632. <https://doi.org/10.15244/pjoes/81213>.
- Li, X.H., Han, X.Z., Li, H.B., Song, C., Yan, J., Liang, Y., 2012. Soil chemical and biological properties affected by 21-year application of composted manure with chemical fertilizers in a Chinese mollisol. *Canadian Journal of Soil Science* 92, 419–428. <https://doi.org/10.4141/CJSS2010-046>.
- Li, Y.T., Rouland, C., Benedetti, M., Li, F. bai, Pando, A., Lavelle, P., Dai, J., 2009. Microbial biomass, enzyme and mineralization activity in relation to soil organic C, N and P turnover influenced by acid metal stress. *Soil Biology and Biochemistry* 41, 969–977. <https://doi.org/10.1016/j.soilbio.2009.01.021>.
- Liang, Z., and Elsgaard, L., 2021. Nitrous oxide fluxes from long-term limed soils following P and glucose addition: Nonlinear response to liming rates and interaction from added P. *Science of the Total Environment* 797, 148933. <https://doi.org/10.1016/j.scitotenv.2021.148933>.
- Lin, J., Ma, K., Chen, H., Chen, Z., Xing, B., 2021. Influence of different types of nanomaterials on soil enzyme activity: A global meta-analysis. *Nano Today* 42, 101345. <https://doi.org/10.1016/j.nantod.2021.101345>.
- Liu, C.-A., and Zhou, L.-M., 2017. Soil organic carbon sequestration and fertility response to newly-built terraces with organic manure and mineral fertilizer in a semi-arid environment. *Soil and Tillage Research* 172, 39–47. <https://doi.org/10.1016/j.still.2017.05.003>.
- Liu, E., Yan, C., Mei, X., He, W., Bing, S.H., Ding, L., Liu, Q., Liu, S., Fan, T., 2010. Long-term effect of chemical fertilizer, straw, and manure on soil chemical and biological properties in northwest China. *Geoderma* 158, 173–180. <https://doi.org/10.1016/j.geoderma.2010.04.029>.
- Liu, X. M., Li Q., Liang W.J., Jiang Y., 2008. Distribution of Soil Enzyme Activities and Microbial Biomass Along a Latitudinal Gradient in Farmlands of Songliao Plain, Northeast China1 1 Project Supported by the National Key Basic Research Support Foundation of China (No. 2005CB121105) and the Nation'. *Pedosphere* 18(4):431–40. doi: 10.1016/S1002-0160(08)60034-X.
- Liu, Y.M., Cao, W.Q., Chen, X.X., Yu, B.G., Lang, M., Chen, X.P., Zou, C.Q., 2020. The responses of soil enzyme activities, microbial biomass and microbial community structure to nine years of varied zinc application rates. *Science of the Total Environment* 737, 140245. <https://doi.org/10.1016/j.scitotenv.2020.140245>.
- Liu, Z., Bai, J., Qin, H., Sun, D., Li, M., Hu, J., Lin, X., 2021a. Application of rice straw and horse manure coameliorated soil arbuscular mycorrhizal fungal community: Impacts on structure and diversity in a degraded field in Eastern China. *Land Degradation and Development* 32, 2595–2605. <https://doi.org/10.1002/ldr.3927>.

- Liu, C., Wang, Q.W., Jin, Y., Tang, J., Lin, F., Olatunji, O.A., 2021b. Perennial cover crop biomass contributes to regulating soil P availability more than rhizosphere P-mobilizing capacity in rubber-based agroforestry systems. *Geoderma* 401, 115218. <https://doi.org/10.1016/j.geoderma.2021.115218>.
- Lo Presti, E., Badagliacca G., Romeo M., Monti M., 2021. Does Legume Root Exudation Facilitate Itself P Uptake in Intercropped Wheat?. *Journal of Soil Science and Plant Nutrition* 21(4):3269–83. doi: 10.1007/s42729-021-00605-x.
- Łukowski, A., and Dec, D., 2018. Influence of Zn, Cd, and Cu fractions on enzymatic activity of arable soils. *Environmental Monitoring and Assessment* 190. <https://doi.org/10.1007/s10661-018-6651-1>.
- Lungmuana, Singh, S.B., Choudhury, B.U., Vanthawmliana, Saha, S., Hnamte, V., 2019. Transforming jhum to plantations: Effect on soil microbiological and biochemical properties in the foot hills of North Eastern Himalayas, India. *Catena* 177, 84–91. <https://doi.org/10.1016/j.catena.2019.02.008>.
- Madejón, E., Moreno, F., Murillo, J.M., Pelegrín, F., 2007. Soil biochemical response to long-term conservation tillage under semi-arid Mediterranean conditions. *Soil and Tillage Research* 94, 346–352. <https://doi.org/10.1016/j.still.2006.08.010>.
- Madejón, E., Burgos, P., López, R., Cabrera, F., 2003. Agricultural Use of Three Organic Residues: Effect on Orange Production and on Properties of a Soil of the “Comarca Costa de Huelva” (SW Spain). *Nutrient Cycling in Agroecosystems* 65(3):281–88. doi: 10.1023/A:1022608828694.
- Madhaiyan, M., Poonguzhali, S., Kang, B.G., Lee, Y.J., Chung, J.B., Sa, T.M., 2010. Effect of co-inoculation of methylotrophic *Methylobacterium oryzae* with *Azospirillum brasilense* and *Burkholderia pyrrocinia* on the growth and nutrient uptake of tomato, red pepper and rice. *Plant and Soil* 328, 71–82. <https://doi.org/10.1007/s11104-009-0083-1>.
- Mahajan, Gopal R., Manjunath, B.L., Morajkar, S., Desai, A., Das, B., Paramesh, V., 2021. Long-Term Effect of Various Organic and Inorganic Nutrient Sources on Rice Yield and Soil Quality in West Coast India Using Suitable Indexing Techniques. *Communications in Soil Science and Plant Analysis* 52, 1819–1833. <https://doi.org/10.1080/00103624.2021.1900221>.
- Mahapatra, B., Adak, T., Patil, N.K.B., G, G.P.P., Gowda, G.B., Jambhulkar, N.N., Yadav, M.K., Panneerselvam, P., Kumar, U., Munda, S., Jena, M., 2017. Imidacloprid application changes microbial dynamics and enzymes in rice soil. *Ecotoxicology and Environmental Safety* 144, 123–130. <https://doi.org/10.1016/j.ecoenv.2017.06.013>.
- Mahmood, M., Xu, T., Ahmed, W., Yang, J., Li, J., Mehmood, S., Liu, W., Weng, J., Li, W., 2022. Variability in Soil Parent Materials at Different Development Stages Controlled Phosphorus Fractions and Its Uptake by Maize Crop. *Sustainability* (Switzerland) 14. <https://doi.org/10.3390/su14095048>.
- Maini, A., Sharma, V., Sharma, S., 2022. Assessment of soil biochemical properties and soil quality index under rainfed land use systems in submontane Punjab, India. *Indian Journal of Biochemistry and Biophysics* 59, 357–367. <https://doi.org/10.56042/ijbb.v59i3.28641>.

- Majumdar, B., Saha, A.R., Sarkar, S., Maji, B., Mahapatra, B.S., 2010. Effect of herbicides and fungicides application on fibre yield and nutrient uptake by jute (*Corchorus olitorius*), residual nutrient status and soil quality. *Indian Journal of Agricultural Sciences* 80, 878–883.
- Makoi, J.H.J.R., Bambara, S., Ndakidemi, P.A., 2010. Rhizosphere phosphatase enzyme activities and secondary metabolites in plants as affected by the supply of Rhizobium, lime and molybdenum in *Phaseolus vulgaris* L. *Australian Journal of Crop Science* 4, 590–597.
- Malobane, M.E., Nciizah, A.D., Nyambo, P., Mudau, F.N., Wakindiki, I.I.C., 2020. Microbial biomass carbon and enzyme activities as influenced by tillage, crop rotation and residue management in a sweet sorghum cropping system in marginal soils of South Africa. *Heliyon* 6, e05513. <https://doi.org/10.1016/j.heliyon.2020.e05513>.
- Mandal, A., Patra, A.K., Singh, D., Swarup, A., Masto, R.E., 2007. Effect of long-term application of manure and fertilizer on biological and biochemical activities in soil during crop development stages. *Bioresource Technology* 98, 3585–3592. <https://doi.org/10.1016/j.biortech.2006.11.027>.
- Mandal, A., Thakur, J.K., Sahu, A., Manna, M.C., Rao, A.S., Sarkar, B., Patra, A.K., 2018. Effects of Bt-cotton on biological properties of Vertisols in central India. *Archives of Agronomy and Soil Science* 65, 670–685. <https://doi.org/10.1080/03650340.2018.1520978>.
- Mandal, N., Datta, S.C., Dwivedi, B.S., Manjaiah, K.M., Meena, M.C., Bhowmik, A., 2021. Zincated Nanoclay Polymer Composite (ZNCPC): Effect on DTPA-Zn, Olsen-P and Soil Enzymatic Activities in Rice Rhizosphere. *Communications in Soil Science and Plant Analysis* 52, 2032–2044. <https://doi.org/10.1080/00103624.2021.1908325>.
- Mani, S., Avudainayagam S., Boomiraj K., Sethupathi N., 2020. Effect of Nutrient Management on  $\delta^{15}\text{N}$ ,  $\delta^{13}\text{C}$  Isotopes and Enzyme Activities in Higher Altitude Agricultural Soils, India. *Geomicrobiology Journal* 38(2):174–80. doi: 10.1080/01490451.2020.1822469.
- Manjunath, M., Kanchan, A., Ranjan, K., Venkatachalam, S., Prasanna, R., Ramakrishnan, B., Hossain, F., Nain, L., Shivay, Y.S., Rai, A.B., Singh, B., 2016. Beneficial cyanobacteria and eubacteria synergistically enhance bioavailability of soil nutrients and yield of okra. *Heliyon* 2. <https://doi.org/10.1016/j.heliyon.2016.e00066>.
- Mankolo, R.N., Senwo, Z.N., Ranatunga, T.D., Tazisong, I.A., 2006. Phosphorus partitioning and phosphatase activity along topographic gradients of an agricultural watershed cropped with corn and soybean. *Journal of Sustainable Agriculture* 28, 131–143. [https://doi.org/10.1300/J064v28n02\\_10](https://doi.org/10.1300/J064v28n02_10).
- Manna, M.C., Rao, A.S., Ganguly, T.K., 2007. Effect of fertilizer P and farmyard manure on bioavailable P as influenced by rhizosphere microbial activities in soybean-wheat rotation. *Journal of Sustainable Agriculture* 29, 149–166. [https://doi.org/10.1300/J064v29n03\\_12](https://doi.org/10.1300/J064v29n03_12).
- Manna, M.C., Swarup, A., Wanjari, R.H., Ravankar, H.N., Mishra, B., Saha, M.N., Singh, Y.V., Sahi, D.K., Sarap, P.A., 2005. Long-term effect of fertilizer and manure application on soil organic carbon storage, soil quality and yield sustainability under sub-humid and semi-arid tropical India. *Field Crops Research* 93, 264–280. <https://doi.org/10.1016/j.fcr.2004.10.006>.

- Margalef, O., Sardans, J., Fernández-Martínez, M., Molowny-Horas, R., Janssens, I.A., Ciais, P., Goll, D., Richter, A., Obersteiner, M., Asensio, D., Peñuelas, J., 2017. Global patterns of phosphatase activity in natural soils. *Scientific Reports* 7, 1337. <https://doi.org/10.1038/s41598-017-01418-8>.
- Margalef, O., Sardans, J., Maspons, J., Molowny-Horas, R., Fernández-Martínez, M., Janssens, I.A., Richter, A., Ciais, P., Obersteiner, M., Peñuelas, J., 2021. The effect of global change on soil phosphatase activity. *Global Change Biology* 27, 5989–6003. <https://doi.org/10.1111/gcb.15832>.
- Marklein, A.R., and Houlton, B.Z., 2012. Nitrogen inputs accelerate phosphorus cycling rates across a wide variety of terrestrial ecosystems. *New Phytologist* 193, 696–704. <https://doi.org/10.1111/j.1469-8137.2011.03967.x>.
- Martínez, M.M., Ortega, R., Janssens, M., Fincheira, P., 2018. Use of organic amendments in table grape: Effect on plant root system and soil quality indicators. *Journal of Soil Science and Plant Nutrition* 18, 100–112. <https://doi.org/10.4067/S0718-95162018005000501>.
- Martins Sousa, H., Ribeiro Correa A., de Motta Silva B., da Silva Oliveira S., da Silva Campos D.T., Wruck F.J., 2020. Dynamics of soil microbiological attributes in integrated crop-livestock systems in the cerrado-amazonônia ecotone. *Revista Caatinga* 33(1):9–20. doi: 10.1590/1983-21252020v33n102rc.
- Martyniuk, S., Piłkuła, D., Kozieł, M., 2019. Soil properties and productivity in two long-term crop rotations differing with respect to organic matter management on an Albic Luvisol. *Scientific Reports* 9, 1–9. <https://doi.org/10.1038/s41598-018-37087-4>.
- Masto, R.E., Chhonkar, P.K., Singh, D., Patra, A.K., 2006. Changes in soil biological and biochemical characteristics in a long-term field trial on a sub-tropical inceptisol. *Soil Biology and Biochemistry* 38, 1577–1582. <https://doi.org/10.1016/j.soilbio.2005.11.012>.
- Masto, R.E., Chhonkar, P.K., Singh, D., Patra, A.K., 2008. Changes in soil quality indicators under long-term sewage irrigation in a sub-tropical environment. *Environmental Geology* 56, 1237–1243. <https://doi.org/10.1007/s00254-008-1223-2>.
- Masto, R.E., Ansari, M.A., George, J., Selvi, V.A., Ram, L.C., 2013. Co-application of biochar and lignite fly ash on soil nutrients and biological parameters at different crop growth stages of *Zea mays*. *Ecological Engineering* 58, 314–322. <https://doi.org/10.1016/j.ecoleng.2013.07.011>.
- Mazzuchelli, R. de C.L., Araujo, A.S.F. de, Moro, E., Araujo, F.F. de, 2020. Changes in Soil Properties and Crop Yield as a Function of Early Desiccation of Pastures. *Journal of Soil Science and Plant Nutrition* 20, 840–848. <https://doi.org/10.1007/s42729-019-00169-x>.
- Mbarki, S., Labidi, N., Talbi, O., Jdidi, N., Abdelly, C., Pascual, J.A., 2010. Ameliorative Effect of Municipal Solid Waste Compost on the Biological Quality Of Mediterranean Salt Lake Soil. *Compost Science and Utilization* 18, 242–248. <https://doi.org/10.1080/1065657X.2010.10736962>.
- McCallister, D.L., Bahadir, M.A., Blumenthal, J.M., 2002. Phosphorus partitioning and phosphatase activity in semi-arid region soils under increasing crop growth intensity. *Soil Science* 167, 616–624. <https://doi.org/10.1097/00010694-200209000-00006>.

- Meena, H.M., Prakasha, H.C., 2021. The impact of biochar, lime and fertilizer on soil acidity and microbiological properties and their relationship with yield of rice and cowpea in an acidic soil of Southern India. *Journal of Plant Nutrition* 45, 358–368. <https://doi.org/10.1080/01904167.2021.1952225>.
- Meena, M.D., Joshi, P.K., Jat, H.S., Chinchmalatpure, A.R., Narjary, B., Sheoran, P., Sharma, D.K., 2016. Changes in biological and chemical properties of saline soil amended with municipal solid waste compost and chemical fertilizers in a mustard-pearl millet cropping system. *Catena* 140, 1–8. <https://doi.org/10.1016/j.catena.2016.01.009>.
- Meena, M.D., Narjary, B., Sheoran, P., Jat, H.S., Joshi, P.K., Chinchmalatpure, A.R., Yadav, G., Yadav, R.K., Meena, M.K., 2018. Changes of phosphorus fractions in saline soil amended with municipal solid waste compost and mineral fertilizers in a mustard-pearl millet cropping system. *Catena* 160, 32–40. <https://doi.org/10.1016/j.catena.2017.09.002>.
- Megharaj, M., Singleton, I., Kookana, R., Naidu, R., 1999. Persistence and effects of fenamiphos on native algal populations and enzymatic activities in soil. *Soil Biology and Biochemistry* 31, 1549–1553. [https://doi.org/10.1016/S0038-0717\(99\)00078-4](https://doi.org/10.1016/S0038-0717(99)00078-4).
- Meher, S., Saha, S., Tiwari, N., Panneerselvam, P., Munda, S., Mahapatra, A., Jangde, H.K., 2021. Herbicide-Mediated Effects on Soil Microbes, Enzymes and Yield in Direct Sown Rice. *Agricultural Research* 10, 592–600. <https://doi.org/10.1007/s40003-020-00536-6>
- Mejia Guerra P.A., Salas Sanjúan MdC., López M.J., 2018. Evaluation of physicochemical properties and enzymatic activity of organic substrates during four crop cycles in soilless containers.. *Food Science & Nutrition*, 6(8): 2066-2078. <https://doi.org/10.1002/fsn3.757>.
- Melero, S., Porras, J.C.R., Herencia, J.F., Madejon, E., 2006. Chemical and biochemical properties in a silty loam soil under conventional and organic management. *Soil and Tillage Research* 90, 162–170. <https://doi.org/10.1016/j.still.2005.08.016>.
- Melero, S., Madejón, E., Herencia, J.F., Ruiz, J.C., 2007a. Biochemical properties of two different textured soils (loam and clay) after the addition of two different composts during conversion to organic farming. *Spanish Journal of Agricultural Research* 5, 593–604. <https://doi.org/10.5424/sjar/2007054-281>.
- Melero, S., Madejón, E., Ruiz, J.C., Herencia, J.F., 2007b. Chemical and biochemical properties of a clay soil under dryland agriculture system as affected by organic fertilization. *European Journal of Agronomy* 26, 327–334. <https://doi.org/10.1016/j.eja.2006.11.004>.
- Melero, S., Vanderlinden, K., Ruiz, J.C., Madejon, E., 2008a. Long-term effect on soil biochemical status of a Vertisol under conservation tillage system in semi-arid Mediterranean conditions. *European Journal of Soil Biology* 44, 437–442. <https://doi.org/10.1016/j.ejsobi.2008.06.003>.
- Melero, S., Madejón, E., Herencia, J.F., Ruiz, J.C., 2008b. Effect of implementing organic farming on chemical and biochemical properties of an irrigated loam soil. *Agronomy Journal* 100, 136–144. <https://doi.org/10.2134/agronj2007.0087>.

- Melero Sanchez, S., Madejón, E., Herencia, J. F., Porras, J. C. R., 2008. Long-term study of properties of a xerofluent of the Guadalquivir River Valley under organic fertilization. *Agronomy journal*, 100 (3): 611-618. <https://doi.org/10.2134/agronj2006.0317>.
- Melero, S., Vanderlinden, K., Ruiz, J.C., Madejn, E., 2009. Soil biochemical response after 23 years of direct drilling under a dryland agriculture system in southwest Spain. *Journal of Agricultural Science* 147, 9–15. <https://doi.org/10.1017/S0021859608008204>.
- Melero, S., López-Bellido, R.J., López-Bellido, L., Muñoz-Romero, V., Moreno, F., Murillo, J.M., 2011. Long-term effect of tillage, rotation and nitrogen fertiliser on soil quality in a Mediterranean Vertisol. *Soil and Tillage Research* 114, 97–107. <https://doi.org/10.1016/j.still.2011.04.007>.
- Meli, S.M., Baglieri, A., Porto, M., Belligno, A., Gennari, M., 2007. Chemical and microbiological aspects of soil amended with citrus pulp. *Journal of Sustainable Agriculture* 30, 53–66. [https://doi.org/10.1300/J064v30n04\\_05](https://doi.org/10.1300/J064v30n04_05).
- Meli, S., Porto, M., Belligno, A., Bufo, S.A., Mazzatura, A., Scopa, A., 2002. Influence of irrigation with lagooned urban wastewater on chemical and microbiological soil parameters in a citrus orchard under Mediterranean condition. *Science of the Total Environment* 285, 69–77. [https://doi.org/10.1016/S0048-9697\(01\)00896-8](https://doi.org/10.1016/S0048-9697(01)00896-8).
- Meng, C., Tian, D., Zeng, H., Li, Z., Chen, H.Y.H., Niu, S., 2020. Global meta-analysis on the responses of soil extracellular enzyme activities to warming. *Science of the Total Environment* 705, 135992. <https://doi.org/10.1016/j.scitotenv.2019.135992>.
- Menge, D.N.L., and Field, C.B., 2007. Simulated global changes alter phosphorus demand in annual grassland. *Global Change Biology* 13, 2582–2591. <https://doi.org/10.1111/j.1365-2486.2007.01456.x>.
- Mercl, F., García-Sánchez, M., Kulhánek, M., Košnář, Z., Száková, J., Tlustoš, P., 2020. Improved phosphorus fertilisation efficiency of wood ash by fungal strains *Penicillium* sp. PK112 and *Trichoderma harzianum* OMG08 on acidic soil. *Applied Soil Ecology* 147. <https://doi.org/10.1016/j.apsoil.2019.09.010>.
- Meshram, N.A., Ismail, S., Patil, V.D., 2016. Long-term effect of organic manuring and inorganic fertilization on humus fractionation, microbial community and enzymes assay in vertisol. *Journal of Pure and Applied Microbiology* 10, 139–150.
- Miao, F., Li, Y., Cui, S., Jagadamma, S., Yang, G., Zhang, Q., 2019. Soil extracellular enzyme activities under long-term fertilization management in the croplands of China: a meta-analysis. *Nutr Cycl Agroecosyst* 114, 125–138. <https://doi.org/10.1007/s10705-019-09991-2>.
- Mina, B.L., Saha, S., Kumar, N., Srivastva, A.K., Gupta, H.S., 2008. Changes in soil nutrient content and enzymatic activity under conventional and zero-tillage practices in an Indian sandy clay loam soil. *Nutrient Cycling in Agroecosystems* 82, 273–281. <https://doi.org/10.1007/s10705-008-9189-8>.
- Moharana, P.C., Biswas, D.R., 2022. Phosphorus Delivery Potential in Soil Amended with Rock Phosphate Enriched Composts of Variable Crop Residues under Wheat–Green Gram Cropping Sequence. *Communications in Soil Science and Plant Analysis* 53, 1000–1017. <https://doi.org/10.1080/00103624.2022.2039175>.

- Monaci, E., Angeletti, C., Casucci, C., Vischetti, C., 2022. Nitrogen release from pelletized poultry fertilizer in two soils: influence of soil moisture and microbial biomass. *Revista Brasileira de Ciencia do Solo* 46, 1–13. <https://doi.org/10.36783/18069657rbc20210101>.
- Monkiedje, A., Spiteller, M., Fotio, D., Sukul, P., 2006. The Effect of Land Use on Soil Health Indicators in Peri-Urban Agriculture in the Humid Forest Zone of Southern Cameroon. *Journal of Environmental Quality* 35, 2402–2409. <https://doi.org/10.2134/jeq2005.0447>.
- Monokrousos, N., Papatheodorou, E.M., Diamantopoulos, J.D., Stamou, G.P., 2006. Soil quality variables in organically and conventionally cultivated field sites. *Soil Biology and Biochemistry* 38, 1282–1289. <https://doi.org/10.1016/j.soilbio.2005.09.023>.
- Moreira, R.S., Chiba, M.K., Nunes, S.B., Maria, I.C.D., 2017. Air-drying pretreatment effect on soil enzymatic activity. *Plant, Soil and Environment* 63, 29–33. <https://doi.org/10.17221/656/2016-PSE>.
- Moreno-Cornejo, J., Caballero-Lajarín, A., Faz, Á., Zornoza, R., 2017. Pepper crop residues and chemical fertilizers effect on soil fertility, yield and nutritional status in a crop of Brassica oleracea. *Journal of Soil Science and Plant Nutrition* 17, 648–661. <https://doi.org/10.4067/S0718-95162017000300008>.
- Moreno, J.L., García, C., Hernández, T., 1998. Changes in organic matter and enzymatic activity of an agricultural soil amended with metal-contaminated sewage sludge compost. *Communications in Soil Science and Plant Analysis* 29, 2247–2262. <https://doi.org/10.1080/00103629809370108>.
- Moro, H., Park, H.D., Kunito, T., 2021. Organic phosphorus substantially contributes to crop plant nutrition in soils with low phosphorus availability. *Agronomy* 11. <https://doi.org/10.3390/agronomy11050903>.
- Morugán-Coronado, A., García-Orenes, F., McMillan, M., Pereg, L., 2019. The effect of moisture on soil microbial properties and nitrogen cyclers in Mediterranean sweet orange orchards under organic and inorganic fertilization. *Science of the Total Environment* 655, 158–167. <https://doi.org/10.1016/j.scitotenv.2018.11.174>.
- Mullen, M.D., Melhorn, C.G., Tyler, D.D., Duck, B.N., 1998. Biological and biochemical soil properties in no-till corn with different cover crops. *Journal of Soil and Water Conservation* 53, 219–224.
- N'Dayegamiye, A., 2006. Mixed paper mill sludge effects on corn yield, nitrogen efficiency, and soil properties. *Agronomy Journal* 98, 1471–1478. <https://doi.org/10.2134/agronj2005.0339>.
- Nakas, J.P., Gould, W.D., Klein, D.A., 1987. Origin and expression of phosphatase activity in a semi-arid grassland soil. *Soil Biology and Biochemistry* 19, 13–18. [https://doi.org/10.1016/0038-0717\(87\)90118-0](https://doi.org/10.1016/0038-0717(87)90118-0).
- Naragund, R., Singh, Y.V., Jaiswal, P., Bana, R.S., Choudhary, A.K., 2020. Influence of Crop Establishment Practices and Microbial Inoculants on Nodulation of Summer Green Gram (*Vigna radiata*) and Soil Quality Parameters. *Legume Research* 45, 646–651. <https://doi.org/10.18805/LR-4246>.



- Nath, C.P., Das, T.K., Bhattacharyya, R., Pathak, H., Paul, S., Chakraborty, D., Hazra, K.K., 2017. Nitrogen Effects on Productivity and Soil Properties in Conventional and Zero Tilled Wheat with Different Residue Management. *Proceedings of the National Academy of Sciences India Section B - Biological Sciences* 89, 123–135. <https://doi.org/10.1007/s40011-017-0919-z>.
- Nath, C.P., Kumar, N., Das, K., Hazra, K.K., Praharaj, C.S., Singh, N.P., 2021. Impact of variable tillage based residue management and legume based cropping for seven years on enzymes activity, soil quality index and crop productivity in rice ecology. *Environmental and Sustainability Indicators* 10, 100107. <https://doi.org/10.1016/j.indic.2021.100107>.
- Nayyar, A., Hamel, C., Lafond, G., Gossen, B.D., Hanson, K., Germida, J., 2009. Soil microbial quality associated with yield reduction in continuous-pea. *Applied Soil Ecology* 43, 115–121. <https://doi.org/10.1016/j.apsoil.2009.06.008>.
- Neal, A.L., McLaren, T., Campolino, M.L., Hughes, D., Coelho, A.M., Lana, U.G.D.P., Gomes, E.A., Sousa, S.M.D., 2021. Crop type exerts greater influence upon rhizosphere phosphohydrolase gene abundance and phylogenetic diversity than phosphorus fertilization. *FEMS Microbiology Ecology* 97. <https://doi.org/10.1093/femsec/fiab033>.
- Nedunchezhiyan, M., Laxminarayana, K., Chauhan, V.B.S., 2018. Soil Microbial Activities and Yield of Elephant Foot Yam as Influenced by Weed Management Practices in Alfisols. *International Journal of Vegetable Science* 24, 583–596. <https://doi.org/10.1080/19315260.2018.1454567>.
- Nedyalkova, K., Donkova, R., Malinov, I., 2020. Acid phosphatase activity under the impact of erosion level in agricultural soils of different type and land use. *Bulgarian Journal of Agricultural Science* 26, 1217–1222.
- Neha, Bhople, B.S., Sharma, S., 2020. Seasonal variation of rhizospheric soil properties under different land use systems at lower Shivalik foothills of Punjab, India. *Agroforestry Systems* 94, 1959–1976. <https://doi.org/10.1007/s10457-020-00512-7>.
- Niewiadowska, A., Gaj, R., Przybył, J., Budka, A., Mioduszevska, N., Wolna-Maruwka, A., 2016. Analysis of microbial parameters of soil in different tillage systems under sugar beets (*Beta vulgaris* L.). *Polish Journal of Environmental Studies* 25, 1803–1811. <https://doi.org/10.15244/pjoes/62644>.
- Niewiadowska, A., Majchrzak, L., Borowiak, K., Wolna-Maruwka, A., Waraczewska, Z., Budka, A., Gaj, R., 2020a. The influence of tillage and cover cropping on soil microbial parameters and spring wheat physiology. *Agronomy* 10. <https://doi.org/10.3390/agronomy10020200>.
- Niewiadowska, A., Sulewska, H., Wolna-Maruwka, A., Ratajczak, K., Waraczewska, Z., Budka, A., 2020b. The influence of bio-stimulants and foliar fertilizers on yield, plant features, and the level of soil biochemical activity in white lupine (*Lupinus albus* L.) cultivation. *Agronomy* 10. <https://doi.org/10.3390/agronomy10010150>.
- Ning, C. C., Gao P.D., Wang B.Q., Lin W.P., Jiang N.H., Cai K.Z., 2017. Impacts of Chemical Fertilizer Reduction and Organic Amendments Supplementation on Soil Nutrient, Enzyme Activity and Heavy Metal Content. *Journal of Integrative Agriculture* 16(8):1819–31. doi: 10.1016/S2095-3119(16)61476-4.

- Nisha, Walia, M., Batra, N., Gera, R., Goyal, S., 2019. Impact of management practices on soil microbial properties under wheat-cluster bean cropping system. *Legume Research* 42, 565–571. <https://doi.org/10.18805/LR-3908>.
- Nivelle, E., Verzeaux, J., Chabot, A., Roger, D., Chesnais, Q., Ameline, A., Lacoux, J., Nava-Saucedo, J.E., Tétu, T., Catterou, M., 2018. Effects of glyphosate application and nitrogen fertilization on the soil and the consequences on aboveground and belowground interactions. *Geoderma* 311, 45–57. <https://doi.org/10.1016/j.geoderma.2017.10.002>.
- Noronha, F.R., Manikandan, S.K., Nair, V., 2022. Role of coconut shell biochar and earthworm (*Eudrilus euginea*) in bioremediation and palak spinach (*Spinacia oleracea* L.) growth in cadmium-contaminated soil. *Journal of Environmental Management* 302, 114057. <https://doi.org/10.1016/j.jenvman.2021.114057>.
- Notaro, K.A., Medeiros, E.V. de, Duda, G.P., Moreira, K.A., Barros, J.A. de, Santos, U.J. dos, Lima, J.R. de S., Moraes, W. da S., 2018. Enzymatic activity, microbial biomass, and organic carbon of entisols from brazilian tropical dry forest and annual and perennial crops. *Chilean Journal of Agricultural Research* 78, 68–77. <https://doi.org/10.4067/S0718-58392018000100068>.
- Ntalli, N., Tsiafouli, M.A., Tzani, K., Mavridi, O., Oplos, C., Menkissoglu-Spiroudi, U., Monokrousos, N., 2019a. Whey: The soil bio-community enhancer that selectively controls root-knot nematodes. *Plants* 8, 1–15. <https://doi.org/10.3390/plants8110445>.
- Ntalli, N., Zioga, D., D, M.A., M, E.P., Menkissoglu-Spiroudi, U., Monokrousos, N., 2019b. Anise, parsley and rocket as nematicidal soil amendments and their impact on non-target soil organisms. *Applied Soil Ecology* 143, 17–25. <https://doi.org/10.1016/j.apsoil.2019.05.024>.
- Nurulita, Y., Adetutu, E.M., Gunawan, H., Zul, D., Ball, A.S., 2016. Restoration of tropical peat soils: The application of soil microbiology for monitoring the success of the restoration process. *Agriculture, Ecosystems and Environment* 216, 293–303. <https://doi.org/10.1016/j.agee.2015.09.031>.
- Nuruzzaman, M., Lambers, H., Bolland, M.D.A., Veneklaas, E.J., 2006. Distribution of carboxylates and acid phosphatase and depletion of different phosphorus fractions in the rhizosphere of a cereal and three grain legumes. *Plant and Soil* 281, 109–120. <https://doi.org/10.1007/s11104-005-3936-2>.
- Ogunkunle, C.O., Falade, F.O., Oyedeji, B.J., Akande, F.O., Vishwakarma, V., Alagarsamy, K., Ramachandran, D., Fatoba, P.O., 2021. Short-Term Aging of Pod-Derived Biochar Reduces Soil Cadmium Mobility and Ameliorates Cadmium Toxicity to Soil Enzymes and Tomato. *Environmental Toxicology and Chemistry* 40, 3306–3316. <https://doi.org/10.1002/etc.4958>.
- Ohm, M., Paulsen, H.M., Moos, J.H., Eichler-Löbermann, B., 2017. Long-term negative phosphorus budgets in organic crop rotations deplete plant-available phosphorus from soil. *Agronomy for Sustainable Development* 37. <https://doi.org/10.1007/s13593-017-0425-y>.
- Okur, N., Göçmez, S., Tüzel, Y., 2006. Effect of organic manure application and solarization on soil microbial biomass and enzyme activities under greenhouse conditions. *Biological Agriculture and Horticulture* 23, 305–320. <https://doi.org/10.1080/01448765.2006.9755331>.

- Omara, A.E.-D., Hauka, F., Afify, A., El-Din, M.N., Kassem, M., 2017. The Role of Some PGPR Strains to Biocontrol *Rhizoctonia Solani* in Soybean and Enhancement The Growth Dynamics and Seed Yield. *Environment, Biodiversity and Soil Security* 1, 47–59.
- Omenda, J.A., Ngetich, K.F., Kiboi, M.N., Mucheru-Muna, M.W., Mugendi, D.N., 2019. Soil Organic Carbon and Acid Phosphatase Enzyme Activity Response to Phosphate Rock and Organic Inputs in Acidic Soils of Central Highlands of Kenya in Maize. *International Journal of Plant & Soil Science* 30, 1–13. <https://doi.org/10.9734/ijpss/2019/v30i230169>.
- Omid, H., Tahmasebi, Z., Torabi, H., Miransari, M., 2008. Soil enzymatic activities and available P and Zn as affected by tillage practices, canola (*Brassica napus* L.) cultivars and planting dates. *European Journal of Soil Biology* 44, 443–450. <https://doi.org/10.1016/j.ejsobi.2008.05.002>
- Onkum, P., and Teamkao, P., 2020. Soil microbial activities in Alfisol with different green manure application. *International Journal of Agricultural Technology* 16, 319–328.
- Ortiz, J., Faggioli, V.S., Ghio, H., Boccolini, M.F., Ioele, J.P., Tamburrini, P., Garcia, F.O., Gudelj, V., 2020. Long-term impact of fertilization on the structure and functionality of microbial soil community | Impacto a largo plazo de la fertilización sobre la estructura y funcionalidad de la comunidad microbiana del suelo. *Ciencia del Suelo* 38, 45–55.
- Pajares, S., Gallardo, J.F., Masciandaro, G., Ceccanti, B., Marinari, S., Etchevers, J.D., 2009. Biochemical indicators of carbon dynamic in an Acrisol cultivated under different management practices in the central Mexican highlands. *Soil and Tillage Research* 105, 156–163. <https://doi.org/10.1016/j.still.2009.07.002>
- Pan, F., Zhang, W., Liang, Y., Liu, S., Wang, K., 2018. Increased associated effects of topography and litter and soil nutrients on soil enzyme activities and microbial biomass along vegetation successions in karst ecosystem, southwestern China. *Environmental Science and Pollution Research* 25, 16979–16990. <https://doi.org/10.1007/s11356-018-1673-3>.
- Pandey, S., Singh, D.K., 2006. Soil dehydrogenase, phosphomonoesterase and arginine deaminase activities in an insecticide treated groundnut (*Arachis hypogaea* L.) field. *Chemosphere* 63, 869–880. <https://doi.org/10.1016/j.chemosphere.2005.07.053>.
- Pandey, J., Pandey, U., Shubhashish, K., Pandey, R., 2008. Inter-species variations in soil fertility stability in organic farm. *Plant Archives* 8, 61–63.
- Pandey, J., and Pandey, U., 2009. Atmospheric deposition and heavy metal contamination in an organic farming system in a seasonally dry tropical region of India. *Journal of Sustainable Agriculture* 33, 361–378. <https://doi.org/10.1080/10440040902834954>.
- Pankhurst, C.E., Hawke, B.G., McDonald, H.J., Kirkby, C.A., Buckerfield, J.C., Michelsen, P., O'Brien, K.A., Gupta, V.V.S.R., Doube, B.M., 1995. Evaluation of Soil Biological Properties as Potential Bioindicators of Soil Health. *Australian Journal of Experimental Agriculture* 35, 1015–1028. <https://doi.org/10.1071/EA9951015>.

- Papa, S., Bartoli, G., Pellegrino, A., Fioretto, A., 2009. Microbial activities and trace element contents in an urban soil. *Environmental Monitoring and Assessment* 165, 193–203. <https://doi.org/10.1007/s10661-009-0938-1>.
- Pareek N., Ramesh Chandra N., Raverkar, K.P., 2019. Effect of Rhizobium and PGPR Inoculation in Mungbean on Productivity and Soil Properties in Mungbean-Wheat Sequence. *Journal of the Indian Society of Soil Science* (2019) 67 (4): 458-464 . 10.5958/0974-0228.2019.00050.1.
- Parihar, C.M., Yadav, M.R., Jat, S.L., Singh, A.K., Kumar, B., Pradhan, S., Chakraborty, D., Jat, M.L., Jat, R.K., Saharawat, Y.S., Yadav, O.P., 2016. Long term effect of conservation agriculture in maize rotations on total organic carbon, physical and biological properties of a sandy loam soil in north-western Indo-Gangetic Plains. *Soil and Tillage Research* 161, 116–128. <https://doi.org/10.1016/j.still.2016.04.001>.
- Parihar, C.M., Singh, A.K., Jat, S.L., Dey, A., Nayak, H.S., Mandal, B.N., Saharawat, Y.S., Jat, M.L., Yadav, O.P., 2020. Soil quality and carbon sequestration under conservation agriculture with balanced nutrition in intensive cereal-based system. *Soil and Tillage Research* 202, 104653. <https://doi.org/10.1016/j.still.2020.104653>.
- Pascual, I., Antolín, M.C., García, C., Polo, A., Sánchez-Díaz, M., 2007. Effect of water deficit on microbial characteristics in soil amended with sewage sludge or inorganic fertilizer under laboratory conditions. *Bioresource Technology* 98, 29–37. <https://doi.org/10.1016/j.biortech.2005.11.026>.
- Paz-Ferreiro, J., Trasar-Cepeda, C., Leirós, M.C., Seoane, S., Gil-Sotres, F., 2009. Biochemical properties in managed grassland soils in a temperate humid zone: Modifications of soil quality as a consequence of intensive grassland use. *Biology and Fertility of Soils* 45, 711–722. <https://doi.org/10.1007/s00374-009-0382-y>.
- Peixoto, R.S., Chaer, G.M., Franco, N., Junior, F.B.R., Mendes, I.C., Rosado, A.S., 2010. A decade of land use contributes to changes in the chemistry, biochemistry and bacterial community structures of soils in the Cerrado. *Antonie van Leeuwenhoek, International Journal of General and Molecular Microbiology* 98, 403–413. <https://doi.org/10.1007/s10482-010-9454-0>
- Pérez Brandan C., Chavarría D., Huidobro Meriles J.M., Pérez Brandan C., Vargas Gil S., 2017. Influence of a tropical grass (*Brachiaria brizantha* cv. Mulato) as cover crop on soil biochemical properties in a degraded agricultural soil. *European Journal of Soil Biology*, 83: 84–90. <https://doi.org/10.1016/j.ejsobi.2017.10.009>.
- Peruccci P., Scarponi L., Businelli M., 1984. Enzyme activities in a clay-loam soil amended with various crop residues.. *Plant and Soil* 81, 345-351. <https://doi.org/10.1007/BF02323049>.
- Perucci, P., Scarponi, L., 1985. Effect of different treatments with crop residues on soil phosphatase activity. *Biology and Fertility of Soils* 1, 111–115. <https://doi.org/10.1007/BF00255138>.
- Perucci, P., Monaci, E., Onofri, A., Vischetti, C., Casucci, C., 2007. Changes in physico-chemical and biochemical parameters of soil following addition of wood ash: A field experiment. *European Journal of Agronomy* 28, 155–161. <https://doi.org/10.1016/j.eja.2007.06.005>.

- Piotrowska, A., Iamarino, G., Rao, M.A., Gianfreda, L., 2006. Short-term effects of olive mill waste water (OMW) on chemical and biochemical properties of a semiarid Mediterranean soil. *Soil Biology and Biochemistry* 38, 600–610. <https://doi.org/10.1016/j.soilbio.2005.06.012>.
- Pittarello, M., Ferro, N.D., Chiarini, F., Morari, F., Carletti, P., 2021. Influence of tillage and crop rotations in organic and conventional farming systems on soil organic matter, bulk density and enzymatic activities in a short-term field experiment. *Agronomy* 11. <https://doi.org/10.3390/agronomy11040724>.
- Pokharel, P., Ma, Z., Chang, S.X., 2020. Biochar increases soil microbial biomass with changes in extra- and intracellular enzyme activities: a global meta-analysis. *Biochar* 2, 65–79. <https://doi.org/10.1007/s42773-020-00039-1>.
- Pooniya, V., Zhiipao, R.R., Biswakarma, N., Kumar, D., Shivay, Y.S., Babu, S., Das, K., Choudhary, A.K., Swarnalakshmi, K., Jat, R.D., Choudhary, R.L., Ram, H., Khokhar, M.K., Mukri, G., Lakhena, K.K., Puniya, M.M., Jat, R., Muralikrishnan, L., Singh, A.K., Lama, A., 2022. Conservation agriculture based integrated crop management sustains productivity and economic profitability along with soil properties of the maize-wheat rotation. *Scientific Reports* 12, 1–13. <https://doi.org/10.1038/s41598-022-05962-w>.
- Pozo, C., Salmeron, V., Rodelas, B., Martinez-Toledo, M.V., Gonzalez-Lopez, J., 1994. Effects of the herbicide alachlor on soil microbial activities. *Ecotoxicology* 3, 4–10. <https://doi.org/10.1007/BF00121384>.
- Pozo, C., Salmeron, V., Rodelas, B., Martinez-Toledo, M.V., Gonzalez-Lopez, J., 1995. Effects of the fungicides maneb and mancozeb on soil enzyme activities. *Toxicological & Environmental Chemistry* 52, 243–248. <https://doi.org/10.1080/02772249509358265>.
- Pramanik, P., Safique, S., Jahan, A., Bhagat, R.M., 2017. Humic substrates application in diluted form enhanced availability of phosphorus (P) and its uptake by tea bushes in the tea-growing soil of Northeast India. *Journal of Plant Nutrition* 40, 2841–2849. <https://doi.org/10.1080/01904167.2017.1383420>.
- Prasanthi, G., Kumar, N.G., Raghu, S., Srinivasa, N., Gurumurthy, H., 2019. Study on the effect of different levels of organic and inorganic fertilizers on microbial enzymes and soil mesofauna in soybean ecosystem. *Legume Research* 42, 233–237. <https://doi.org/10.18805/LR-3850>.
- Pupin, B., Freddi, O. da S., Nahas, E., 2009. Microbial alterations of the soil influenced by induced compaction. *Revista Brasileira de Ciencia do Solo* 33, 1207–1213. <https://doi.org/10.1590/s0100-06832009000500014>.
- Qaswar, M., Jing, H., Ahmed, W., Dongchu, L., Shujun, L., Ali, S., Kailou, L., Yongmei, X., Lu, Z., Lisheng, L., Jusheng, G., Huimin, Z., 2019. Long-term green manure rotations improve soil biochemical properties, yield sustainability and nutrient balances in acidic paddy soil under a rice-based cropping system. *Agronomy* 9. <https://doi.org/10.3390/agronomy9120780>.
- Qaswar, M., Chai, R., Ahmed, W., Jing, H., Han, T., Liu, K., Ye, X., Xu, Y., Anthonio, C.K., Zhang, H., 2020. Partial substitution of chemical fertilizers with organic amendments increased rice yield by changing phosphorus fractions and improving

phosphatase activities in fluvo-aquic soil. *Journal of Soils and Sediments* 20, 1285–1296. <https://doi.org/10.1007/s11368-019-02476-3>.

Qin, X., Guo, S., Zhai, L., Pan, J., Khoshnevisan, B., Wu, S., Wang, H., Yang, B., Ji, J., Liu, H., 2020. How long-term excessive manure application affects soil phosphorous species and risk of phosphorous loss in fluvo-aquic soil. *Environmental Pollution* 266, 115304. <https://doi.org/10.1016/j.envpol.2020.115304>.

Rabary, B., Sall, S., Letourmy, P., Husson, O., Ralambofetra, E., Moussa, N., Chotte, J.L., 2008. Effects of living mulches or residue amendments on soil microbial properties in direct seeded cropping systems of Madagascar. *Applied Soil Ecology* 39, 236–243. <https://doi.org/10.1016/j.apsoil.2007.12.012>.

Racke, K.D., Steele, K.P., Yoder, R.N., Dick, W.A., Avidov, E., 1996. Factors Affecting the Hydrolytic Degradation of Chlorpyrifos in Soil. *Journal of Agricultural and Food Chemistry* 44, 1582–1592. <https://doi.org/10.1021/jf9506141>.

Radersma, S., and Grierson, P.F., 2004. Phosphorus mobilization in agroforestry: Organic anions, phosphatase activity and phosphorus fractions in the rhizosphere. *Plant and Soil* 259, 209–219. <https://doi.org/10.1023/B:PLSO.0000020970.40167.40>.

Radhakrishnan, A.R.S., Suja, G., Sreekumar, J., 2022. How sustainable is organic management in cassava? Evidences from yield, soil quality, energetics and economics in the humid tropics of South India. *Scientia Horticulturae* 293, 110723. <https://doi.org/10.1016/j.scienta.2021.110723>.

Raghurama, M., Sankaran, M., 2022. Invasive nitrogen-fixing plants increase nitrogen availability and cycling rates in a montane tropical grassland. *PLANT ECOLOGY* 223, 13–26. <https://doi.org/10.1007/s11258-021-01188-4>.

Raiesi, F., 2007. The conversion of overgrazed pastures to almond orchards and alfalfa cropping systems may favor microbial indicators of soil quality in Central Iran. *Agriculture, Ecosystems and Environment* 121, 309–318. <https://doi.org/10.1016/j.agee.2006.11.002>.

Rajashekhara R.B.K., and Siddaramappa R., 2008. Evaluation of soil quality parameters in a tropical paddy soil amended with rice residues and tree litters. *European Journal of Soil Biology*, 44 (3): 334-340. <https://doi.org/10.1016/j.ejsobi.2008.04.002>.

Rakshit, R., Patra, A.K., Purakayastha, T.J., Singh, R.D., Dhar, S., Pathak, H., Das, A., 2016. Effect of super-optimal levels of fertilizers on soil enzymatic activities during growth stages of wheat crop on an Inceptisol. *Journal of Applied and Natural Science* 8, 1398–1403. <https://doi.org/10.31018/jans.v8i3.972>.

Ram, R.A., Singha, A., Singh, V.K., 2019. Improvement in yield and fruit quality of mango (*Mangifera indica*) with organic amendments. *Indian Journal of Agricultural Sciences* 89, 1429–1433.

Ramanandan, L.G., Swaroop, N., David, A.A., Thomas, T., 2020. Effectiveness of Organics with Nitrogen Levels and Bio-fertilizers on Soil Chemico-biological Properties of Wheat (*Triticum aestivum* L.) Crop [Cv.PBW-343] in Inceptisol. *Asian Journal of Soil Science and Plant Nutrition* 6, 30–50. <https://doi.org/10.9734/ajsspn/2020/v6i230084>.

- Ramdas, M.G., Manjunath, B.L., Pratap, S.N., Ramesh, R., Verma, R.R., Marutao, L.A., Ruenna, D., Natasha, B., Rahul, K., 2017. Effect of organic and inorganic sources of nutrients on soil microbial activity and soil organic carbon build-up under rice in west coast of India. *Archives of Agronomy and Soil Science* 63, 414–426. <https://doi.org/10.1080/03650340.2016.1213813>.
- Ramesh, P., Panwar, N.R., Singh, A.B., Ramana, S., Rao, A.S., 2009. Impact of organic-manure combinations on the productivity and soil quality in different cropping systems in central India. *Journal of Plant Nutrition and Soil Science* 172, 577–585. <https://doi.org/10.1002/jpln.200700281>.
- Ramos, M.E., Benítez, E., García, P.A., Robles, A.B., 2010. Cover crops under different managements vs. frequent tillage in almond orchards in semiarid conditions: Effects on soil quality. *Applied Soil Ecology* 44, 6–14. <https://doi.org/10.1016/j.apsoil.2009.08.005>.
- Ramos, M.E., Robles, A.B., Sánchez-Navarro, A., González-Rebollar, J.L., 2011. Soil responses to different management practices in rainfed orchards in semiarid environments. *Soil and Tillage Research* 112, 85–91. <https://doi.org/10.1016/j.still.2010.11.007>.
- Randall, K.C., Brennan, F., Clipson, N., Creamer, R.E., Griffiths, B.S., Storey, S., Doyle, E., 2020. An Assessment of Climate Induced Increase in Soil Water Availability for Soil Bacterial Communities Exposed to Long-Term Differential Phosphorus Fertilization. *Frontiers in Microbiology* 11, 1–14. <https://doi.org/10.3389/fmicb.2020.00682>.
- Rao, A.V., Tarafdar, J.C., Sharma, S.K., Kumar, P., Aggarwal, R.K., 1995. Influence of cropping systems on soil biochemical properties in an arid rain-fed environment. *Journal of Arid Environments* 31, 237–244. <https://doi.org/10.1006/jare.1995.0063>.
- Rao, A.V., Singh, K.C., Gupta, J.P., 1997. Ley farming—an alternate farming system for sustainability in the indian arid zone. *Arid Soil Research and Rehabilitation* 11, 201–210. <https://doi.org/10.1080/15324989709381472>.
- Rasool, N., Reshi, Z.A., Shah, M.A., 2014. Effect of butachlor (G) on soil enzyme activity. *European Journal of Soil Biology* 61, 94–100. <https://doi.org/10.1016/j.ejsobi.2014.02.002>.
- Reardon, C.L., Wuest, S.B., 2016. Soil amendments yield persisting effects on the microbial communities—a 7-year study. *Applied Soil Ecology* 101, 107–116. <https://doi.org/10.1016/j.apsoil.2015.12.013>.
- Recena, R., Torrent, J., Campillo, M.C. del, Delgado, A., 2015. Accuracy of Olsen P to assess plant P uptake in relation to soil properties and P forms. *Agronomy for Sustainable Development* 35, 1571–1579. <https://doi.org/10.1007/s13593-015-0332-Z>.
- Redel, Y.D., Rubio, R., Rouanet, J.L., Borie, F., 2007. Phosphorus bioavailability affected by tillage and crop rotation on a Chilean volcanic derived Ultisol. *Geoderma* 139, 388–396. <https://doi.org/10.1016/j.geoderma.2007.02.018>.
- Redel, Y.D., Escudey, M., Alvear, M., Conrad, J., Borie, F., 2011. Effects of tillage and crop rotation on chemical phosphorus forms and some related biological activities in a

Chilean Ultisol. *Soil Use and Management* 27, 221–228.  
<https://doi.org/10.1111/j.1475-2743.2011.00334.x>.

Rezaei-Chiyaneh, E., Amirnia, R., Chiyaneh, S.F., Maggi, F., Barin, M., Razavi, B.S., 2021. Improvement of dragonhead (*Dracocephalum moldavica* L.) yield quality through a coupled intercropping system and vermicompost application along with maintenance of soil microbial activity. *Land Degradation and Development* 32, 2833–2848. <https://doi.org/10.1002/ldr.3957>.

Riah, W., Laval, K., Laroche-Ajzenberg, E., Mougin, C., Latour, X., Trinsoutrot-Gattin, I., 2014. Effects of pesticides on soil enzymes: A review. *Environmental Chemistry Letters* 12, 257–273. <https://doi.org/10.1007/s10311-014-0458-2>.

Rietz, D.N., and Haynes, R.J., 2003. Effects of irrigation-induced salinity and sodicity on soil microbial activity. *Soil Biology and Biochemistry* 35, 845–854.  
[https://doi.org/10.1016/S0038-0717\(03\)00125-1](https://doi.org/10.1016/S0038-0717(03)00125-1).

Roldán, A., Salinas-García, J.R., Alguacil, M.M., Caravaca, F., 2007. Soil sustainability indicators following conservation tillage practices under subtropical maize and bean crops. *Soil and Tillage Research* 93, 273–282.  
<https://doi.org/10.1016/j.still.2006.05.001>.

Romanya J., Blanco-Moreno J. M., Sans F. X., 2017. Phosphorus mobilization in low-P arable soils may involve soil organic C depletion. *Soil Biology & Biochemistry* 113: 250e259. <http://dx.doi.org/10.1016/j.soilbio.2017.06.015>.

Romero-Trigueros, C., Díaz-López, M., Vivaldi, G.A., Camposeo, S., Nicolás, E., Bastida, F., 2021. Plant and soil microbial community responses to different water management strategies in an almond crop. *Science of the Total Environment* 778. <https://doi.org/10.1016/j.scitotenv.2021.146148>.

Romero, E., Benítez, E., Nogales, R., 2005. Suitability of wastes from olive-oil industry for initial reclamation of a Pb/Zn mine tailing. *Water, Air, and Soil Pollution* 165, 153–165. <https://doi.org/10.1007/s11270-005-4638-3>.

Roohi, M., Arif, M.S., Yasmeen, T., Riaz, M., Rizwan, M., Shahzad, S.M., Ali, S., Bragazza, L., 2020. Effects of cropping system and fertilization regime on soil phosphorous are mediated by rhizosphere-microbial processes in a semi-arid agroecosystem. *Journal of Environmental Management* 271, 111033. <https://doi.org/10.1016/j.jenvman.2020.111033>.

Ros, M., García, C., Hernandez, M.T., 2007. Evaluation of different pig slurry composts as fertilizer of horticultural crops: Effects on selected chemical and microbial properties. *Renewable Agriculture and Food Systems* 22, 307–315.  
<https://doi.org/10.1017/S1742170507001913>.

Ros, M., Garcia, C., Hernandez, M.T., Lacasa, A., Fernandez, P., Pascual, J.A., 2008. Effects of biosolarization as methyl bromide alternative for *Meloidogyne incognita* control on quality of soil under pepper. *Biology and Fertility of Soils* 45, 37–44. <https://doi.org/10.1007/s00374-008-0307-1>.

Rouydel, Z., Barin, M., Rasouli-Sadaghiani, M.H., Khezri, M., Vetukuri, R.R., Kushwaha, S., 2021. Harnessing the potential of symbiotic endophytic fungi and plant growth-promoting rhizobacteria to enhance soil quality in saline soils. *Processes* 9. <https://doi.org/10.3390/pr9101810>.



- Roy, T., Biswas, D.R.R., Ghosh, A., Patra, A.K.K., Singh, R.D.D., Sarkar, A., Biswas, S.S.S., 2019. Dynamics of culturable microbial fraction in an Inceptisol under short-term amendment with municipal sludge from different sources. *Applied Soil Ecology* 136, 116–121. <https://doi.org/10.1016/j.apsoil.2018.12.024>.
- Ruiz, J.L., and Salas, M.D.C., 2019. Evaluation of organic substrates and microorganisms as bio-fertilisation tool in container crop production. *Agronomy* 9. <https://doi.org/10.3390/agronomy9110705>.
- Saad, R.F., Kobaissi, A., Echevarria, G., Kidd, P., Calusinska, M., Goux, X., Benizri, E., 2018. Influence of new agromining cropping systems on soil bacterial diversity and the physico-chemical characteristics of an ultramafic soil. *Science of the Total Environment* 645, 380–392. <https://doi.org/10.1016/j.scitotenv.2018.07.106>.
- Sadeghi, H., and Taban, A., 2021. Crushed maize seeds enhance soil biological activity and salt tolerance in caper (*Capparis spinosa* L.). *Industrial Crops and Products* 160, 113103. <https://doi.org/10.1016/j.indcrop.2020.113103>.
- Saha, A., Bhaduri, D., Pipariya, A., Jain, N.K., 2016. Influence of imazethapyr and quizalofop-p-ethyl application on microbial biomass and enzymatic activity in peanut grown soil. *Environmental Science and Pollution Research* 23, 23758–23771. <https://doi.org/10.1007/s11356-016-7553-9>.
- Saha, A., Basak, B.B., Gajbhiye, N.A., Kalariya, K.A., Manivel, P., 2019. Sustainable fertilization through co-application of biochar and chemical fertilizers improves yield, quality of *Andrographis paniculata* and soil health. *Industrial Crops and Products* 140, 111607. <https://doi.org/10.1016/j.indcrop.2019.111607>.
- Saha, S., Mina, B.L., Gopinath, K.A., Kundu, S., Gupta, H.S., 2008a. Relative changes in phosphatase activities as influenced by source and application rate of organic composts in field crops. *Bioresource Technology* 99, 1750–1757. <https://doi.org/10.1016/j.biortech.2007.03.049>.
- Saha, S., Mina, B.L., Gopinath, K.A., Kundu, S., Gupta, H.S., 2008b. Organic amendments affect biochemical properties of a subtemperate soil of the Indian Himalayas. *Nutrient Cycling in Agroecosystems* 80, 233–242. <https://doi.org/10.1007/s10705-007-9139-x>.
- Salam, A., Bashir, S., Khan, I., Hussain, Q., Gao, R., Hu, H., 2019. Biochar induced Pb and Cu immobilization, phytoavailability attenuation in Chinese cabbage, and improved biochemical properties in naturally co-contaminated soil. *Journal of Soils and Sediments* 19, 2381–2392. <https://doi.org/10.1007/s11368-019-02250-5>.
- Sales, F.R., Silva, A.O., Sales, L.R., Rodrigues, T.L., Moreira, F.M. de S., Carneiro, M.A.C., 2021. Native Arbuscular Mycorrhizal Fungi Exhibit Biotechnological Potential in Improvement of Soil Biochemical Quality and in Increasing Yield in Sugarcane Cultivars. *Sugar Tech* 23, 1235–1246. <https://doi.org/10.1007/s12355-021-01016-z>.
- Sánchez-Peinado, M. del M., Rodelas, B., Martínez-Toledo, M.V., González-López, J., Pozo, C., 2009. Response of soil enzymes to Linear Alkylbenzene Sulfonate (LAS) addition in soil microcosms. *Soil Biology and Biochemistry* 41, 69–76. <https://doi.org/10.1016/j.soilbio.2008.09.019>.
- Sangma, C.B.K., Thakuria, D., Biam, D.E.D., 2016. Rice ecosystems in hill agriculture: Effect on soil biological pools of carbon, nitrogen and phosphorus. *Journal of the*

Indian Society of Soil Science 64, 391–401. <https://doi.org/10.5958/0974-0228.2016.00051.7>.

Santos, E.S., Abreu, M.M., Macías, F., de Varennes, A., 2016. Chemical quality of leachates and enzymatic activities in Technosols with gossan and sulfide wastes from the São Domingos mine. *Journal of Soils and Sediments*, 16, 1366–1382. <https://doi.org/10.1007/s11368-015-1068-8>.

Šarapatka, B., Dudová, L., Kršková, M., 2004. Effect of pH and phosphate supply on acid phosphatase activity in cereal roots. *Biologia - Section Botany* 59, 127–131.

Sarkar, B., Patra, A.K., Purakayastha, T.J., Megharaj, M., 2009. Assessment of biological and biochemical indicators in soil under transgenic Bt and non-Bt cotton crop in a sub-tropical environment. *Environmental Monitoring and Assessment* 156, 595–604. <https://doi.org/10.1007/s10661-008-0508-y>.

Sarkar, I.U.I.U.I.U., Jahan, A., Naher, U.A.U.A., Iqbal, M., Mamun, A.A., Biswas, J.C.J.C.J.C., Islam, R., 2020. Organic and inorganic amendment of wetland paddy soil for five years: effects on phosphorus fraction dynamics. *Journal of Crop Improvement* 34, 875–896. <https://doi.org/10.1080/15427528.2020.1784343>.

Sarma, B., and Gogoi, N., 2017. Nitrogen Management for Sustainable Soil Organic Carbon Increase in Inceptisols Under Wheat Cultivation. *Communications in Soil Science and Plant Analysis* 48, 1428–1437. <https://doi.org/10.1080/00103624.2017.1373785>.

Savin, M.C., Purcell, L.C., Daigh, A., Manfredini, A., 2009. Response of mycorrhizal infection to glyphosate applications and P fertilization in glyphosate-tolerant soybean, Maize, and Cotton. *Journal of Plant Nutrition* 32, 1702–1717. <https://doi.org/10.1080/01904160903150941>.

Saviozzi, A., Levi-Minzi, R., Cardelli, R., Riffaldi, R., 2001. A comparison of soil quality in adjacent cultivated, forest and native grassland soils. *Plant and Soil* 233, 251–259. <https://doi.org/10.1023/A:1010526209076>.

Schaller, K., 2003. Green manuring as a tool to improve physical and chemical soil properties, prevent erosion as well as conserving essential plant nutrients. *Bulletinul USAMV-CN* 59:188–93.

Schoebitz, M., López, M.D., Serri, H., Aravena, V., Zagal, E., Roldán, A., 2019. Characterization of Bioactive Compounds in Blueberry and Their Impact on Soil Properties in Response to Plant Biostimulants. *Communications in Soil Science and Plant Analysis* 50, 2482–2494. <https://doi.org/10.1080/00103624.2019.1667374>.

Schoebitz, M., Castillo, D., Jorquera, M., Roldan, A., 2020. Responses of microbiological soil properties to intercropping at different planting densities in an acidic Andisol. *Agronomy* 10. <https://doi.org/10.3390/agronomy10060781>.

Sciubba, L., Mazzon, M., Cavani, L., Baldi, E., Toselli, M., Ciavatta, C., Marzadori, C., 2021. Soil response to agricultural land abandonment: A case study of a vineyard in Northern Italy. *Agronomy* 11. <https://doi.org/10.3390/agronomy11091841>.

Senwo, Z.N., Ranatunga, T.D., Tazisong, I.A., Taylor, R.W., He, Z., 2007. Phosphatase activity of Ultisols and relationship to soil fertility indices. *Journal of Food, Agriculture and Environment* 5, 262–266.

- Sepat, S., Behera, U.K., Sharma, A.R., Das, T.K., Bhattacharyya, R., 2014. Productivity, organic carbon and residual soil fertility of Pigeonpea-wheat cropping system under varying tillage and residue management. *Proceedings of the National Academy of Sciences India Section B - Biological Sciences* 84, 561–571.  
<https://doi.org/10.1007/s40011-014-0359-y>.
- Serafim, M.E., Zeviani, W.M., Ono, F.B., Neves, L.G., Silva, B.M., Lal, R., 2019. Reference values and soil quality in areas of high soybean yield in Cerrado region, Brazil. *Soil and Tillage Research* 195. <https://doi.org/10.1016/j.still.2019.104362>.
- Serrano, A., Tejada, M., Gallego, M., Gonzalez, J.L., 2009. Evaluation of soil biological activity after a diesel fuel spill. *Science of the Total Environment* 407, 4056–4061.  
<https://doi.org/10.1016/j.scitotenv.2009.03.017>.
- Serri D.L., Boccolini M., Oberto R., Chavarría D., Bustos N., Vettorello C., Apezteguía H., Miranda J., Alvarez C., Galarza C., Chiófalo S., Manrique M., Sueldo R., Fernández Belmonte M.C., Mattalia L., Cholaky C., Vargas Gil S., 2018. Efecto de la agricultura sobre la calidad biológica del suelo. *Ciencia del Suelo* (Argentina),36(2): 92-104. <https://dialnet.unirioja.es/servlet/articulo?codigo=6978782>.
- Shahane, A.A., Shivay, Y.S., Prasanna, R., 2020. Enhancing phosphorus and iron nutrition of wheat through crop establishment techniques and microbial inoculations in conjunction with fertilization. *Soil Science and Plant Nutrition* 66, 763–771.  
<https://doi.org/10.1080/00380768.2020.1799692>.
- Shao, X. hua, Zheng, J. wei, 2014. Soil organic carbon, black carbon, and enzyme activity under long-term fertilization. *Journal of Integrative Agriculture* 13, 517–524.  
[https://doi.org/10.1016/S2095-3119\(13\)60707-8](https://doi.org/10.1016/S2095-3119(13)60707-8).
- Sharma, R.C., Sarkar, S., Das, D., Banik, P., 2013a. Impact Assessment of Arbuscular Mycorrhiza *Azospirillum* and Chemical Fertilizer Application on Soil Health and Ecology. *Communications in Soil Science and Plant Analysis* 44, 1116–1126.  
<https://doi.org/10.1080/00103624.2012.750335>.
- Sharma, P., Singh, G., Singh, R.P., 2013b. Conservation tillage and optimal water supply enhance microbial enzyme (glucosidase, urease and phosphatase) activities in fields under wheat cultivation during various nitrogen management practices. *Archives of Agronomy and Soil Science* 59, 911–928.  
<https://doi.org/10.1080/03650340.2012.690143>.
- Sharma, S., Thind, H.S., Singh, Y., Singh, V., Singh, B., 2015. Soil enzyme activities with biomass ashes and phosphorus fertilization to rice–wheat cropping system in the Indo-Gangetic plains of India. *Nutrient Cycling in Agroecosystems* 101, 391–400.  
<https://doi.org/10.1007/s10705-015-9684-7>.
- Sharma, S., Dhaliwal, S.S., 2019a. Effect of Sewage Sludge and Rice Straw Compost on Yield, Micronutrient Availability and Soil Quality under Rice–Wheat System. *Communications in Soil Science and Plant Analysis* 50, 1943–1954.  
<https://doi.org/10.1080/00103624.2019.1648489>.
- Sharma, S., Vashisht, M., Singh, Y., Thind, H.S., 2019b. Soil carbon pools and enzyme activities in aggregate size fractions after seven years of conservation agriculture in a rice-wheat system. *Crop and Pasture Science* 70, 473–485.  
<https://doi.org/10.1071/CP19013>

- Sharpley, A.N., Robinson, J.S., Smith, S.J., 1995. Bioavailable phosphorus dynamics in agricultural soils and effects on water quality. *Geoderma* 67, 1–15. [https://doi.org/10.1016/0016-7061\(94\)00027-8](https://doi.org/10.1016/0016-7061(94)00027-8).
- Shi, Y., Lalande, R., Ziadi, N., Sheng, M., Hu, Z., 2012. An assessment of the soil microbial status after 17 years of tillage and mineral P fertilization management. *Applied Soil Ecology* 62, 14–23. <https://doi.org/10.1016/j.apsoil.2012.07.004>.
- Shi, X.M., Li, X.G., Li, C.T., Zhao, Y., Shang, Z.H., Ma, Q., 2013. Grazing exclusion decreases soil organic C storage at an alpine grassland of the Qinghai-Tibetan Plateau. *Ecological Engineering* 57, 183–187. <https://doi.org/10.1016/j.ecoleng.2013.04.032>.
- Shi, L., Guo, Z., Liang, F., Xiao, X., Peng, C., Zeng, P., Feng, W., Ran, H., 2019a. Effect of liming with various water regimes on both immobilization of cadmium and improvement of bacterial communities in contaminated paddy: A field experiment. *International Journal of Environmental Research and Public Health* 16. <https://doi.org/10.3390/ijerph16030498>.
- Shi, S., Tian, L., Nasir, F., Bahadur, A., Batool, A., Luo, S., Yang, F., Wang, Z., Tian, C., 2019b. Response of microbial communities and enzyme activities to amendments in saline-alkaline soils. *Applied Soil Ecology* 135, 16–24. <https://doi.org/10.1016/j.apsoil.2018.11.003>.
- Shi, Y., Ziadi, N., Hamel, C., Bélanger, G., Abdi, D., Lajeunesse, J., Lafond, J., Lalande, R., Shang, J., 2020. Soil microbial biomass, activity and community structure as affected by mineral phosphorus fertilization in grasslands. *Applied Soil Ecology* 146, 103391. <https://doi.org/10.1016/j.apsoil.2019.103391>.
- Shi, J., Gong, J., Baoyin, T., Luo, Q., Zhai, Z., Zhu, C., Yang, B., Wang, B., Zhang, Z., Li, X., 2021. Short-term phosphorus addition increases soil respiration by promoting gross ecosystem production and litter decomposition in a typical temperate grassland in northern China. *CATENA* 197, 104952. <https://doi.org/10.1016/j.catena.2020.104952>.
- Siddaramappa, R., Wright, R.J., Codling, E.E., Gao, G., McCarty, G.W., 1994. Evaluation of coal combustion byproducts as soil liming materials: their influence on soil pH and enzyme activities. *Biology and Fertility of Soils* 17, 167–172. <https://doi.org/10.1007/BF00336317>.
- Siebielec, G., Siebielec, S., Lipski, D., 2018. Long-term impact of sewage sludge, digestate and mineral fertilizers on plant yield and soil biological activity. *Journal of Cleaner Production* 187, 372–379. <https://doi.org/10.1016/j.jclepro.2018.03.245>.
- Sigua, G.C., Stone, K.C., Bauer, P.J., Szogi, A.A., 2017. Phosphorus dynamics and phosphatase activity of soils under corn production with supplemental irrigation in humid coastal plain region, USA. *Nutrient Cycling in Agroecosystems* 109, 249–267. <https://doi.org/10.1007/s10705-017-9882-6>.
- Silva, A.S. da, Filho, A.C., Nakatani, A.S., Alves, S.J., Andrade, D.S. de, Guimarães, M. de F., 2015. Atributos microbiológicos do solo em sistema de integração. *Revista Brasileira de Ciencia do Solo* 39, 40–48. <https://doi.org/10.1590/01000683rbcs20150185>.

- Silvestro, L.B., Biganzoli, F., Forjan, H., Albanesi, A., Arambarri, A.M., Manso, L., Moreno, M.V., 2017. Mollisol: Biological characterization under zero tillage with different crops sequences. *Journal of Agricultural Science and Technology* 19, 245–257.
- Simanca Fontalvo R. M., and Cuervo Andrade J. L., 2018. Effect of organic amendments and sulfur on chemical and biological properties of a sodic soil Efeito de corretivos orgânicos e enxofre nas propriedades químicas e biológicas de um solo sódico. *Spanish journal of soil science (SJSS)* (2018) 8 (3): 347-362. 10.3232/SJSS.2018.V8.N3.04.
- Singh, N., 2005. Factors affecting triadimefon degradation in soils. *Journal of Agricultural and Food Chemistry* 53, 70–75. <https://doi.org/10.1021/jf048884j>.
- Singh, A., and Ghoshal, N., 2013. Impact of herbicide and various soil amendments on soil enzymes activities in a tropical rainfed agroecosystem. *European Journal of Soil Biology* 54, 56–62. <https://doi.org/10.1016/j.ejsobi.2012.10.003>.
- Singh, K., Pandey, V.C., Singh, B., Singh, R.R., 2012. Ecological restoration of degraded sodic lands through afforestation and cropping. *Ecological Engineering* 43, 70–80. <https://doi.org/10.1016/j.ecoleng.2012.02.029>.
- Singh, K., Singh, B., Singh, R.R., 2012. Changes in physico-chemical, microbial and enzymatic activities during restoration of degraded sodic land: Ecological suitability of mixed forest over monoculture plantation. *Catena* 96, 57–67. <https://doi.org/10.1016/j.catena.2012.04.007>.
- Singh, S.R., Kundu, D.K., Tripathi, M.K., Dey, P., Saha, A.R., Kumar, M., Singh, I., Mahapatra, B.S., 2015. Impact of balanced fertilization on nutrient acquisition, fibre yield of jute and soil quality in New Gangetic alluvial soils of India. *Applied Soil Ecology* 92, 24–34. <https://doi.org/10.1016/j.apsoil.2015.03.007>.
- Singh, G., Bhattacharyya, R., Das, T.K., Sharma, A.R., Ghosh, A., Das, S., Jha, P., 2018a. Crop rotation and residue management effects on soil enzyme activities, glomalin and aggregate stability under zero tillage in the Indo-Gangetic Plains. *Soil and Tillage Research* 184, 291–300. <https://doi.org/10.1016/j.still.2018.08.006>.
- Singh, S.R., Kundu, D.K., Dey, P., Singh, P., Mahapatra, B.S., 2018b. Effect of balanced fertilizers on soil quality and lentil yield in Gangetic alluvial soils of India. *Journal of Agricultural Science* 156, 225–240. <https://doi.org/10.1017/S0021859618000254>.
- Singh, C., Rakshit, R., Das, A., Bharti, P., 2020. Interpretations of Elemental and Microbial Phosphorus Indicators to Understand P Availability in Soils Under Rice–Wheat Cropping System. *Agricultural Research* 9, 329–339. <https://doi.org/10.1007/s40003-019-00439-1>.
- Singh, S., and Sharma, S., 2020. Temporal changes in rhizosphere biological soil quality indicators of wheat in response to nitrogen and straw incorporation. *Tropical Ecology* 61, 328–344. <https://doi.org/10.1007/s42965-020-00092-8>.
- Singh, S.R., Yadav, P., Singh, D., Bahadur, L., Singh, S.P., Yadav, A.S., Mishra, A., Yadav, P.P.S., Kumar, S., 2021. Impact of different cropping systems on the land nutrient index, microbial diversity, and soil quality. *Land Degradation and Development* 32, 3973–3991. <https://doi.org/10.1002/ldr.3863>.

- Singh, G., Bhattacharyya, R., Dhaked, B.S., Das, T.K., 2022. Soil aggregation, glomalin and enzyme activities under conservation tilled rice-wheat system in the Indo-Gangetic Plains. *Soil and Tillage Research* 217, 105272. <https://doi.org/10.1016/j.still.2021.105272>.
- Siwik-Ziomek, A., Lemanowicz, J., 2014. The content of carbon, nitrogen, phosphorus and sulphur in soil against the activity of selected hydrolases as affected by crop rotation and fertilisation. *Zemdirbyste* 101, 367–372. <https://doi.org/10.13080/z-a.2014.101.046>.
- Sofo, A., Scopa, A., Dumontet, S., Mazzatura, A., Pasquale, V., 2012. Toxic effects of four sulphonylureas herbicides on soil microbial biomass. *Journal of Environmental Science and Health - Part B Pesticides, Food Contaminants, and Agricultural Wastes* 47, 653–659. <https://doi.org/10.1080/03601234.2012.669205>.
- Soni, P.G., Basak, N., Rai, A.K., Sundha, P., Narjary, B., Kumar, P., Yadav, G., Kumar, S., Yadav, R.K., 2021. Deficit saline water irrigation under reduced tillage and residue mulch improves soil health in sorghum-wheat cropping system in semi-arid region. *Scientific Reports* 11, 1–13. <https://doi.org/10.1038/s41598-020-80364-4>.
- Soon, Y.K., Rice, W.A., Arshad, M.A., Mills, P., 2000. Effect of pipeline installation on crop yield and some biological properties of boreal soils. *Canadian Journal of Soil Science* 80, 483–488. <https://doi.org/10.4141/S99-096>.
- Stegarescu, G., Reintam, E., Tõnutare, T., 2021. Cover crop residues effect on soil structural stability and phosphatase activity. *Acta Agriculturae Scandinavica Section B: Soil and Plant Science* 71, 992–1005. <https://doi.org/10.1080/09064710.2021.1973083>.
- Stege, P.W., Messina, G.A., Bianchi, G., Olsina, R.A., Raba, J., 2009. Determination of arylsulphatase and phosphatase enzyme activities in soil using screen-printed electrodes modified with multi-walled carbon nanotubes. *Soil Biology and Biochemistry* 41, 2444–2452. <https://doi.org/10.1016/j.soilbio.2009.08.024>.
- Stehouwer, R.C., Dick, W.A., Traina, S.J., 1993. Characteristics of earthworm burrow lining affecting atrazine sorption. *Journal of Environmental Quality* 22, 181–185. <https://doi.org/10.2134/jeq1993.00472425002200010024x>.
- Stenberg, B., Pell, M., Torstensson, L., 1998. Integrated evaluation of variation in biological, chemical and physical soil properties. *Ambio* 27, 9–15.
- Stoven, K., and Schnug, E., 2009. Long term effects of heavy metal enriched sewage sludge disposal in agriculture on soil biota. *Landbauforschung Volkenrode* 59, 131–138.
- Sudhakaran, M., Ramamoorthy, D., Savitha, V., Kirubakaran, N., 2019. Soil Enzyme Activities and Their Relationship with Soil Physico-Chemical Properties and Oxide Minerals in Coastal Agroecosystem of Puducherry. *Geomicrobiology Journal* 36, 452–459. <https://doi.org/10.1080/01490451.2019.1570396>.
- Sun, J., Zou, L., Li, W., Yang, J., Wang, Y., Xia, Q., Peng, M., 2018. Rhizosphere soil properties and banana Fusarium wilt suppression influenced by combined chemical and organic fertilizations. *Agriculture, Ecosystems and Environment* 254, 60–68. <https://doi.org/10.1016/j.agee.2017.10.010>.

- Sun, B., Gao, Y., Wu, X., Ma, H., Zheng, C., Wang, X., Zhang, H., Li, Z., Yang, H., 2019. The relative contributions of pH, organic anions, and phosphatase to rhizosphere soil phosphorus mobilization and crop phosphorus uptake in maize/alfalfa polyculture. *Plant and Soil* 447, 117–133. <https://doi.org/10.1007/s11104-019-04110-0>.
- Sun, Y., Goll, D.S., Ciais, P., Peng, S., Margalef, O., Asensio, D., Sardans, J., Peñuelas, J., 2020. Spatial Pattern and Environmental Drivers of Acid Phosphatase Activity in Europe. *Frontiers in Big Data* 2, 1–13. <https://doi.org/10.3389/fdata.2019.00051>.
- Svensson, K., Pell, M., 2001. Soil microbial tests for discriminating between different cropping systems and fertiliser regimes. *Biology and Fertility of Soils* 33, 91–99. <https://doi.org/10.1007/s003740000292>.
- Swedrzyńska, D., Małecka, I., Bleharczyk, A., Swedrzyński, A., Starzyk, J., 2013. Effects of various long-term tillage systems on some chemical and biological properties of soil. *Polish Journal of Environmental Studies* 22, 1835–1844.
- Takeda, M., Nakamoto, T., Miyazawa, K., Murayama, T., Okada, H., 2009. Phosphorus availability and soil biological activity in an Andosol under compost application and winter cover cropping. *Applied Soil Ecology* 42, 86–95. <https://doi.org/10.1016/j.apsoil.2009.02.003>.
- Tamilselvi, S.M., Chinnadurai, C., Ilamurugu, K., Arulmozhiselvan, K., Balachandar, D., 2015. Effect of long-term nutrient managements on biological and biochemical properties of semi-arid tropical alfisol during maize crop development stages. *Ecological Indicators* 48, 76–87. <https://doi.org/10.1016/j.ecolind.2014.08.001>.
- Tan, J.L., Kang Y.H., 2009. Changes in Soil Properties Under the Influences of Cropping and Drip Irrigation During the Reclamation of Severe Salt-Affected Soils. *Agricultural Sciences in China* 8(10):1228–37. doi: 10.1016/S1671-2927(08)60333-8.
- Tan, X., Xie, B., Wang, J., He, W., Wang, X., Wei, G., 2014. County-scale spatial distribution of soil enzyme activities and enzyme activity indices in agricultural land: Implications for soil quality assessment. *Scientific World Journal* 2014. <https://doi.org/10.1155/2014/535768>.
- Tao, J., Griffiths, B., Zhang, S., Chen, X., Liu, M., Hu, F., Li, H., 2009. Effects of earthworms on soil enzyme activity in an organic residue amended rice-wheat rotation agro-ecosystem. *Applied Soil Ecology* 42, 221–226. <https://doi.org/10.1016/j.apsoil.2009.04.003>.
- Tarafdar, J.C., and Claassen, N., 1988. Organic phosphorus compounds as a phosphorus source for higher plants through the activity of phosphatases produced by plant roots and microorganisms. *Biology and Fertility of Soils* 5, 308–312. <https://doi.org/10.1007/BF00262137>.
- Tarafdar, J.C., Kiran, B., Rao, A.V., 1989. Phosphatase activity and distribution of phosphorus in arid soil profiles under different land use patterns. *Journal of Arid Environments* 16, 29–34. [https://doi.org/10.1016/s0140-1963\(18\)31044-9](https://doi.org/10.1016/s0140-1963(18)31044-9).
- Tarafdar, J.C., and Rao, A.V., 1996. Contribution of *Aspergillus* strains to acquisition of phosphorus by wheat (*Triticum aestivum* L.) and chick pea (*Cicer arietinum* Linn.) grown in a loamy sand soil. *Applied Soil Ecology* 3, 109–114. [https://doi.org/10.1016/0929-1393\(95\)00084-4](https://doi.org/10.1016/0929-1393(95)00084-4).

- Tarafdar, J.C., and Gharu, A., 2006. Mobilization of organic and poorly soluble phosphates by *Chaetomium globosum*. *Applied Soil Ecology* 32, 273–283. <https://doi.org/10.1016/j.apsoil.2005.08.005>.
- Tavali, I.E., Orman, S., Ozgur, A., Uz, I., Sulaman, S., 2021. Monitoring the changes in the microbial dynamics of calcareous soil with the amendment of stabilized and dried sewage sludge in mediterranean region of turkey. *Polish Journal of Environmental Studies* 30, 5263–5271. <https://doi.org/10.15244/pjoes/135613>.
- Taylor, J.P., Wilson, B., Mills, M.S., Burns, R.G., 2002. Comparison of microbial numbers and enzymatic activities in surface soils and subsoils using various techniques. *Soil Biology and Biochemistry* 34, 387–401. [https://doi.org/10.1016/S0038-0717\(01\)00199-7](https://doi.org/10.1016/S0038-0717(01)00199-7).
- Tejada, M., Garcia, C., Gonzalez, J.L., Hernandez, M.T., 2006. Organic Amendment Based on Fresh and Composted Beet Vinsasse. *Soil Science Society of America Journal* 70, 900–908. <https://doi.org/10.2136/sssaj2005.0271>.
- Tejada, M., and Gonzalez, J.L., 2007. Application of different organic wastes on soil properties and wheat yield. *Agronomy Journal* 99, 1597–1606. <https://doi.org/10.2134/agronj2007.0019>.
- Tejada, M., Moreno, J.L., Hernandez, M.T., Garcia, C., 2007. Application of two beet vinsasse forms in soil restoration: Effects on soil properties in an arid environment in southern Spain. *Agriculture, Ecosystems and Environment* 119, 289–298. <https://doi.org/10.1016/j.agee.2006.07.019>.
- Tejada, M., and González, J.L., 2009. Application of two vermicomposts on a rice crop: Effects on soil biological properties and rice quality and yield. *Agronomy Journal* 101, 336–344. <https://doi.org/10.2134/agronj2008.0211>.
- Tejada, M., Hernandez, M.T., Garcia, C., 2009. Soil restoration using composted plant residues: Effects on soil properties. *Soil and Tillage Research* 102, 109–117. <https://doi.org/10.1016/j.still.2008.08.004>.
- Tejada, M., and Benítez, C., 2011. Organic amendment based on vermicompost and compost: Differences on soil properties and maize yield. *Waste Management and Research* 29, 1185–1196. <https://doi.org/10.1177/0734242X10383622>.
- Tejada, M., Morillo, E., Gómez, I., Madrid, F., Undabeytia, T., 2017. Effect of controlled release formulations of diuron and alachlor herbicides on the biochemical activity of agricultural soils. *Journal of Hazardous Materials* 322, 334–347. <https://doi.org/10.1016/j.jhazmat.2016.10.002>.
- Teng, W., Deng, Y., Chen, X.-P., Xu, X.-F., Chen, R.-Y., Lv, Y., Zhao, Y.-Y., Zhao, X.-Q., He, X., Li, B., Zhang, F.-S., Li, Z.-S., 2013. Characterization of root response to phosphorus supply from morphology to gene analysis in field-grown wheat. *Journal of Experimental Botany* 64, 1403–1411. <https://doi.org/10.1093/jxb/ert023>.
- Thapa, V.R., Ghimire, R., Acosta-Martínez, V., Marsalis, M.A., Schipanski, M.E., 2021. Cover crop biomass and species composition affect soil microbial community structure and enzyme activities in semiarid cropping systems. *Applied Soil Ecology* 157. <https://doi.org/10.1016/j.apsoil.2020.103735>.



- Tiecher, T., Santos, D.R. dos, Calegari, A., 2012. Soil organic phosphorus forms under different soil management systems and winter crops, in a long term experiment. *Soil and Tillage Research* 124, 57–67. <https://doi.org/10.1016/j.still.2012.05.001>.
- Tiecher, T., Tiecher, T.L., Mallmann, F.J.K., Zafar, M., Ceretta, C.A., Lourenzi, C.R., Brunetto, G., Gatiboni, L.C., Santos, D.R. dos, 2017. Chemical, biological, and biochemical parameters of the soil P cycle after Long-Term pig slurry application in No-Tillage system. *Revista Brasileira de Ciencia do Solo* 41, 1–16. <https://doi.org/10.1590/18069657rbc20170037>.
- Tomkiel, M., Baćmaga, M., Borowik, A., Wyszowska, J., Kucharski, J., 2018. The sensitivity of soil enzymes, microorganisms and spring wheat to soil contamination with carfentrazone-ethyl. *Journal of Environmental Science and Health - Part B Pesticides, Food Contaminants, and Agricultural Wastes* 53, 97–107. <https://doi.org/10.1080/03601234.2017.1387475>.
- Touhami, D., Condon, L.M., McDowell, R.W., 2021. Plant Species Rather than Elevated Atmospheric CO<sub>2</sub> Impact Rhizosphere Properties and Phosphorus Fractions in a Phosphorus-Deficient Soil. *Journal of Soil Science and Plant Nutrition* 21, 622–636. <https://doi.org/10.1007/s42729-020-00388-7>.
- Trabelsi, D., Cherni, A., Zineb, A.B., Dhane, S.F., Mhamdi, R., 2017. Fertilization of *Phaseolus vulgaris* with the Tunisian rock phosphate affects richness and structure of rhizosphere bacterial communities. *Applied Soil Ecology* 114, 1–8. <https://doi.org/10.1016/j.apsoil.2016.11.014>.
- Tripathi, S., Chakraborty, A., Chakrabarti, K., Bandyopadhyay, B.K., 2007. Enzyme activities and microbial biomass in coastal soils of India. *Soil Biology and Biochemistry* 39, 2840–2848. <https://doi.org/10.1016/j.soilbio.2007.05.027>.
- Trujillo-Narcía, A., Rivera-Cruz, M.C., Magaña-Aquino, M., Trujillo-Rivera, E.A., 2019. The Burning of Sugarcane Plantation in the Tropics Modifies the Microbial and Enzymatic Processes in Soil and Rhizosphere. *Journal of Soil Science and Plant Nutrition* 19, 906–919. <https://doi.org/10.1007/s42729-019-00089-w>.
- Truu, M., Truu, J., Ivask, M., 2008. Soil microbiological and biochemical properties for assessing the effect of agricultural management practices in Estonian cultivated soils. *European Journal of Soil Biology* 44, 231–237. <https://doi.org/10.1016/j.ejsobi.2007.12.003>.
- Tu, C.M., 1995. Effect of five insecticides on microbial and enzymatic activities in sandy soil. *Journal of Environmental Science and Health, Part B* 30, 289–306. <https://doi.org/10.1080/03601239509372940>.
- Turan, V., 2021. Calcite in combination with olive pulp biochar reduces Ni mobility in soil and its distribution in chili plant. *International Journal of Phytoremediation* 24, 166–176. <https://doi.org/10.1080/15226514.2021.1929826>.
- Turner, B.L., and Haygarth, P.M., 2005. Phosphatase activity in temperate pasture soils: Potential regulation of labile organic phosphorus turnover by phosphodiesterase activity. *Science of the Total Environment* 344, 27–36. <https://doi.org/10.1016/j.scitotenv.2005.02.003>.
- Tuti, M.D., Pal, R.S., Mahanta, D., Pandey, B.M., Bisht, J.K., 2020. Soil Chemical and Biological Activities under Vegetable Intensive Colocasia-based Cropping System in

Indian Sub-Himalayas. *Communications in Soil Science and Plant Analysis* 51, 948–962. <https://doi.org/10.1080/00103624.2020.1744623>.

Ullah, Rehmat, Mehdi, S.M., Khan, K.S.U., Sheikh, A.A., Sulistyowati, E., Saud, M., 2018a. Mineralization of Organic Residues, Dynamics of Microbial Biomass and Enzyme Activities in an Aridisol and Alfisol Soil under Rain-Fed Dry Farming. *AGRITROPICA : Journal of Agricultural Sciences* 1, 25–36. <https://doi.org/10.31186/j.agritropica.1.1.25-36>

Ullah, R., Aslam, Z., Khaliq, A., Zahir, Z.A., 2018b. Sunflower residue incorporation suppresses weeds, enhances soil properties and seed yield of spring-planted mung bean. *Planta Daninha* 36, 1–14. <https://doi.org/10.1590/S0100-83582018360100057>.

Ullah, R., Aslam, Z., Maitah, M., Zaman, Q.U., Bashir, S., Hassan, W., Chen, Z., 2020. Sustainable weed control and enhancing nutrient use efficiency in crops through brassica (*Brassica compestris* L.) allelopathy. *Sustainability (Switzerland)* 12, 1–17. <https://doi.org/10.3390/su12145763>.

Valarini, P.J., Alvarez, M.C.D., Gascó, J.M., Guerrero, F., Tokeshi, H., 2003. Assessment of soil properties by organic matter and EM-microorganism incorporation. *Revista Brasileira de Ciência do Solo* 27, 519–525. <https://doi.org/10.1590/s0100-06832003000300013>.

Vanlalveni, C., and Lalfakzuala, R., 2018. Effect of seasonal variation on soil enzymes activity and fertility of soil in paddy fields of North Vanlaiphei, Mizoram, India. *Science Vision* 18, 70–73. <https://doi.org/10.33493/scivis.18.02.04>.

Vekemans, X., Godden, B., Penninckx, M.J., 1989. Factor analysis of the relationships between several physico-chemical and microbiological characteristics of some Belgian agricultural soils. *Soil Biology and Biochemistry* 21, 53–58. [https://doi.org/10.1016/0038-0717\(89\)90010-2](https://doi.org/10.1016/0038-0717(89)90010-2).

Venkatesan, S., Senthurpandian, V.K., 2006. Comparison of enzyme activity with depth under tea plantations and forested sites in south India. *Geoderma* 137, 212–216. <https://doi.org/10.1016/j.geoderma.2006.08.011>.

Ventura, B.S., Meyer, E., Souza, M., Vieira, A.S., Scarsanella, J.D.A., Comin, J.J., Lovato, P.E., 2021. Soil phosphorus availability and uptake by mycorrhizal and non-mycorrhizal plants in an onion no-tillage system. *Ciencia Rural* 51. <https://doi.org/10.1590/0103-8478cr20200839>.

Verdenelli, R.A., Conforto, C.B., Pérez-Brandán, C., Chavarría, D., Rovea, A., Vargas-Gil, S., Meriles, J.M., 2013. Integrated multivariate analysis of selected soil microbial properties and their relationships with mineral fertilization management in a conservation agriculture system. *Acta Agriculturae Scandinavica Section B: Soil and Plant Science* 63, 623–632. <https://doi.org/10.1080/09064710.2013.837193>.

Verma, S.K., Pankaj, U., Khan, K., Singh, R., Verma, R.K., 2016a. Bioinoculants and Vermicompost Improve *Ocimum basilicum* Yield and Soil Health in a Sustainable Production System. *Clean - Soil, Air, Water* 44, 686–693. <https://doi.org/10.1002/clen.201400639>.

Verma, S., Adak, A., Prasanna, R., Dhar, S., Choudhary, H., Nain, L., Shivay, Y.S., 2016b. Microbial priming elicits improved plant growth promotion and nutrient uptake

in pea. *Israel Journal of Plant Sciences* 63, 191–207.  
<https://doi.org/10.1080/07929978.2016.1200352>.

Verma, R.K., Shivay, Y.S., Prasanna, R., Choudhary, M., Ghasal, P.C., 2021. Nutrient management options modulating soil physico-chemical and biological properties under direct-seeded rice-based cropping systems. *Archives of Agronomy and Soil Science* 67, 1783–1798. <https://doi.org/10.1080/03650340.2020.1808627>.

Vinhal-Freitas, I.C., Correa, G.F., Wendling, B., Bobul'ska, L., Ferreira, A.S., 2017. Soil textural class plays a major role in evaluating the effects of land use on soil quality indicators. *ECOLOGICAL INDICATORS* 74, 182–190.  
<https://doi.org/10.1016/j.ecolind.2016.11.020>.

Wakelin, S.A., Gupta, V.V.S.R., Harvey, P.R., Ryder, M.H., 2007. The effect of *Penicillium* fungi on plant growth and phosphorus mobilization in neutral to alkaline soils from southern Australia. *Can. J. Microbiol.* 53, 106–115.  
<https://doi.org/10.1139/w06-109>.

Waldrop, M.P., Balser, T.C., Firestone, M.K., 2000. Linking microbial community composition to function in a tropical soil. *Soil Biology and Biochemistry* 32, 1837–1846. [https://doi.org/10.1016/S0038-0717\(00\)00157-7](https://doi.org/10.1016/S0038-0717(00)00157-7).

Wang, F.Y., Tong, R.J., Shi, Z.Y., Xu, X.F., He, X.H., 2011a. Inoculations with Arbuscular mycorrhizal fungi increase vegetable yields and decrease phoxim concentrations in carrot and green onion and their soils. *PLoS ONE* 6.  
<https://doi.org/10.1371/journal.pone.0016949>.

Wang, J.B., Chen, Z.H., Chen, L.J., Zhu, A.N., Wu, Z.J., 2011b. Surface soil phosphorus and phosphatase activities affected by tillage and crop residue input amounts. *Plant, Soil and Environment* 57, 251–257. <https://doi.org/10.17221/437/2010-pse>.

Wang, P., Zhang, J.J., Xia, R.X., Shu, B., Wang, M.Y., Wu, Q.S., Dong, T., 2011c. Arbuscular mycorrhiza, rhizospheric microbe populations and soil enzyme activities in citrus orchards under two types of no-tillage soil management. *Spanish Journal of Agricultural Research* 9, 1307–1318. <https://doi.org/DOI 10.5424/sjar/20110904-307-10>.

Wang, S., Liang, X., Chen, Y., Luo, Q., Liang, W., Li, S., Huang, C., Li, Z., Wan, L., Li, W., Li, W., Shao, X., 2012. Phosphorus loss potential and phosphatase activity under phosphorus fertilization in long-term paddy wetland agroecosystems. *Soil Science Society of America Journal* 76, 161–167. <https://doi.org/10.2136/sssaj2011.0078>.

Wang, F., Jiang, R., Kertesz, M.A., Zhang, F., Feng, G., 2013a. Arbuscular mycorrhizal fungal hyphae mediating acidification can promote phytate mineralization in the hyphosphere of maize (*zea mays* L.). *Soil Biology and Biochemistry* 65, 69–74.  
<https://doi.org/10.1016/j.soilbio.2013.05.010>.

Wang, L., Cai, K., Chen, Y., Wang, G., 2013b. Silicon-mediated tomato resistance against *Ralstonia solanacearum* is associated with modification of soil microbial community structure and activity. *Biological Trace Element Research* 152, 275–283.  
<https://doi.org/10.1007/s12011-013-9611-1>.

Wang, Y., Chi, S. yun, Ning, T. yuan, Tian, S. zhong, Li, Z. jia, 2013c. Coupling Effects of Irrigation and Phosphorus Fertilizer Applications on Phosphorus Uptake and Use

Efficiency of Winter Wheat. *Journal of Integrative Agriculture* 12, 263–272.  
[https://doi.org/10.1016/S2095-3119\(13\)60225-7](https://doi.org/10.1016/S2095-3119(13)60225-7).

Wang, M., Wu, C., Cheng, Z., Meng, H., Zhang, M., Zhang, H., 2014a. Soil chemical property changes in eggplant/garlic relay intercropping systems under continuous cropping. *PLoS ONE* 9. <https://doi.org/10.1371/journal.pone.0111040>.

Wang, Y.P., Li, X.G., Hai, L., Siddique, K.H.M., Gan, Y., Li, F.M., 2014b. Film fully-mulched ridge-furrow cropping affects soil biochemical properties and maize nutrient uptake in a rainfed semi-arid environment. *Soil Science and Plant Nutrition* 60, 486–498. <https://doi.org/10.1080/00380768.2014.909709>.

Wang, X., Deng, X., Pu, T., Song, C., Yong, T., Yang, F., Sun, X., Liu, W., Yan, Y., Du, J., Liu, J., Su, K., Yang, W., 2017. Contribution of interspecific interactions and phosphorus application to increasing soil phosphorus availability in relay intercropping systems. *Field Crops Research* 204, 12–22. <https://doi.org/10.1016/j.fcr.2016.12.020>.

Wang, F., Tang, J., Li, Z., Xiang, J., Wang, L., Tian, L., Jiang, L., Luo, Y., Hou, E., Shao, X., 2021a. Warming reduces the production of a major annual forage crop on the Tibetan Plateau. *Science of the Total Environment* 798, 149211. <https://doi.org/10.1016/j.scitotenv.2021.149211>.

Wang, Y., Huang, Q., Gao, H., Zhang, R., Yang, L., Guo, Y., Li, H., Awasthi, M.K., Li, G., 2021b. Long-term cover crops improved soil phosphorus availability in a rain-fed apple orchard. *Chemosphere* 275, 130093. <https://doi.org/10.1016/j.chemosphere.2021.130093>.

Wang, Y., Huang, C., Liu, M., Yuan, L., 2021c. Long-term application of manure reduced nutrient leaching under heavy N deposition. *Nutrient Cycling in Agroecosystems* 4. <https://doi.org/10.1007/s10705-020-10107-4>.

Wang, M., Wu, Y., Zhao, J., Liu, Y., Chen, Z., Tang, Z., Tian, W., Xi, Y., Zhang, J., 2022a. Long-term fertilization lowers the alkaline phosphatase activity by impacting the phoD-harboring bacterial community in rice-winter wheat rotation system. *Science of the Total Environment* 821. <https://doi.org/10.1016/j.scitotenv.2022.153406>.

Wang, W., Li, Y., Guan, P., Chang, L., Zhu, X., Zhang, P., Wu, D., 2022b. How do climate warming affect soil aggregate stability and aggregate-associated phosphorus storage under natural restoration? *Geoderma* 420, 115891. <https://doi.org/10.1016/j.geoderma.2022.115891>.

Wang, Y., Yang, X., Xu, M., Geissen, V., 2022c. Variations of soil phosphatase activity and phosphorus fractions in ginger fields exposed to different years of chloropicrin fumigation. *Journal of Soils and Sediments* 22, 1372–1384. <https://doi.org/10.1007/s11368-022-03135-w>.

Wei, M., Tan, F., Zhu, H., Cheng, K., Wu, X., Wang, J., Zhao, K., Tang, X., 2012. Impact of Bt-transgenic rice (SHK601) on soil ecosystems in the rhizosphere during crop development. *Plant, Soil and Environment* 58, 217–223.

Wei, K., Chen, Z., Zhu, A., Zhang, J., Chen, L., 2014a. Application of <sup>31</sup>P NMR spectroscopy in determining phosphatase activities and P composition in soil aggregates influenced by tillage and residue management practices. *Soil and Tillage Research* 138, 35–43. <https://doi.org/10.1016/j.still.2014.01.001>.

- Wei, K., Chen, Z.H., Zhang, X.P., Liang, W.J., Chen, L.J., 2014b. Tillage effects on phosphorus composition and phosphatase activities in soil aggregates. *Geoderma* 217–218, 37–44. <https://doi.org/10.1016/j.geoderma.2013.11.002>.
- Wei, K., Bao, H., Huang, S., Chen, L., 2017. Effects of long-term fertilization on available P, P composition and phosphatase activities in soil from the Huang-Huai-Hai Plain of China. *Agriculture, Ecosystems and Environment* 237, 134–142. <https://doi.org/10.1016/j.agee.2016.12.030>.
- Wei, K., Chen, Z., Jiang, N., Zhang, Y., Feng, J., Tian, J., Chen, X., Lou, C., Chen, L., 2021. Effects of mineral phosphorus fertilizer reduction and maize straw incorporation on soil phosphorus availability, acid phosphatase activity, and maize grain yield in northeast China. *Archives of Agronomy and Soil Science* 67, 66–78. <https://doi.org/10.1080/03650340.2020.1714031>.
- Wick, B.; Kühne, R. F.; Vlek, P. L. G., 1998. Soil microbiological parameters as indicators of soil quality under improved fallow management systems in southwestern Nigeria.. *Plant and Soil*, 202, 97-107. <http://dx.doi.org/10.1023/A:1004305615397>.
- Wojewódzki, P., Lemanowicz, J., Debska, B., Haddad, S.A., 2022. Soil Enzyme Activity Response under the Amendment of Different Types of Biochar. *Agronomy* 12, 1–14. <https://doi.org/10.3390/agronomy12030569>.
- Woźniak, A., and Kawecka-Radomska, M., 2016. Crop management effect on chemical and biological properties of soil. *International Journal of Plant Production* 10, 391–402.
- Woźniak, A., 2019. Chemical properties and enzyme activity of soil as affected by tillage system and previous crop. *Agriculture (Switzerland)* 9. <https://doi.org/10.3390/agriculture9120262>.
- Woźniak, M., Gałazka, A., Siebielec, G., Frąc, M., 2022. Can the Biological Activity of Abandoned Soils Be Changed by the Growth of *Paulownia elongata* × *Paulownia fortunei*?— Preliminary Study on a Young Tree Plantation. *Agriculture (Switzerland)* 12. <https://doi.org/10.3390/agriculture12020128>.
- Wu, F., Wan, J., Wu, S., Wong, M., 2012. Effects of earthworms and plant growth-promoting rhizobacteria (PGPR) on availability of nitrogen, phosphorus, and potassium in soil. *Journal of Plant Nutrition and Soil Science* 175, 423–433. <https://doi.org/10.1002/jpln.201100022>.
- Wyszkowska, J., Kucharski, J., Jastrzebska, E., Hłasko, A., 2001. The Biological Properties of Soil as Influenced by Chromium Contamination. *Polish Journal of Environmental Studies* 10, 37–42.
- Wyszkowska, J., 2002. Effect of Soil Contamination with Treflan 480 EC on Biochemical Properties of Soil. *Polish Journal of Environmental Studies* 11, 71–77.
- Wyszkowska, J., Kucharski, J., Wałdowska, E., 2002. The influence of diesel oil contamination on soil microorganisms and oat growth. *Rostlinna Vyroba* 48, 51–57. <https://doi.org/10.17221/4359-pse>.
- Wyszkowska J., Kucharski J., Boros E., 2005. Effect of nickel contamination on soil enzymatic activities. *Plant, Soil and Environment*: 51: 523-531. 10.17221/3627-PSE.

- Wyszkowska, J., and Wyszkowski, M., 2010. Activity of soil dehydrogenases, urease, and acid and alkaline phosphatases in soil polluted with petroleum. *Journal of Toxicology and Environmental Health - Part A: Current Issues* 73, 1202–1210. <https://doi.org/10.1080/15287394.2010.492004>.
- Wyszkowska, J., Borowik, A., Olszewski, J., Kucharski, J., 2019. Soil Bacterial Community and Soil Enzyme Activity. *Diversity* 11.
- Xie, C., Tang, J., Zhao, J., Wu, D., Xu, X., 2011. Comparison of phosphorus fractions and alkaline phosphatase activity in sludge, soils, and sediments. *Journal of Soils and Sediments* 11, 1432–1439. <https://doi.org/10.1007/s11368-011-0429-1>.
- Xomphoutheb, T., Jiao, S., Guo, X., Mabagala, F.S., Sui, B., Wang, H., Zhao, L., Zhao, X., 2020. The effect of tillage systems on phosphorus distribution and forms in rhizosphere and non-rhizosphere soil under maize (*Zea mays* L.) in Northeast China. *Scientific Reports* 10, 1–9. <https://doi.org/10.1038/s41598-020-63567-7>.
- Xu, L., Yi, M., Yi, H., Guo, E., Zhang, A., 2018. Manure and mineral fertilization change enzyme activity and bacterial community in millet rhizosphere soils. *World Journal of Microbiology and Biotechnology* 34, 0. <https://doi.org/10.1007/s11274-017-2394-3>.
- Xu, L., Han, Y., Yi, M., Yi, H., Guo, E., Zhang, A., 2019. Shift of millet rhizosphere bacterial community during the maturation of parent soil revealed by 16S rDNA high-throughput sequencing. *Applied Soil Ecology* 135, 157–165. <https://doi.org/10.1016/j.apsoil.2018.12.004>.
- Yadav, B.K., Tarafdar, J.C., 2007. Ability of *Emericella rugulosa* to mobilize unavailable P compounds during Pearl millet [*Pennisetum glaucum* (L.) R. Br.] crop under arid condition. *Indian Journal of Microbiology* 47, 57–63. <https://doi.org/10.1007/s12088-007-0011-0>.
- Yang, L., Bian, X., Yang, R., Zhou, C., Tang, B., 2018. Assessment of organic amendments for improving coastal saline soil. *Land Degradation and Development* 29, 3204–3211. <https://doi.org/10.1002/ldr.3027>.
- Yang, X., Bao, X., Yang, Y., Zhao, Y., Liang, C., Xie, H., 2019. Comparison of soil phosphorus and phosphatase activity under long-term no-tillage and maize residue management. *Plant, Soil and Environment* 65, 408–415. <https://doi.org/10.17221/307/2019-PSE>.
- Yao, T., Zhang, W., Gulaqa, A., Cui, Y., Zhou, Y., Weng, W., Wang, X., Liu, Q., Jin, F., 2021. Effects of Peanut Shell Biochar on Soil Nutrients, Soil Enzyme Activity, and Rice Yield in Heavily Saline-Sodic Paddy Field. *Journal of Soil Science and Plant Nutrition* 21, 655–664. <https://doi.org/10.1007/s42729-020-00390-z>.
- Yin, J., Sui, Z.-M., Huang, J.-G., 2021. Mobilization of soil inorganic phosphorus and stimulation of crop phosphorus uptake and growth induced by *Ceriporia lacerata* HG2011. *Geoderma* 383. <https://doi.org/10.1016/j.geoderma.2020.114690>.
- Yoshioka I.C., Sánchez De Prager M., Bolaños B M.M., 2006. Actividad de fosfatasa ácida y alcalina en suelo cultivado con plátano en tres sistemas de manejo. *Acta Agronómica* (2006) 55:1-8. [https://revistas.unal.edu.co/index.php/acta\\_agronomica/article/view/211](https://revistas.unal.edu.co/index.php/acta_agronomica/article/view/211).

- Yu, S., He, Z.L., Stoffella, P.J., Calvert, D.V., Yang, X.E., Banks, D.J., Baligar, V.C., 2006. Surface runoff phosphorus (P) loss in relation to phosphatase activity and soil P fractions in Florida sandy soils under citrus production. *Soil Biology and Biochemistry* 38, 619–628. <https://doi.org/10.1016/j.soilbio.2005.02.040>.
- Yu, H., Wang, F., Shao, M., Huang, L., Xie, Y., Xu, Y., Kong, L., 2021. Effects of Rotations With Legume on Soil Functional Microbial Communities Involved in Phosphorus Transformation. *Frontiers in Microbiology* 12. <https://doi.org/10.3389/fmicb.2021.661100>.
- Yuan, J., Wang, L., Wang, S., Wang, Y., Wang, H., Chen, H., Zhu, W., 2018. The use of biologically based phosphorus fractions to evaluate soil P availability in reduced P-input paddy soils. *Soil Use and Management* 34, 326–334. <https://doi.org/10.1111/sum.12430>.
- Yuan, J., Wang, Y., Zhao, X., Chen, H., Chen, G., Wang, S., 2022. Seven years of biochar amendment has a negligible effect on soil available P and a progressive effect on organic C in paddy soils. *Biochar* 4, 1–13. <https://doi.org/10.1007/s42773-021-00127-w>.
- Zago, L.M.S., Moreira, A.K.O., Silva-Neto, C.M., Nabout, J.C., Ferreira, M.E., Caramori, S.S., 2018. Biochemical activity in Brazilian Cerrado soils is differentially affected by perennial and annual crops. *Australian Journal of Crop Science* 12, 235–242. <https://doi.org/10.21475/ajcs.18.12.02.pne716>.
- Zhang, W., Zhao, J., Pan, F., Li, D., Chen, H., Wang, K., 2015. Changes in nitrogen and phosphorus limitation during secondary succession in a karst region in southwest China. *Plant and Soil* 391, 77–91. <https://doi.org/10.1007/s11104-015-2406-8>.
- Zhang, J., Bo, G., Zhang, Z., Kong, F., Wang, Y., Shen, G., 2016a. Effects of straw incorporation on soil nutrients, enzymes, and aggregate stability in tobacco fields of China. *Sustainability (Switzerland)* 8, 1–12. <https://doi.org/10.3390/su8080710>.
- Zhang, Y., Hu, M., Liang, H., Wang, X., Wang, Z., Jiang, Z., Li, X., 2016b. The effects of sugar beet rinse water irrigation on the soil enzyme activities. *Toxicological and Environmental Chemistry* 98, 419–428. <https://doi.org/10.1080/02772248.2015.1123485>.
- Zhang, L., Wang, J., Fu, G., Zhao, Y., 2018. Rotary tillage in rotation with plowing tillage improves soil properties and crop yield in a wheat-maize cropping system. *PLoS ONE* 13, 1–16. <https://doi.org/10.1371/journal.pone.0198193>.
- Zhang, Yu, Hu, J., Bai, J., Qin, H., Wang, Junhua, Wang, Jingwei, Lin, X., 2019a. Intercropping with sunflower and inoculation with arbuscular mycorrhizal fungi promotes growth of garlic chive in metal-contaminated soil at a WEEE-recycling site. *Ecotoxicology and Environmental Safety* 167, 376–384. <https://doi.org/10.1016/j.ecoenv.2018.10.046>.
- Zhang, Y., Wang, X., Xu, F., Song, T., Du, H., Gui, Y., Xu, M., Cao, Y., Dang, X., Rensing, C., Zhang, J., Xu, W., 2019b. Combining Irrigation Scheme and Phosphorous Application Levels for Grain Yield and Their Impacts on Rhizosphere Microbial Communities of Two Rice Varieties in a Field Trial. *Journal of Agricultural and Food Chemistry* 67, 10577–10586. <https://doi.org/10.1021/acs.jafc.9b03124>.

- Zhang, Z.J., Wang, X.Z., Wang, H., Huang, E., Sheng, J.L., Zhou, L.Q., Jin, W.Z., 2020. Housefly Larvae (*Musca domestica*) Vermicompost on Soil Biochemical Features for a Chrysanthemum (*Chrysanthemum morifolium*) Farm. *Communications in Soil Science and Plant Analysis* 51, 1315–1330. <https://doi.org/10.1080/00103624.2020.1763389>.
- Zhang, Y., Finn, D., Bhattacharyya, R., Dennis, P.G., Doolette, A.L., Smernik, R.J., Dalal, R.C., Meyer, G., Lombi, E., Klysubun, W., Jones, A.R., Wang, P., Menzies, N.W., Kopittke, P.M., 2021. Long-term changes in land use influence phosphorus concentrations, speciation, and cycling within subtropical soils. *GEODERMA* 393. <https://doi.org/10.1016/j.geoderma.2021.115010>.
- Zhao, Y., Wang, P., Li, J., Chen, Y., Ying, X., Liu, S., 2009. The effects of two organic manures on soil properties and crop yields on a temperate calcareous soil under a wheat-maize cropping system. *European Journal of Agronomy* 31, 36–42. <https://doi.org/10.1016/j.eja.2009.03.001>.
- Zhaolei, L., Naishun, B., Jun, C., Xueping, C., Manqiu, X., Feng, W., Zhiping, S., Changming, F., 2017. Effects of long-term cultivation of transgenic Bt rice (Kefeng-6) on soil microbial functioning and C cycling. *Scientific Reports* 7, 1–13. <https://doi.org/10.1038/s41598-017-04997-8>.
- Zhong, W.-H., Cai, Z.-C., Zhang, H., 2007. Effects of Long-Term Application of Inorganic Fertilizers on Biochemical Properties of a Rice-Planting Red Soil. *Pedosphere* 17, 419–428. [https://doi.org/10.1016/s1002-0160\(07\)60051-4](https://doi.org/10.1016/s1002-0160(07)60051-4).
- Zhong, S., Zeng, H., Jin, Z., 2015. Soil Microbiological and Biochemical Properties as Affected by Different Long-Term Banana-Based Rotations in the Tropics. *Pedosphere* 25, 868–877. [https://doi.org/10.1016/S1002-0160\(15\)30067-9](https://doi.org/10.1016/S1002-0160(15)30067-9).
- Zhou, L., Xu S.T., Monreal C.M., Mclaughlin N.B., Zhao B.P., Liu J.H., Hao, G.C., 2022. Bentonite-Humic Acid Improves Soil Organic Carbon, Microbial Biomass, Enzyme Activities and Grain Quality in a Sandy Soil Cropped to Maize (*Zea Mays* L.) in a Semi-Arid Region. *Journal of Integrative Agriculture* 21(1):208–21. doi: 10.1016/S2095-3119(20)63574-2.
- Zhu, L. xia, Xiao, Q., Cheng, H. yan, Shi, B. jie, Shen, Y. fang, Li, S. qing, 2017. Seasonal dynamics of soil microbial activity after biochar addition in a dryland maize field in North-Western China. *Ecological Engineering* 104, 141–149. <https://doi.org/10.1016/j.ecoleng.2017.04.026>.
- Zhu, Z., Qian, J., Zhang, Y., Zhang, H., Dai, H., Zhang, Z., Miao, M., Jiang, J., 2022. Taro (*Colocasia esculenta* (L.) Schott) Yields and Soil Chemical Properties Were Improved by Row-Surface Straw Mulching. *Agronomy* 12. <https://doi.org/10.3390/agronomy12030645>.
- Zibilske, L.M., and Bradford, J.M., 2003. Tillage effects on phosphorus mineralization and microbial activity. *Soil Science* 168, 677–685. <https://doi.org/10.1097/01.ss.0000095141.68539.c7>.
- Zibilske, L.M., and Makus, D.J., 2009. Black oat cover crop management effects on soil temperature and biological properties on a Mollisol in Texas, USA. *Geoderma* 149, 379–385. <https://doi.org/10.1016/j.geoderma.2009.01.001>.
